# Supplementary material
Source: PubMed Central journal article supplement (PMC5567816)
Supplement: NIHMS891302-supplement-Supplemental.pdf [file NIHMS891302-supplement-Supplemental.pdf]

# Supporting Information

## Comparison of the deacylase and deacetylase activity of zinc-dependent HDACs

Jesse J. McClure, Elizabeth S. Inks, Cheng Zhang, Yuri K. Peterson, Jiaying Li, Kalyan Chundru, Bradley Lee, Ashley Buchanan, Shiqin Miao, C. James Chou

### Table of Contents:

|                                                      |             |
|------------------------------------------------------|-------------|
| <b>Supporting Information:</b>                       | Page S1     |
| <b>Supplementary Figure 1:</b>                       | Page S2     |
| <b>Supplementary Figure 2:</b>                       | Page S3     |
| <b>Supplementary Figure 3:</b>                       | Page S4     |
| <b>Supplementary Figure 4:</b>                       | Page S5     |
| <b>Supplementary Figure 5:</b>                       | Page S6     |
| <b>Supplementary Figure 6:</b>                       | Page S7     |
| <b>Supplementary Figure 7:</b>                       | Page S8     |
| <b>Supplementary Table 1:</b>                        | Page S9     |
| <b>Supplementary Methods:</b>                        | Page S10-13 |
| <b>Supplementary Chemistry and Characterization:</b> | Page S14-22 |
| <b>Supplementary NMR Data:</b>                       | Page S23-70 |

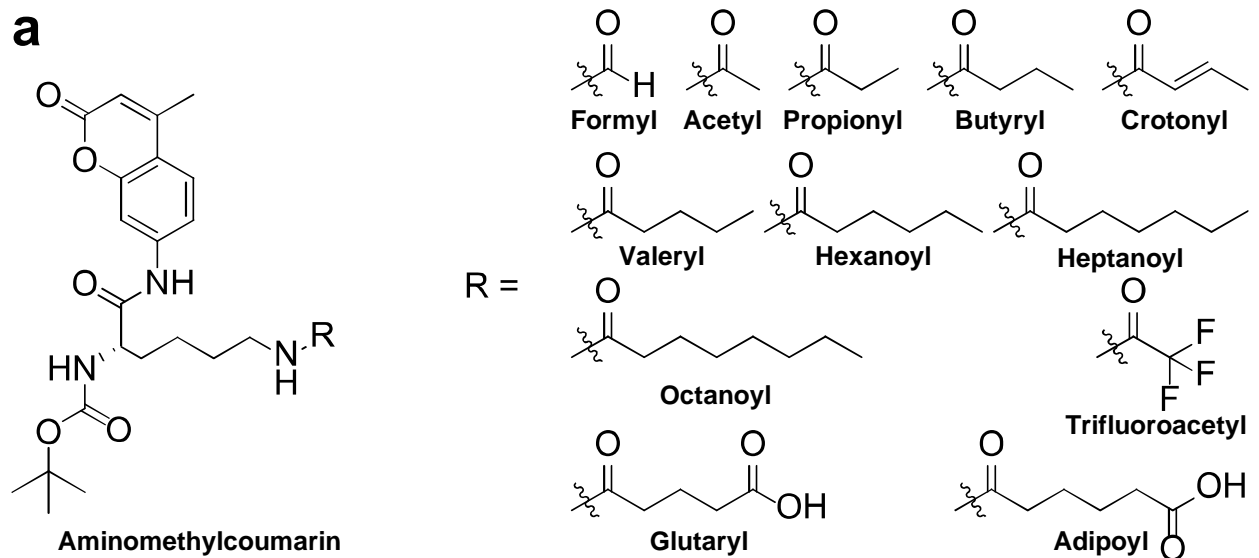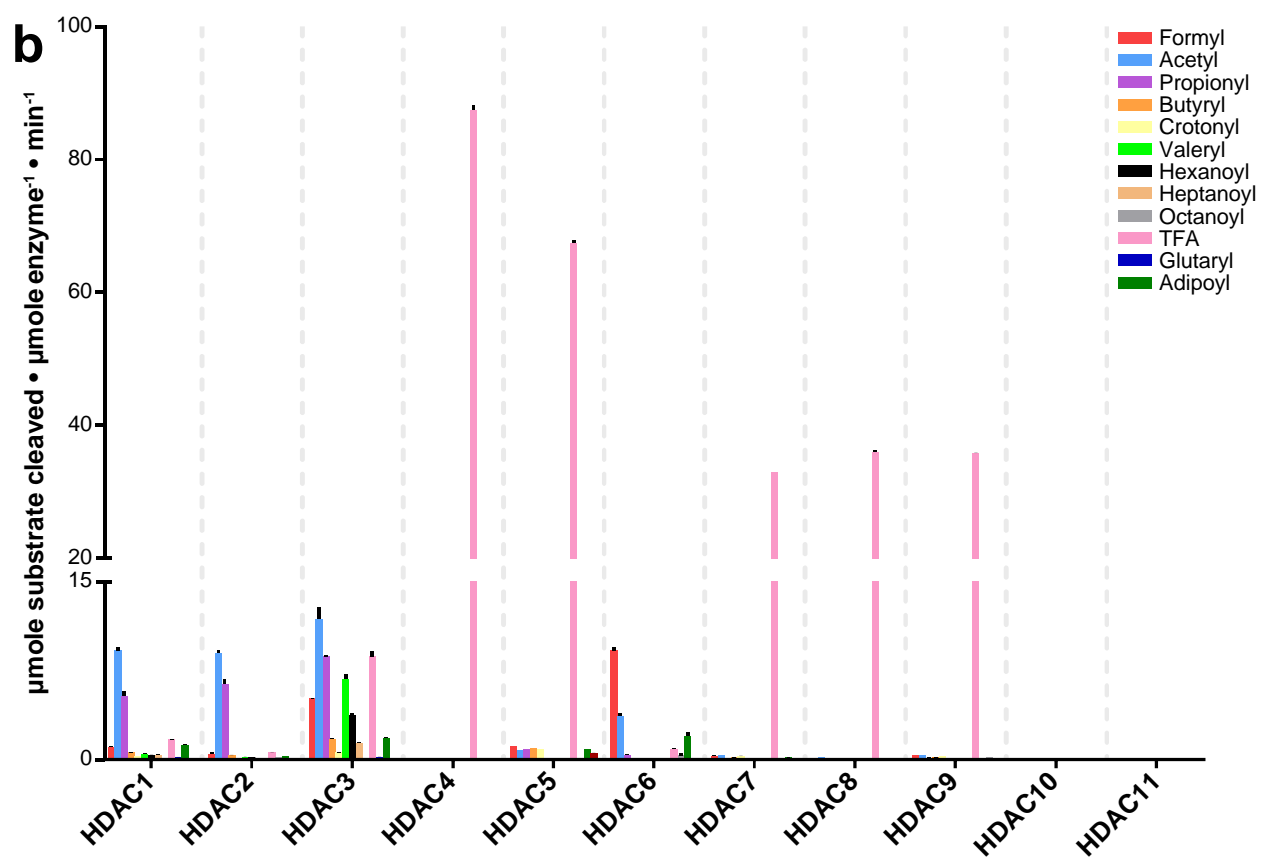

**Supplementary Figure 1 a)** Chemical structures of 12 acyl-based substrates synthesized for kinetic profiling purposes. **b)** All synthesized acyl-substrate data against zinc-dependent HDAC enzymes.  $n = 3$ ; error bars are S.E.M.

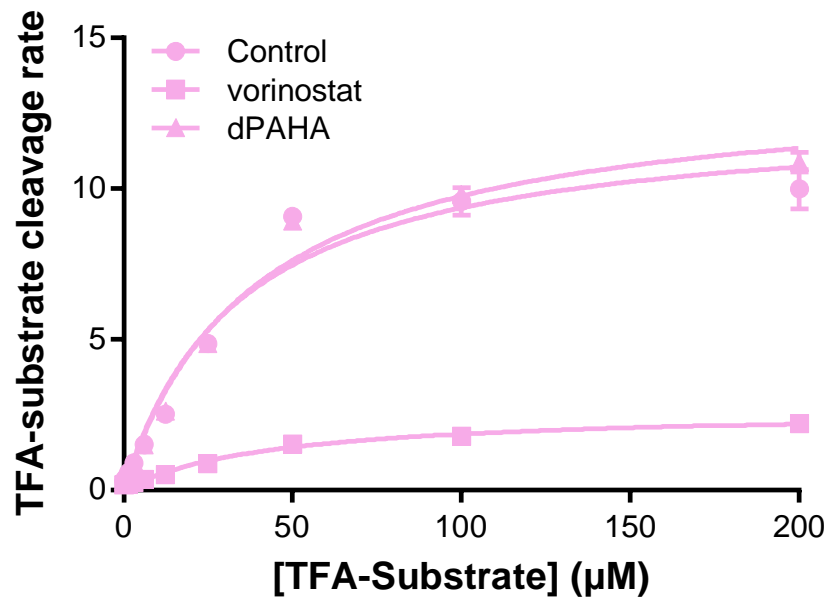

**Supplementary Figure 2**  $V_{max}$  comparison of HDAC3 with TFA-substrate. Y-axis units: nM · min<sup>-1</sup>. 1 µM for vorinostat and dPAHA. 2 hour incubation with inhibitors, 2 hour incubation with substrate. Dunnett's multiple comparisons test yields p-value of 0.6208 comparing dPAHA to control. p-value of 0.0002 comparing vorinostat to control. n = 3; error bars are S.E.M.

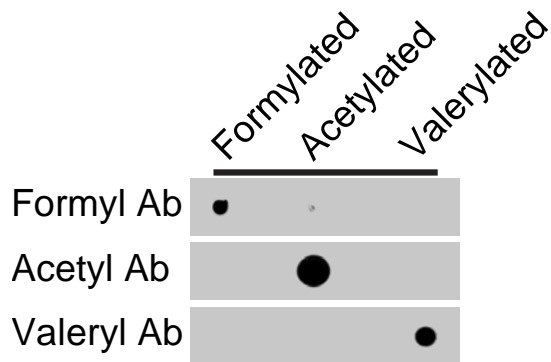

**Supplementary Figure 3** Antibody Cross Reactivity Comparison with Acylated Bovine Serum Albumin. Solutions (10 mg/mL) of acylated BSA were dotted onto nitrocellulose (0.5  $\mu$ L) and incubated with various antibodies. There is little appreciable cross-reactivity between all used antibodies indicating a high level of specificity toward advertised target. Representative blot, n = 2.

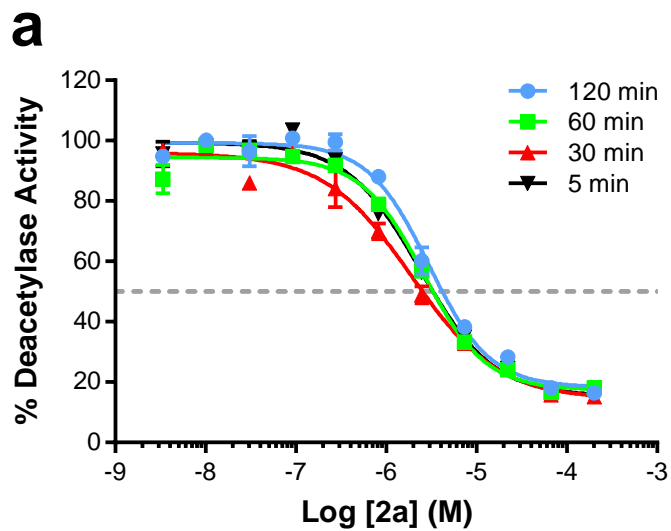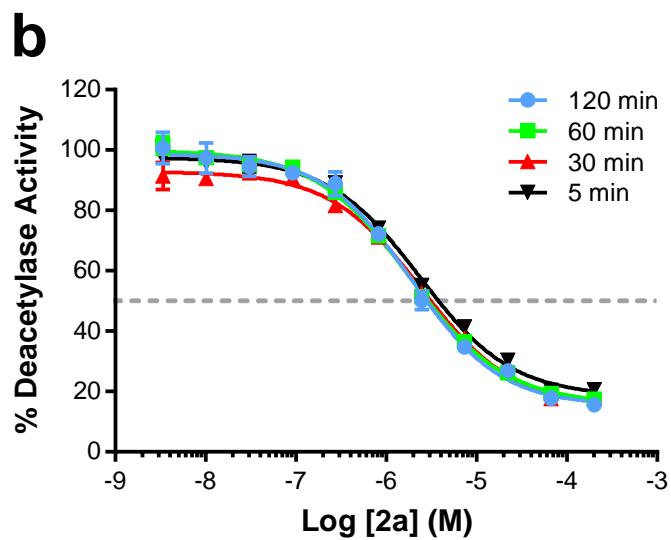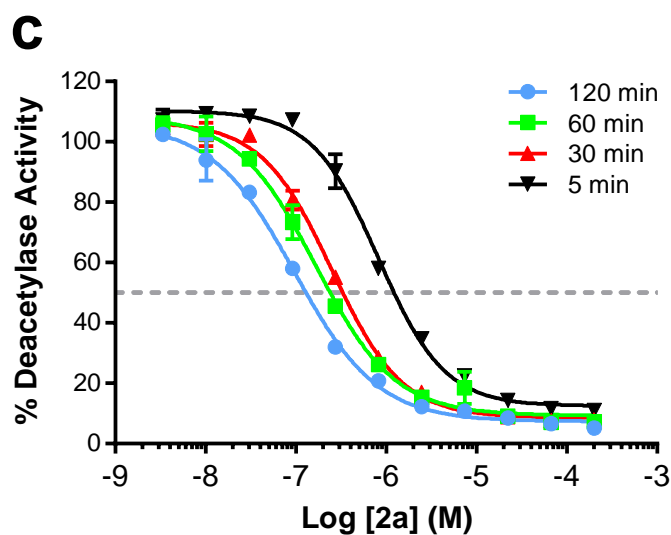

**Supplementary Figure 4** Time dependent Kinetics of HDACs 1-3 vs **2a**. **a)** HDAC1 **b)** HDAC2 **c)** HDAC3. **2a** shows time-dependent inhibition toward HDAC3 but not HDACs 1 or 2 at 30°C. n = 2; error bars are S.E.M.

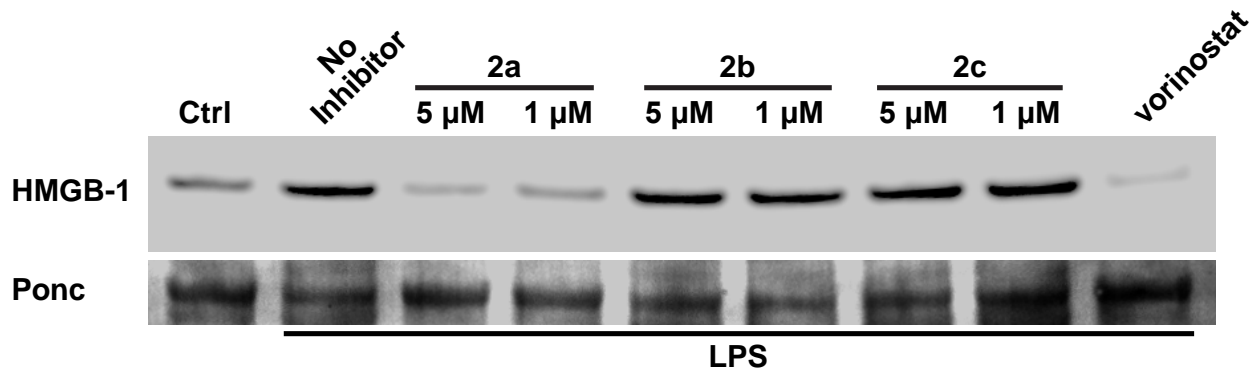

**Supplementary Figure 5** Western blot analysis of RAW264.7 cells. HMGB-1 secretion monitoring with ponceau stain as loading control. Cells were treated for six hours. 1  $\mu$ M vorinostat used. Representative blot of n = 2 experiments.

```

      10      20      30      40      50
HDAC1  1  --MAQTQG--TRRKVCYYDGDVGNYYGQGHMPKPHRIRMTHNLLLNLYGL
HDAC2  1  --MAYSQGGGKKKVCYYDGDIGNYYGQGHMPKPHRIRMTHNLLLNLYGL
HDAC3  1  -----MAKTVAIFYDPDVGNFHYGAGHPMKPHRLALHTSLVLYHYGL
HDAC8  1  MEEPEEPADSGQSLVPVYIYSP EYVSMCDSLAKIPKRASMVHSLIEAYAL

      60      70      80      90     100
HDAC1  48  YRKM EIYRPHKANAEEMTKYHSDDYIKFLRSIRPDNMS EYSKQMQR FNVG
HDAC2  49  YRKM EIYRPHKATAEEMTKYHSDEYIKFLRSIRPDNMS EYSKQMQR FNVG
HDAC3  42  YKKM IVFKPYQASQHD MCRFHS EYIDFLQRVSP T NMQGFTKSLNA FNVG
HDAC8  51  HKQM RIVKPKVASMEEMATFHTDAYLQHLQKVSQEGDDDHPSIE-YGLG

      110     120     130     140     150
HDAC1  98  EDCPVFDGLFEFCQLSTGGSVASAVKLNKQQTDI AVNWAGGLHHA KKS EA
HDAC2  99  EDCPVFDGLFEFCQLSTGGSVAGAVKLNKQQTDM AVNWAGGLHHA KKS EA
HDAC3  92  DDCPVFPGLFEFC SRYTGASLQGATQLN NKI CDIAI NWAGGLHHA KKF EA
HDAC8  100 YDCPAT EGI FDYAAAI GGATITAAQCLIDGMCKVAI NWSGGWHHA K D EA

      160     170     180     190     200
HDAC1  148 SGFCYVNDIVLAIL ELLKYHQRVLYIDIDI HHGDGVEEAFYTTDRVMTVS
HDAC2  149 SGFCYVNDIVLAIL ELLKYHQRVLYIDIDI HHGDGVEEAFYTTDRVMTVS
HDAC3  142 SGFCYVNDIVLIGIL ELLKYHPRVLYIDIDI HHGDGVEEAFYLTDRVMTVS
HDAC8  150 SGFCYLNDAVLGI LRLRRKFERILYVDL DLHHGDGVEDAFSFTSKVMTVS

      210     220     230     240     250
HDAC1  198 FHKYG- EYFPGTGDLRDI GAGKGKYYAVNYP LRDGIDDES YEAFI FKPVMS
HDAC2  199 FHKYG- EYFPGTGDLRDI GAGKGKYYAVN FPMRDGIDDES YGQIFKPIIS
HDAC3  192 FHKYGN YFFPGTGDMYEVGAE SGRYYCLNVPL RLDGIDDSYKHLFQPVIN
HDAC8  200 LHKFSPGF FPGTGDVSDVGLGKGWYYSVNVPI QDGIQDEKY YQICESV LK

      260     270     280     290     300
HDAC1  247 KVMEMFQPSAVVLQCGSDSLSGDRLGCFNLTIKGHAKC VEFVKS FNL PML
HDAC2  248 KVMEMYQPSAVVLQCGADSLSGDRLGCFNLT VKGHAKC VEVVKT FNL PLL
HDAC3  242 QVVD FYQPTCIVLQCGADSLGCDRLGCFNLSIRGHGECV EYVKS FNI PLL
HDAC8  250 EYQA FNP KAVVLQLGADTIAGDPMCSFNMT PVGIGKCLKYILQWQLATL

      310     320     330     340     350
HDAC1  297 MLGGGGYTI RNVARCWYETAVALDTEI PNELPYNDYFEYFGPDFKLHIS
HDAC2  298 MLGGGGYTI RNVARCWYETAVALDCEI PNELPYNDYFEYFGPDFKLHIS
HDAC3  292 VLGGGGYTV RNVARCWYETSLLV EEAISEELPYSEYFEYFAPDFTLHPD
HDAC8  300 I LGGGGY NLANTARCWYLTGVILGKTL SSEIPDHEFFTAYGPDYVLEIT

      360     370     380     390     400
HDAC1  347 PSN-MTNQNTNEYLEKIKQRLFENLRMLPHAPGVQMQAIPEDAIP EESGD
HDAC2  348 PSN-MTNQNTPEYMEKIKQRLFENLRMLPHAPGVQMQAIPEDAVH EDSGD
HDAC3  342 VSTR IENQNSRQYLDQIRQTI FENLRMLNHAPS VQIH DVPADLLTYDRTD
HDAC8  350 PSC-RPDRN EPHRIQQILN YIKGNLKHVV-----

      410     420     430     440     450
HDAC1  396 EDEDDPDKRISICSSDKRIACEEFS DSSEEGEGGRKNSSNFKK-AKRVK
HDAC2  397 EDGEDPDKRISIRASDKRIACDEEFS DSSEEGEGGRRNVADHKKGAKKAR
HDAC3  392 E-----ADA EERG P-----
HDAC8  377 -----

      460     470     480     490
HDAC1  445 TEDEKEKDP EEKKEVTEEEKTK E--EKPEAKGVKEEVKLA-
HDAC2  447 I EEDKKET EDKKT DVKEEDKSKD NSGEKTDTKGT KSEQLSNP
HDAC3  400 --EENYSRPEAPNEFYDGDHND-- --KESDVEI--
HDAC8  377 -----

```

Supplementary Figure 6 Alignment of Class I HDACs.

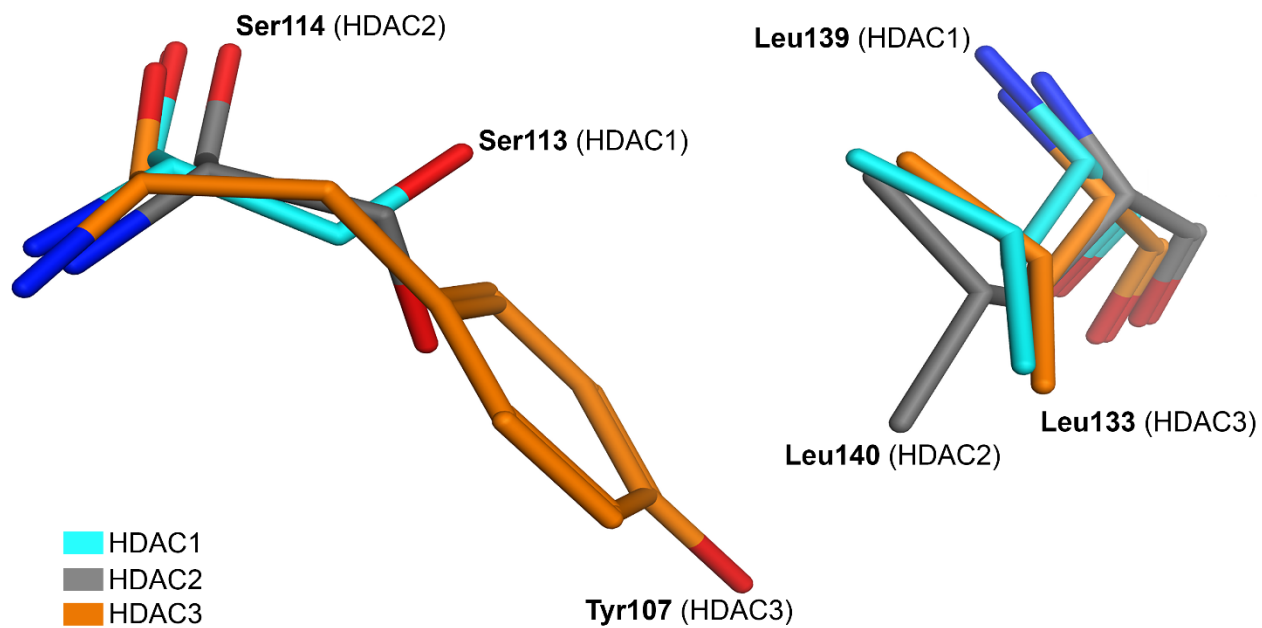

**Supplementary Figure 7** Crystal structure overlay of HDACs 1-3. Leu133 of HDAC3 and Leu139 of HDAC1 possess a very similar conformation and intramolecular assembly. HDAC2, however, does demonstrate different geometry as previously reported. PDB files: 5ICN, 3MAX, and 4A69 for HDACs 1-3 respectively.



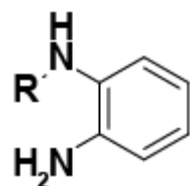

| Name | R-Group | HDAC1 IC <sub>50</sub> | HDAC3 IC <sub>50</sub> |
|------|---------|------------------------|------------------------|
| 1    |         | 16.7 μM                | 4.00 μM                |
| 1a   |         | 3.20 μM                | 0.721 μM               |
| 1b   |         | 5.31 μM                | 1.43 μM                |
| 1c   |         | 6.92 μM                | 1.80 μM                |
| 1d   |         | 2.12 μM                | 0.418 μM               |
| 1e   |         | 4.11 μM                | 1.37 μM                |
| 1f   |         | 0.357 μM               | 0.209 μM               |

Supplementary Table 1. Mean values of n = 3 experiments, S.E.M. for all values < 10% of mean.

## **Supplementary Methods and reagents**

### **Figure generation**

All figures were created using Adobe Illustrator CC or Adobe Photoshop CC. Graphs were generated using GraphPad Prism 7.0. Microsoft Word and Powerpoint 2016 were used for tables and illustrations. Molecular modeling pictures were captured in M.O.E. 2014. Chemical structures were created using ChemDraw 14.0 Alignment was performed in Bioedit 7.2.5.

### **Human HDAC Isozymes**

All human HDAC isozymes were purchased from BPS biosciences and of >90% purity as determined via Coomassie staining with the exception of HDACs 4 and 7 at 65% and 70% pure respectively. All isozymes were generated from baculovirus expression systems in Sf9 insect cells. HDAC1 Lot: 140113. HDAC2 Lot: 110922G. HDAC3 Lot: 120524. HDAC4 Lot: 130115. HDAC5 Lot: 100414. HDAC6 Lot: 140110-G20mM. HDAC7 Lot: 90402. HDAC8 Lot: 110913. HDAC9 Lot: 91020-D. HDAC10 Lot: 101011. HDAC11 Lot: 141104.

### **Deacetylation and Deacylation Assays**

Each isozyme of HDAC was tested for its ability to remove acyl-PTMs at 50  $\mu$ M substrate concentration and 2ng of HDAC enzymes with the homogeneous fluorescence release HDAC deacetylase assay over two hours. For  $K_m$  determination, HDAC substrates were titrated against HDACs 1, 2, 3, and 6 (2 ng enzyme for HDAC3/NCoR2, 10 ng for HDAC1 and 2, and 20 ng for HDAC6). For HDAC3/NCoR2 and HDAC6 over-expression and knockdown lysates, 25  $\mu$ g of total lysates were used with 50  $\mu$ M of acetyl-substrate and 25  $\mu$ g of lysates were used with 100  $\mu$ M of the valeryl-substrate.

Individual  $IC_{50}$  values of HDAC inhibitors for each HDAC isozyme were measured by incubating purified recombinant enzymes with 12 point serial diluted inhibitor concentrations. The

deacetylase activity of HDACs 1, 2, 3, 6, and 10 was measured by assaying enzyme activity against acetyl-substrate, and Class IIa (HDAC4, 5, 7, and 9) and HDAC8 enzyme activity was measured using TFA-substrate. The inhibitors were pre-incubated with each enzyme for two hours at 30°C, and then the substrate was added and further incubated for two hours. The deacylated lysine-AMC is sensitive to protease cleavage by trypsin, yielding free AMC; the amount of free AMC was determined by Tecan M200 at EX=360 nm EM=460 nm. The absolute deacylated lysine concentration was determined using a standard curve defined by free AMC under the same condition.

### **Cell Culture, Transfection, and Treatment**

Hek293 cells were cultured in ATCC recommended conditions. For transfection, cells were plated at 70% confluence in 20 mL in T75 tissue culture flask in media without antibiotics. The HDAC over-expression plasmids were transfected with lipofectamine LTX with Plus reagent, according to the manufacturer's instruction, for 48 hours. For HDAC knockdown experiments, siRNAs were transfected and the cells were harvested after 24 hours. For the LPS treatment, RAW246.7 cells were cultured at 500,000 cells/mL for 24 hours. The culture media was refreshed and HDAC inhibitors were added three hours before the LPS (200 ng/mL) challenge. For the timed NF- $\kappa$ B p65 activation, the cells were harvested at indicated time points and nuclear and cytosolic lysates were isolated. For the NO production, 50  $\mu$ L of media were collected and the media NO concentrations were determined using Griess reagents. For HMGB-1 secretion, the cell media was collected and concentrated using Amicon Ultra-4 spin column. The concentrated lysates were then mixed with 4x LDS loading buffer and run on a 4-12% polyacrylamide gel. The HMGB-1 levels were determined using HMGB-1 monoclonal antibody (Abcam, ab18256). Cell viability is monitored using non-toxic CellTiter-Blue® Cell Viability Assay based on resazurin conversion into a fluorescent end product resorufin by viable cell mitochondria as described by the supplier.

## **Western Blot and Cellular Lysate Preparation**

Acetylated NF- $\kappa$ B p65(Ac-K122/123) and acetylated p53(Ac-K382) antibodies were purchased from Signalway Biotechnology and Cell Signaling Technology. Formyl- and valeryl-lysine antibodies were purchased from GeneTex. Acetyl-lysine antibody was purchased from ImmuneChem. All other antibodies were purchased from Santa Cruz Biotechnology. Formyl- and valeryl-lysine antibodies were demonstrated to be >50,000 fold selective for their respective acyl group via ELISA testing done by the manufacturer. HDAC-inhibitor-treated cells were harvested under indicated conditions. For HDAC inhibitor treatments, the cells were treated with HDAC inhibitors and harvested. The cells were lysed with RIPA buffer and loaded with LDS loading buffer into 4-12% SDS-PAGE gels (Novex, Invitrogen). The proteins were then transferred onto nitrocellulose membranes. The membranes were blocked for 1 hour with 5% milk or BSA. For over-expression and siRNA experiments, the cells were lysed in 1% triton buffer without SDS to preserve their maximum HDAC activity. The lysates were used for activity assays and diluted with 3xLDS buffer for Western blot analysis.

## **Acylation of Fatty Acid Free Bovine Serum**

Fatty Acid Free Bovine Serum Albumin was purchased from Sigma. 10 mg was reacted with 1 mL of Valeryl Chloride (Sigma) or Acetic Anhydride (Acros) overnight at room temperature. These solutions were spun at 4°C at 15,000G for 15 minutes. The supernatant aspirated and the pelleted BSA resuspended in 1 mL of methanol. These washing and centrifugation steps were repeated 4 additional times. Residual volatiles were removed via lyophilization and the resulting dried pellet was resuspended in 1 mL of deionized water.

33.3 mg of Fatty Acid Free Bovine Serum Albumin was suspended in 5 mL of 99% Formic Acid (Sigma). The solution was raised to 65°C. 1.2 mL of Acetic Anhydride (Acros) was slowly dropped in via injection over 30 minutes. The solution was allowed to stir for 5 additional minutes before

quenching with 1.5 mL of distilled ice water. Volatiles were removed under reduced pressure at room temperature. Residual solution was removed via lyophilization. The resulting pellet was resuspended in 3.3 mL of distilled water. This methodology was adapted from du Vigneaud, Dorfmann, and Loring (1932).

### **Cross Sensitivity Verification of Formyl-, Acetyl-, and Valeryl-Lysine Antibodies.**

0.5  $\mu$ L of each solution (10 mg/mL) was dotted onto nitrocellulose using a 0.25  $\mu$ L – 2  $\mu$ L pipette fitted with 10  $\mu$ L pipette tip. After the cellulose was dried, it was transferred into a 5% (w/v) solution of Bovine Serum Albumin. 1:1000 (v/v) of respective primary antibody was added and allowed to rock overnight at room temperature. The cellulose was washed several times and appropriate secondary antibody was added (1:1000 (v/v)). This solution was rocked for 1 hour at room temperature before washing and imaging. Imaging was performed on GE ImageQuant LAS 4000.

### **Statistical Analysis**

All analyses were performed by GraphPad Prism. All calculations were Dunnett's Multiple Comparisons with a significance threshold set to 0.01.

### **Alignment of Class I HDACs**

Sequence alignments were performed using ClustalW with the BLOSUM62 similarity matrix.

## Supplementary Synthetic Methods and Characterization

### Acylated substrates synthesis:

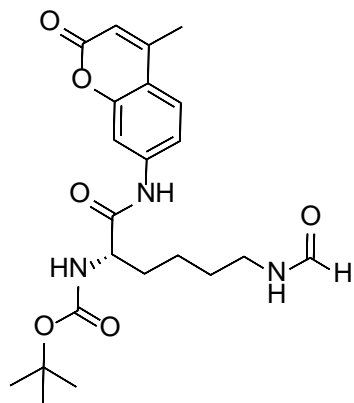

**Formyl-substrate.**  $N\alpha$ -(tert-Butoxycarbonyl)-L-Lysine-7-amido-4-methylcoumarin (100mg, 0.25 mmole) was dissolved in Dimethylformamide with catalytic amount of DIPEA. **Formyl-substrate** was generated by adding 2,2,2-Trifluoroethyl Formate (128 mg, 1 mmole 4 equiv) and reacted for 12 hours. The reaction mixture was injected directly into Combiflash instrument in HPLC format to obtain the desired product.  $^1\text{H}$  NMR (400 MHz, DMSO):  $\delta$  10.43 (s, 1H), 7.99 (s, 2H), 7.78 (d, 1H,  $J = 2$  Hz), 7.73 (d, 1H,  $J = 8$  Hz), 7.50 (d, 1H,  $J = 8$  Hz), 7.13 (d, 1H,  $J = 8$  Hz), 6.27 (s, 1H), 4.06 (m, 1H), 3.07 (m, 2H), 2.41 (s, 3H), 1.66-1.60 (m, 2H), 1.42-1.39 (m, 11H), 1.30-1.27 (m, 2H);  $^{13}\text{C}$  HSQC (400MHz, 100MHz, DMSO):  $\delta$  126.4, 115.7, 112.7, 106.1, 55.7, 37.4, 31.7, 29.3, 28.7, 28.6, 18.5.  $[(m+H^+)/z = 432.1]$

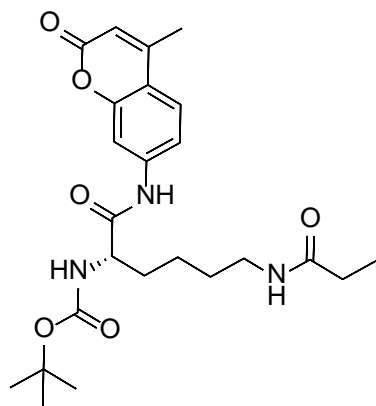

**Propionyl-substrate.**  $N\alpha$ -(tert-Butoxycarbonyl)-L-Lysine-7-amido-4-methylcoumarin (100mg, 0.25mmole) was dissolved in Dimethylformamide with catalytic amount of DIPEA. **Propionyl-substrate** was generated by adding propionyl chloride (92mg, 1mmole 4equiv) and reacted for 12 hours. The reaction mixture was injected directly into Combiflash instrument in HPLC format to obtain the desired product. 41% yield.  $^1\text{H}$  NMR (400 MHz, DMSO):  $\delta$  10.42 (s, 1H), 7.79 (d, 1H,  $J = 2$  Hz), 7.75-7.71 (m, 2H), 7.72 (d, 1H,  $J = 8$  Hz), 7.11 (d, 1H,  $J = 8$  Hz), 6.28 (s, 1H), 4.08-4.03 (m, 1H), 3.05-3.00 (m, 2H), 2.41 (s, 3H), 2.07-2.01 (q, 2H,  $J = 8$  Hz), 1.69-1.60 (m, 2H), 1.42-1.37 (m, 11H), 1.32-1.28 (m, 2H), 0.97 (t, 3H,  $J = 8$  Hz);  $^{13}\text{C}$  HSQC (400MHz, 100MHz, DMSO):  $\delta$  126.4, 115.7, 112.7, 106.1, 55.7, 38.6, 31.7, 29.0, 28.7, 28.6, 23.5, 18.5, 10.5. LC/MS:  $[(m+H^+)/z = 460.2]$

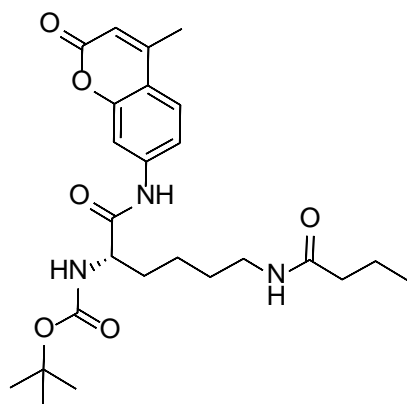

**Butyryl-substrate.** N $\alpha$ -(tert-Butoxycarbonyl)-L-Lysine-7-amido-4-methylcoumarin (100mg, 0.25 mmole) was dissolved in Dimethylformamide with catalytic amount of DIPEA. **Butyryl-substrate** was generated by adding butyryl chloride (107mg, 1 mmole 4 equiv) and reacted for 12 hours. The reaction mixture was injected directly into Combiflash instrument in HPLC format to obtain the desired product. <sup>1</sup>H NMR (400 MHz, DMSO):  $\delta$  10.42 (s, 1H), 7.79 (s, 1H), 7.75-7.73 (m, 2H), 7.50 (d, 1H, J = 8 Hz), 7.11 (d, 1H, J = 8 Hz), 6.28 (s, 1H), 4.07-4.04 (m, 1H), 3.05-3.01 (m, 2H), 2.41 (s, 3H), 2.00 (t, 2H, J = 7 Hz), 1.69-1.55 (m, 2H), 1.53-1.45 (m, 2H), 1.44-1.40 (m, 11), 1.31-1.28 (m, 2H), 0.82 (t, 3H, J = 8 Hz); <sup>13</sup>C HSQC (400MHz, 100MHz, DMSO):  $\delta$  126.4, 115.7, 112.7, 106.1, 55.7, 38.5, 37.9, 31.7, 28.7, 28.6, 23.5, 19.2, 18.5, 14.2. LC/MS: [(m+H<sup>+</sup>)/z = 474.1]

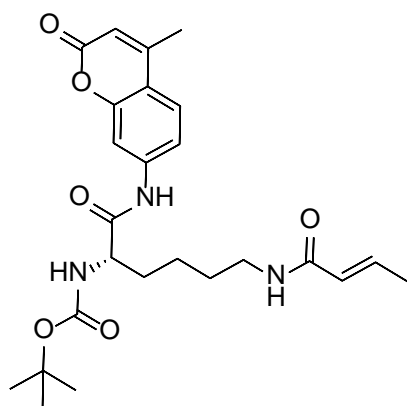

**Crotonyl-substrate.** N $\alpha$ -(tert-Butoxycarbonyl)-L-Lysine-7-amido-4-methylcoumarin (100mg, 0.25 mmole) was dissolved in Dimethylformamide with catalytic amount of DIPEA. **Crotonyl-substrate** was generated by adding crotonyl anhydride (105mg, 1 mmole 4 equiv) and reacted for 12 hours. The reaction mixture was injected directly into Combiflash instrument in HPLC format to obtain the desired product. <sup>1</sup>H NMR (400 MHz, DMSO):  $\delta$  10.42 (s, 1H), 7.86 (t, 1H, J = 6 Hz), 7.78 (s, 1H), 7.73 (d, 1H, J = 8 Hz), 7.50 (d, 1H, J = 8 Hz), 7.12 (d, 1H, J = 8 Hz), 6.61-6.55 (m, 1H), 6.27 (s, 1H), 5.87 (d, 1H, J = 11 Hz), 4.07-4.04 (m, 1H), 3.12-3.07 (m, 2H), 2.41 (s, 3H), 1.77 (d, 3H, J = 7 Hz), 1.67-1.60 (m, 2H), 1.45-1.39 (m, 11H), 1.32-1.29 (m, 2H); <sup>13</sup>C HSQC (400MHz, 100MHz, DMSO):  $\delta$  137.8, 126.5, 126.4, 115.7, 112.7, 106.1, 55.8, 31.7, 29.4, 28.7, 28.6, 23.5, 18.5, 17.8. [(m+H<sup>+</sup>)/z = 572.3]

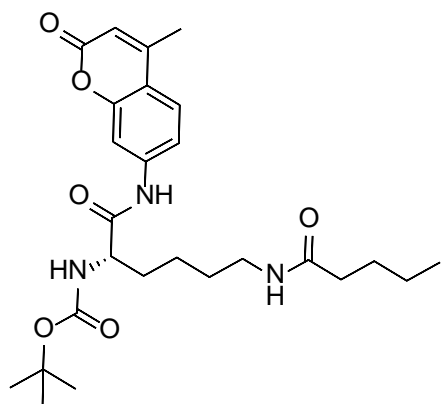

**Valeryl-substrate.** N $\alpha$ -(tert-Butoxycarbonyl)-L-Lysine-7-amido-4-methylcoumarin (100mg, 0.25 mmole) was dissolved in Dimethylformamide with catalytic amount of DIPEA. **Valeryl-substrate** was generated by adding valeryl chloride (121mg, 1 mmole 4 equiv) and reacted for 12 hours. The reaction mixture was injected directly into Combiflash instrument in HPLC format to obtain the desired product. <sup>1</sup>H NMR (400 MHz, DMSO):  $\delta$  10.43 (s, 1H), 7.79 (d, 1H, J = 2 Hz), 7.74-7.73 (m, 2H), 7.51 (d, 1H, J = 9 Hz), 7.11 (d, 1H, J = 8 Hz), 6.28 (s, 1H), 4.08-4.03 (m, 1H), 3.04-3.00 (m, 2H), 2.41 (s, 3H), 2.02 (t, 2H, J = 8 Hz), 1.65-1.62 (m, 2H), 1.47-1.40 (m, 13H), 1.29-1.22 (m, 4H), 0.84 (t, 3H, J = 8 Hz); <sup>13</sup>C HSQC (400MHz, 100MHz, DMSO):  $\delta$  126.4, 115.7, 112.7, 106.1, 55.7, 38.6, 35.6, 31.7, 27.9, 28.8, 28.7, 23.5, 22.3, 18.5, 14.2. [(m+H<sup>+</sup>)/z = 488.3]

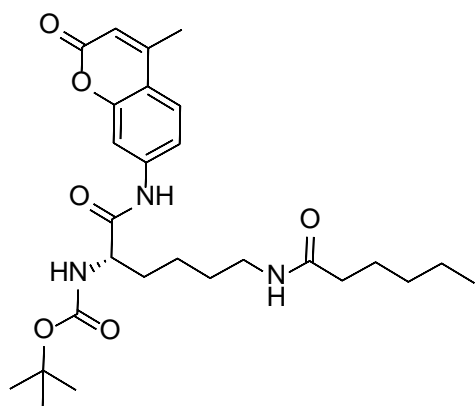

**Hexanoyl-substrate.** N $\alpha$ -(tert-Butoxycarbonyl)-L-Lysine-7-amido-4-methylcoumarin (100mg, 0.25 mmole) was dissolved in Dimethylformamide with catalytic amount of DIPEA. **Hexanoyl-substrate** was generated by adding hexanoyl chloride (135mg, 1 mmole 4 equiv) and reacted for 12 hours. The reaction mixture was injected directly into Combiflash instrument in HPLC format to obtain the desired product. <sup>1</sup>H NMR (400 MHz, DMSO):  $\delta$  10.42 (s, 1H), 7.79 (d, 1H, J = 1 Hz), 7.75-7.73 (m, 2H), 7.50 (d, 1H, J = 9 Hz), 7.11 (d, 1H, J = 8 Hz), 6.28 (s, 1H), 4.07-4.04 (m, 1H), 3.04-3.00 (m, 2H), 2.41 (s, 3H), 2.01 (t, 2H, J = 8 Hz), 1.67-1.60 (m, 2H), 1.45-1.39 (m, 13H), 1.29-1.18 (m, 6H), 0.84 (t, 3H, J = 7 Hz); <sup>13</sup>C HSQC (400MHz, 100MHz, DMSO):  $\delta$  126.4, 115.7, 112.7, 106.0, 55.7, 38.5, 35.9, 31.7, 31.4, 28.7, 28.5, 23.5, 22.3, 18.5, 14.3. [(m+H<sup>+</sup>)/z = 502.2]



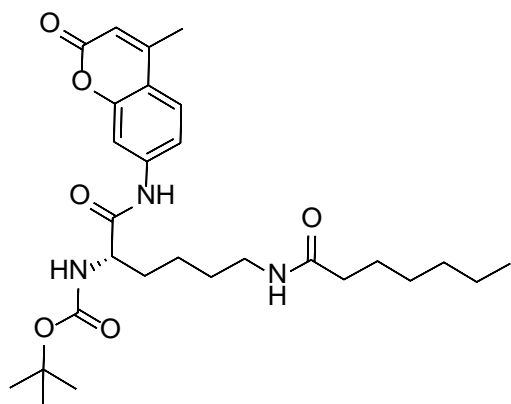

**Heptanoyl-substrate.** N $\alpha$ -(tert-Butoxycarbonyl)-L-Lysine-7-amido-4-methylcoumarin (100mg, 0.25 mmole) was dissolved in Dimethylformamide with catalytic amount of DIPEA. **Heptanoyl-substrate** was generated by adding Heptanoyl Chloride (149mg, 1 mmole 4 equiv) and reacted for 12 hours. The reaction mixture was injected directly into Combiflash instrument in HPLC format to obtain the desired product. <sup>1</sup>H NMR (400 MHz, DMSO):  $\delta$  10.42 (s, 1H), 7.79 (d, 1H, J = 2 Hz), 7.75-7.73 (m, 2H), 7.50 (d, 1H, J = 8 Hz), 7.10 (d, 1H, J = 8 Hz), 6.28 (s, 1H), 4.08-4.03 (m, 1H), 3.04-3.00 (m, 2H), 2.41 (s, 3H), 2.01 (t, 2H, J = 8 Hz), 1.69-1.61 (m, 2H), 1.44-1.39 (m, 13H), 1.29-1.20 (m, 8H), 0.85 (t, 3H, J = 7 Hz); <sup>13</sup>C HSQC (400MHz, 100MHz, DMSO):  $\delta$  126.4, 115.8, 112.8, 106.1, 55.7, 38.5, 35.9, 31.7, 31.4, 28.8, 28.7, 28.5, 25.7, 23.4, 22.5, 18.5, 14.4. [(m+H<sup>+</sup>)/z = 516.4]

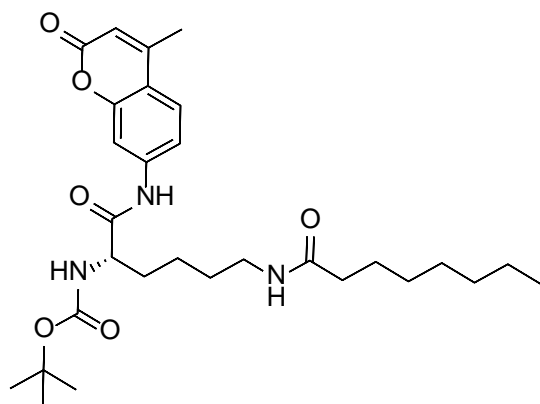

**Octanoyl-substrate.** N $\alpha$ -(tert-Butoxycarbonyl)-L-Lysine-7-amido-4-methylcoumarin (100mg, 0.25 mmole) was dissolved in Dimethylformamide with catalytic amount of DIPEA. **Octanoyl-substrate** was generated by adding Octanoyl Chloride (163mg, 1 mmole 4 equiv) and reacted for 12 hours. The reaction mixture was injected directly into Combiflash instrument in HPLC format to obtain the desired product. <sup>1</sup>H NMR (400 MHz, DMSO):  $\delta$  10.42 (s, 1H), 7.79 (d, 1H, J = 2 Hz), 7.75-7.73 (m, 2H), 7.50 (d, 1H, J = 8 Hz), 7.10 (d, 1H, J = 8 Hz), 6.28 (s, 1H), 4.07-4.03 (m, 1H), 3.04-3.00 (m, 2H), 2.41 (s, 3H), 2.01 (t, 2H, J = 8 Hz), 1.64-1.60 (m, 2H), 1.46-1.39 (m, 13H), 1.29-1.21 (m, 10H), 0.87-0.83 (m, 3H); <sup>13</sup>C HSQC (400MHz, 100MHz, DMSO):  $\delta$  126.3, 115.7, 112.7, 106.1, 55.7, 38.6, 35.9, 31.7, 31.6, 29.4, 28.9, 28.7, 28.5, 25.8, 23.4, 22.5, 18.5, 14.4. [(m+H<sup>+</sup>)/z = 530.2]

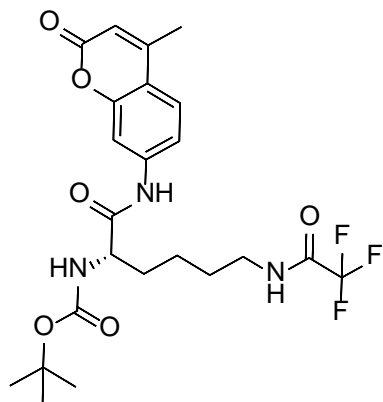

**TFA-substrate.** N $\alpha$ -(tert-Butoxycarbonyl)-L-Lysine-7-amido-4-methylcoumarin (100mg, 0.25 mmole) was dissolved in Dimethylformamide with catalytic amount of DIPEA. **TFA-substrate** was generated by adding trifluoroacetic anhydride (210mg, 1 mmole 4 equiv) and reacted for 12 hours. The reaction mixture was injected directly into Combiflash instrument in HPLC format to obtain the desired product. <sup>1</sup>H NMR (400 MHz, DMSO):  $\delta$  10.46 (s, 1H), 9.42 (t, 1H, J = 2 Hz), 7.78 (d, 1H, J = 2 Hz), 7.74 (d, 1H, J = 9 Hz), 7.50 (d, 1H, J = 9 Hz), 7.14 (d, 1H, J = 8 Hz), 6.28 (s, 1H), 4.09-4.05 (m, 1H), 3.20-3.16 (m, 2H), 2.41 (s, 3H), 1.69-1.60 (m, 2H), 1.55-1.46 (m, 2H), 1.39 (s, 9H), 1.34-1.25 (m, 2H); <sup>13</sup>C HSQC (400MHz, 100MHz, DMSO):  $\delta$  126.5, 115.7, 112.8, 106.1, 55.6, 39.5, 31.6, 28.7, 28.5, 28.4, 18.5. [(m+H<sup>+</sup>)/z = 500.2]

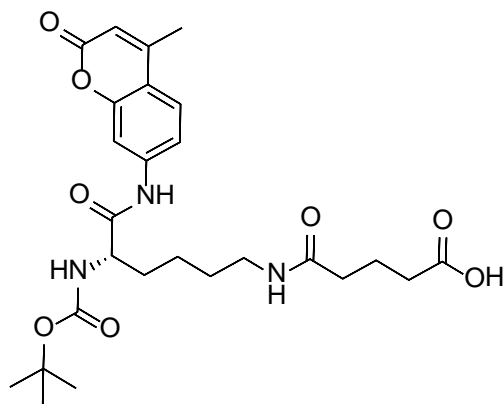

**Glutaryl-substrate.** N $\alpha$ -(tert-Butoxycarbonyl)-L-Lysine-7-amido-4-methylcoumarin (100mg, 0.25 mmole) was dissolved in Dimethylformamide with catalytic amount of DIPEA. **Glutaryl-substrate** was generated by adding glutaric anhydride (114mg, 1 mmole 4 equiv) and reacted for 12 hours. The reaction mixture was injected directly into Combiflash instrument in HPLC format to obtain the desired product. <sup>1</sup>H NMR (400 MHz, DMSO):  $\delta$  10.43 (s, 1H), 7.81-7.78 (m, 2H), 7.73 (d, 1H, J = 9 Hz), 7.50 (d, 1H, J = 9 Hz), 7.11 (d, 1H, J = 8 Hz), 6.27 (s, 1H), 4.08-4.03 (m, 1H), 3.34-3.01 (m, 2H), 2.41 (s, 3H), 2.18 (t, 2H, J = 8 Hz), 2.07 (t, 2H, J = 8 Hz), 1.73-1.60 (m, 4H), 1.45-1.38 (m, 13H); <sup>13</sup>C HSQC (400MHz, 100MHz, DMSO):  $\delta$  126.4, 115.7, 112.7, 106.1, 55.7, 38.6, 35.0, 33.6, 31.7, 29.4, 28.7, 28.6, 21.2, 18.5. [(m+H<sup>+</sup>)/z = 518.2]

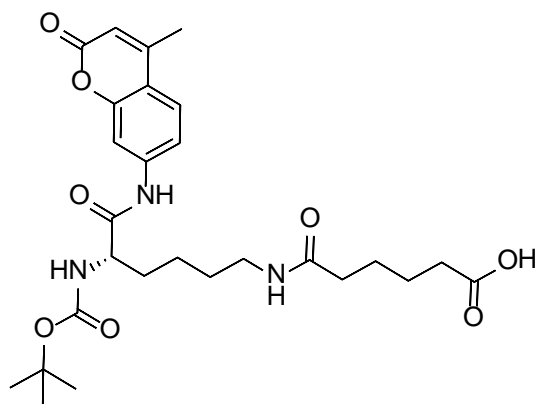

**Adipoyl-substrate**, N $\alpha$ -(tert-Butoxycarbonyl)-L-Lysine-7-amido-4-methylcoumarin (100mg, 0.25mmole) was dissolved in Dimethylformamide (DMF), 2-(1H-benzotriazol-1-yl)-1,1,3,3-tetramethyluronium hexafluorophosphate (HBTU), Hydroxybenzotriazole (HOBT), and adipic acid (1:1:1 equiv.) with catalytic amount of DIPEA were dissolved in DMF. **Adipoyl-substrate** was generated by dripping Boc-Lys-AMC solution slowly into the activated adipic acid solution (four equiv.) and reacted for 2 hours. The reaction mixture was stopped by adding water into the reaction and injected directly into Combiflash instrument in HPLC format to obtain the desired product. <sup>1</sup>H NMR (400 MHz, DMSO):  $\delta$  10.46 (s, 1H), 7.79-7.77 (m, 2H), 7.74 (d, 1H, J = 9 Hz), 7.51 (d, 1H, J = 9 Hz), 7.11 (d, 1H, J = 6 Hz), 6.28 (s, 1H), 4.06-4.04 (m, 1H), 3.04-3.01 (m, 2H), 2.41 (s, 3H), 2.18 (t, 2H, J = 7Hz), 2.03 (t, 2H, J = 7 Hz), 1.69-1.59 (m, 2H), 1.41-1.45 (m, 4H), 1.39 (s, 9H), 1.30-1.28 (m, 4H); <sup>13</sup>C HSQC (400MHz, 100MHz, DMSO):  $\delta$  126.4, 115.7, 112.7, 106.1, 55.8, 38.6, 35.6, 34.0, 31.7, 29.4, 28.7, 28.6, 24.8, 23.6, 18.5. [(m+H<sup>+</sup>)/z = 532.2]

### HDAC3 Inhibitors synthesis

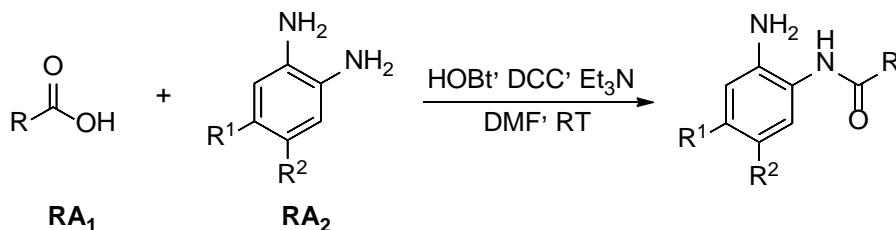

Carboxylic acid **RA**<sub>1</sub> (2 mmol, 1 equiv), HOBT (4 mmol, 2 equiv), and DCC (4 mmol, 2 equiv) were dissolved in 50 mL DMF, to which was added Et<sub>3</sub>N (4mmol, 2 equiv), and the resulting solution was stirred at room temperature for 30 mins. *o*-Phenylenediamine **RA**<sub>2</sub>(2 mmol, 1 equiv) was then added to the solution, and the mixture was stirred overnight. Pour the mixture into 100 mL water, and extract it with 250 mL ethyl acetate. The organic phase was washed with saturated NaHCO<sub>3</sub> and brine successively, and it was then dried over MgSO<sub>4</sub> and filtered. The filtrates were concentrated under vacuum, and the residue was purified by Combiflash instrument to obtain the desired product.

## HDAC3 Inhibitor Characterization

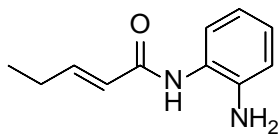

Compound **1**, (E)-N-(2-aminophenyl)pent-2-enamide, white solid, 28% yield.  $^1\text{H}$  NMR (400 MHz, DMSO):  $\delta$  9.23 (s, 1H), 7.24-7.22 (d,  $J = 7.6$  Hz, 1H), 6.92-6.78 (m, 2H), 6.73 (dd,  $J_1 = 8.0$  Hz,  $J_2 = 0.8$  Hz, 1H), 6.55 (td,  $J_1 = 7.2$  Hz,  $J_2 = 1.6$  Hz, 1H), 6.15 (d,  $J = 15.2$  Hz, 1H), 4.85 (br, 1H), 2.23-2.17 (m, 2H), 1.03 (t,  $J = 7.2$  Hz, 3H);  $^{13}\text{C}$  NMR (100 MHz, DMSO)  $\delta$  172.2, 164.1, 145.9, 142.2, 126.2, 125.4, 123.8, 116.8, 116.5, 25.0, 12.9. LC/MS: [(m+H<sup>+</sup>)/z = 191.25].

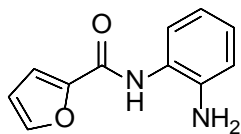

Compound **1a**, N-(2-aminophenyl)furan-2-carboxamide, white solid, 70% yield.  $^1\text{H}$  NMR (400 MHz, CDCl<sub>3</sub>):  $\delta$  8.20 (br, 1H), 7.45-7.44 (m, 1H), 7.34 (d,  $J = 8.0$  Hz, 1H), 7.18 (d,  $J = 3.2$  Hz, 1H), 7.04-7.01 (m, 1H), 6.80-6.76 (m, 2H), 6.52-6.51 (m, 1H), 3.91 (br, 2H);  $^{13}\text{C}$  NMR (100 MHz, CDCl<sub>3</sub>)  $\delta$  156.6, 147.6, 144.5, 140.8, 127.2, 125.3, 123.6, 119.5, 118.1, 115.3, 112.4. LC/MS: [(m+H<sup>+</sup>)/z = 203.33].

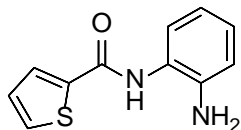

Compound **1b**, N-(2-aminophenyl)thiophene-2-carboxamide, white solid, 62% yield.  $^1\text{H}$  NMR (400 MHz, DMSO):  $\delta$  9.74 (s, 1H), 7.98-7.97 (m, 1H), 7.79 (dd,  $J_1 = 4.8$  Hz,  $J_2 = 1.2$  Hz, 1H), 7.21-7.19 (m, 1H), 7.13-7.11 (m, 1H), 7.01-6.97 (m, 1H), 6.78 (dd,  $J_1 = 8.0$  Hz,  $J_2 = 0.8$  Hz, 1H), 6.63-6.59 (m, 1H), 5.50-3.50 (br, 2H);  $^{13}\text{C}$  NMR (100 MHz, DMSO)  $\delta$  160.5, 143.6, 140.3, 131.8, 129.6, 128.5, 127.4, 127.3, 123.2, 117.0, 116.7. LC/MS: [(m+H<sup>+</sup>)/z = 219.19].

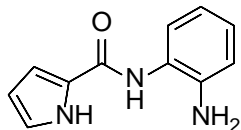

Compound **1c**, N-(2-aminophenyl)-1H-pyrrole-2-carboxamide, white solid, 31% yield.  $^1\text{H}$  NMR (400 MHz, DMSO):  $\delta$  11.6 (s, 1H), 9.32 (s, 1H), 7.17-7.14 (m, 1H), 7.02-6.93 (m, 4H), 6.80-6.78 (m, 1H), 6.63-6.59 (m, 2H), 6.19-6.17 (m, 1H), 4.86 (br, 2H).  $^{13}\text{C}$  NMR (100 MHz, DMSO)  $\delta$  159.8, 143.4, 126.9, 126.6, 126.4, 123.9, 122.5, 117.0, 116.7, 111.7, 109.3. LC/MS: [(m+H<sup>+</sup>)/z = 202.23].

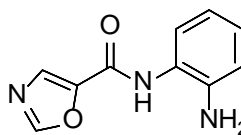

Compound **1d**, N-(2-aminophenyl)oxazole-5-carboxamide, white solid, 44% yield.  $^1\text{H}$  NMR (400 MHz, DMSO):  $\delta$  9.80 (s, 1H), 8.59 (s, 1H), 7.93 (s, 1H), 7.12-7.10 (m, 1H), 7.01-6.97 (m, 1H),

6.78-6.76 (m, 1H), 6.61 (m, 1H), 4.94 (br, 2H).  $^{13}\text{C}$  NMR (100 MHz, DMSO)  $\delta$  155.7, 154.0, 145.8, 143.8, 130.1, 127.5, 127.4, 122.0, 116.7, 116.5. LC/MS: [(m+H<sup>+</sup>)/z = 204.19].

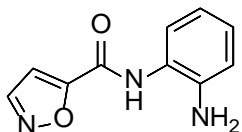

Compound **1e**, N-(2-aminophenyl)isoxazole-5-carboxamide, white solid, 22% yield.  $^1\text{H}$  NMR (400 MHz, DMSO):  $\delta$  10.08 (s, 1H), 8.77 (d,  $J$  = 1.6 Hz, 1H), 7.20 (d,  $J$  = 1.6 Hz, 1H), 7.13-7.10 (m, 1H), 7.02-6.98 (m, 1H), 6.79-6.76 (m, 1H), 6.61-6.57 (m, 1H), 4.99 (br, 2H).  $^{13}\text{C}$  NMR (100 MHz, DMSO)  $\delta$  163.2, 154.9, 152.1, 144.0, 127.8, 127.5, 121.7, 116.6, 116.5, 106.9. LC/MS: [(m+H<sup>+</sup>)/z = 204.17].

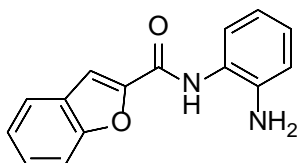

Compound **1f**, N-(2-aminophenyl)benzofuran-2-carboxamide, white solid, 75% yield.  $^1\text{H}$  NMR (400 MHz, DMSO):  $\delta$  9.94 (s, 1H), 7.81 (d,  $J$  = 8.0 Hz, 1H), 7.73-7.69 (m, 2H), 7.51-7.47 (m, 1H), 7.37-7.33 (m, 1H), 7.23-7.21 (m, 1H), 7.03-6.99 (m, 1H), 6.84-6.81 (m, 1H), 6.65 (m, 1H), 4.98 (br, 2H).  $^{13}\text{C}$  NMR (100 MHz, DMSO)  $\delta$  157.4, 154.8, 149.4, 143.6, 127.6, 127.4(127.4), 127.2, 124.2, 123.3, 122.7, 116.9, 116.7, 112.3, 110.7. LC/MS: [(m+H<sup>+</sup>)/z = 253.23].

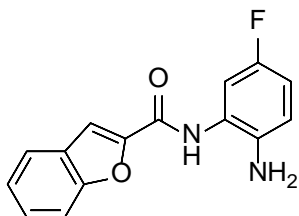

Compound **2**, N-(2-amino-5-fluorophenyl)benzofuran-2-carboxamide, white solid, 80% yield.  $^1\text{H}$  NMR (400 MHz, DMSO):  $\delta$  9.88 (s, 1H), 7.83-7.81 (m, 1H), 7.74-7.70 (m, 2H), 7.52-7.48 (m, 1H), 7.39-7.35 (m, 1H), 7.20-7.16 (m, 1H), 6.62-6.58 (m, 1H), 6.42-6.38 (m, 1H), 5.35 (s, 2H).  $^{13}\text{C}$  NMR (100 MHz, DMSO)  $\delta$  161.8 (d,  $J$  = 239 Hz), 157.7, 154.8, 149.5, 146.1 (d,  $J$  = 13.3 Hz), 129.2 (d,  $J$  = 11.7 Hz), 127.6, 127.4, 124.2, 123.3, 118.6, 112.3, 110.6, 102.6 (d,  $J$  = 23.4 Hz), 102.0 (d,  $J$  = 25.1 Hz).  $^{19}\text{F}$  NMR (400 MHz, DMSO):  $\delta$  -115.9. LC/MS: [(m+H<sup>+</sup>)/z = 271.17].

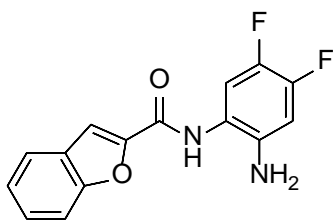

Compound **2a**, N-(2-amino-4,5-difluorophenyl)benzofuran-2-carboxamide, white solid, 78% yield.  $^1\text{H}$  NMR (400 MHz, DMSO):  $\delta$  9.89 (br, 1H), 7.83-7.81 (m, 1H), 7.73-7.70 (m, 2H), 7.52-7.48 (m, 1H), 7.38-7.28 (m, 2H), 6.77-6.72 (m, 1H), 5.19 (s, 2H).  $^{13}\text{C}$  NMR (100 MHz, DMSO)  $\delta$  157.6,

154.8, 149.2, 141.4, 141.3, 127.6, 127.5, 124.3, 123.3, 118.1, 116.0, 115.8, 112.3, 111.0, 103.6, 103.4.  $^{19}\text{F}$  NMR (400 MHz, DMSO):  $\delta$  -140.9, -153.8. LC/MS: [(m+H<sup>+</sup>)/z = 289.08]

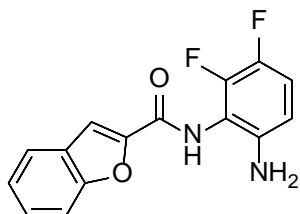

Compound **2b**, N-(6-amino-2,3-difluorophenyl)benzofuran-2-carboxamide, white solid, 66% yield.  $^1\text{H}$  NMR (400 MHz, DMSO):  $\delta$  10.0 (s, 1H), 7.83 (d, J = 3.86 Hz, 1H), 7.2 (d, J = 5.40 Hz, 2H), 7.51 (t, J = 2.74 Hz, 1H), 7.37 (t, J = 2.75 Hz, 1H), 7.02-6.98 (m, 1H), 6.58 (q, J = 6.85 Hz, 1H), 5.41 (s, 2H).  $^{13}\text{C}$  NMR (100 MHz, DMSO):  $\delta$  157.8, 154.8, 149.3, 140.5, 138.2, 135.0, 127.6, 127.5, 124.2, 123.3, 119.9, 112.3, 110.8, 102.7, 102.5.  $^{19}\text{F}$  NMR (400 MHz, DMSO):  $\delta$  -141.5, -158.2. LC/MS [(m+H<sup>+</sup>)/z = 289.08].

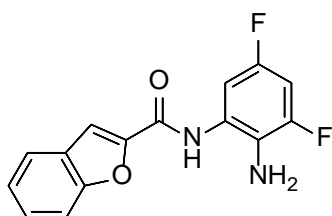

Compound **2c**, N-(2-amino-3,5-difluorophenyl)benzofuran-2-carboxamide, light orange solid, 54% yield.  $^1\text{H}$  NMR (400 MHz, DMSO):  $\delta$  9.72 (s, 1H), 7.82 (d, J = 3.72 Hz, 1H), 7.72-7.70 (m, 2H), 7.50 (t, J = 5.66 Hz, 1H), 7.37 (t, J = 5.66 Hz, 1H), 6.39-6.33 (m, 2H), 5.73 (s, 1H).  $^{13}\text{C}$  NMR (100 MHz, DMSO):  $\delta$  163.0, 160.8, 158.1, 154.8, 149.2, 127.6, 127.5, 124.2, 123.3, 112.3, 110.8, 106.0, 105.8, 96.8, 90.9.  $^{19}\text{F}$  NMR (400 MHz, DMSO):  $\delta$  -112.7, -117.2. LC/MS [(m+H<sup>+</sup>)/z = 289.08].

1H NMR of Formyl-substrate

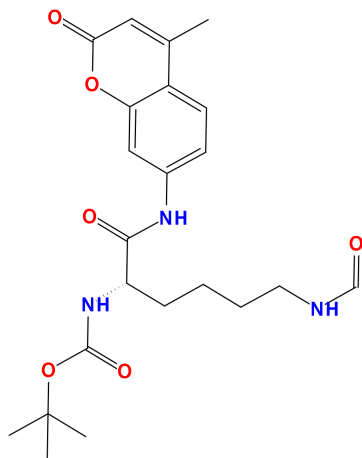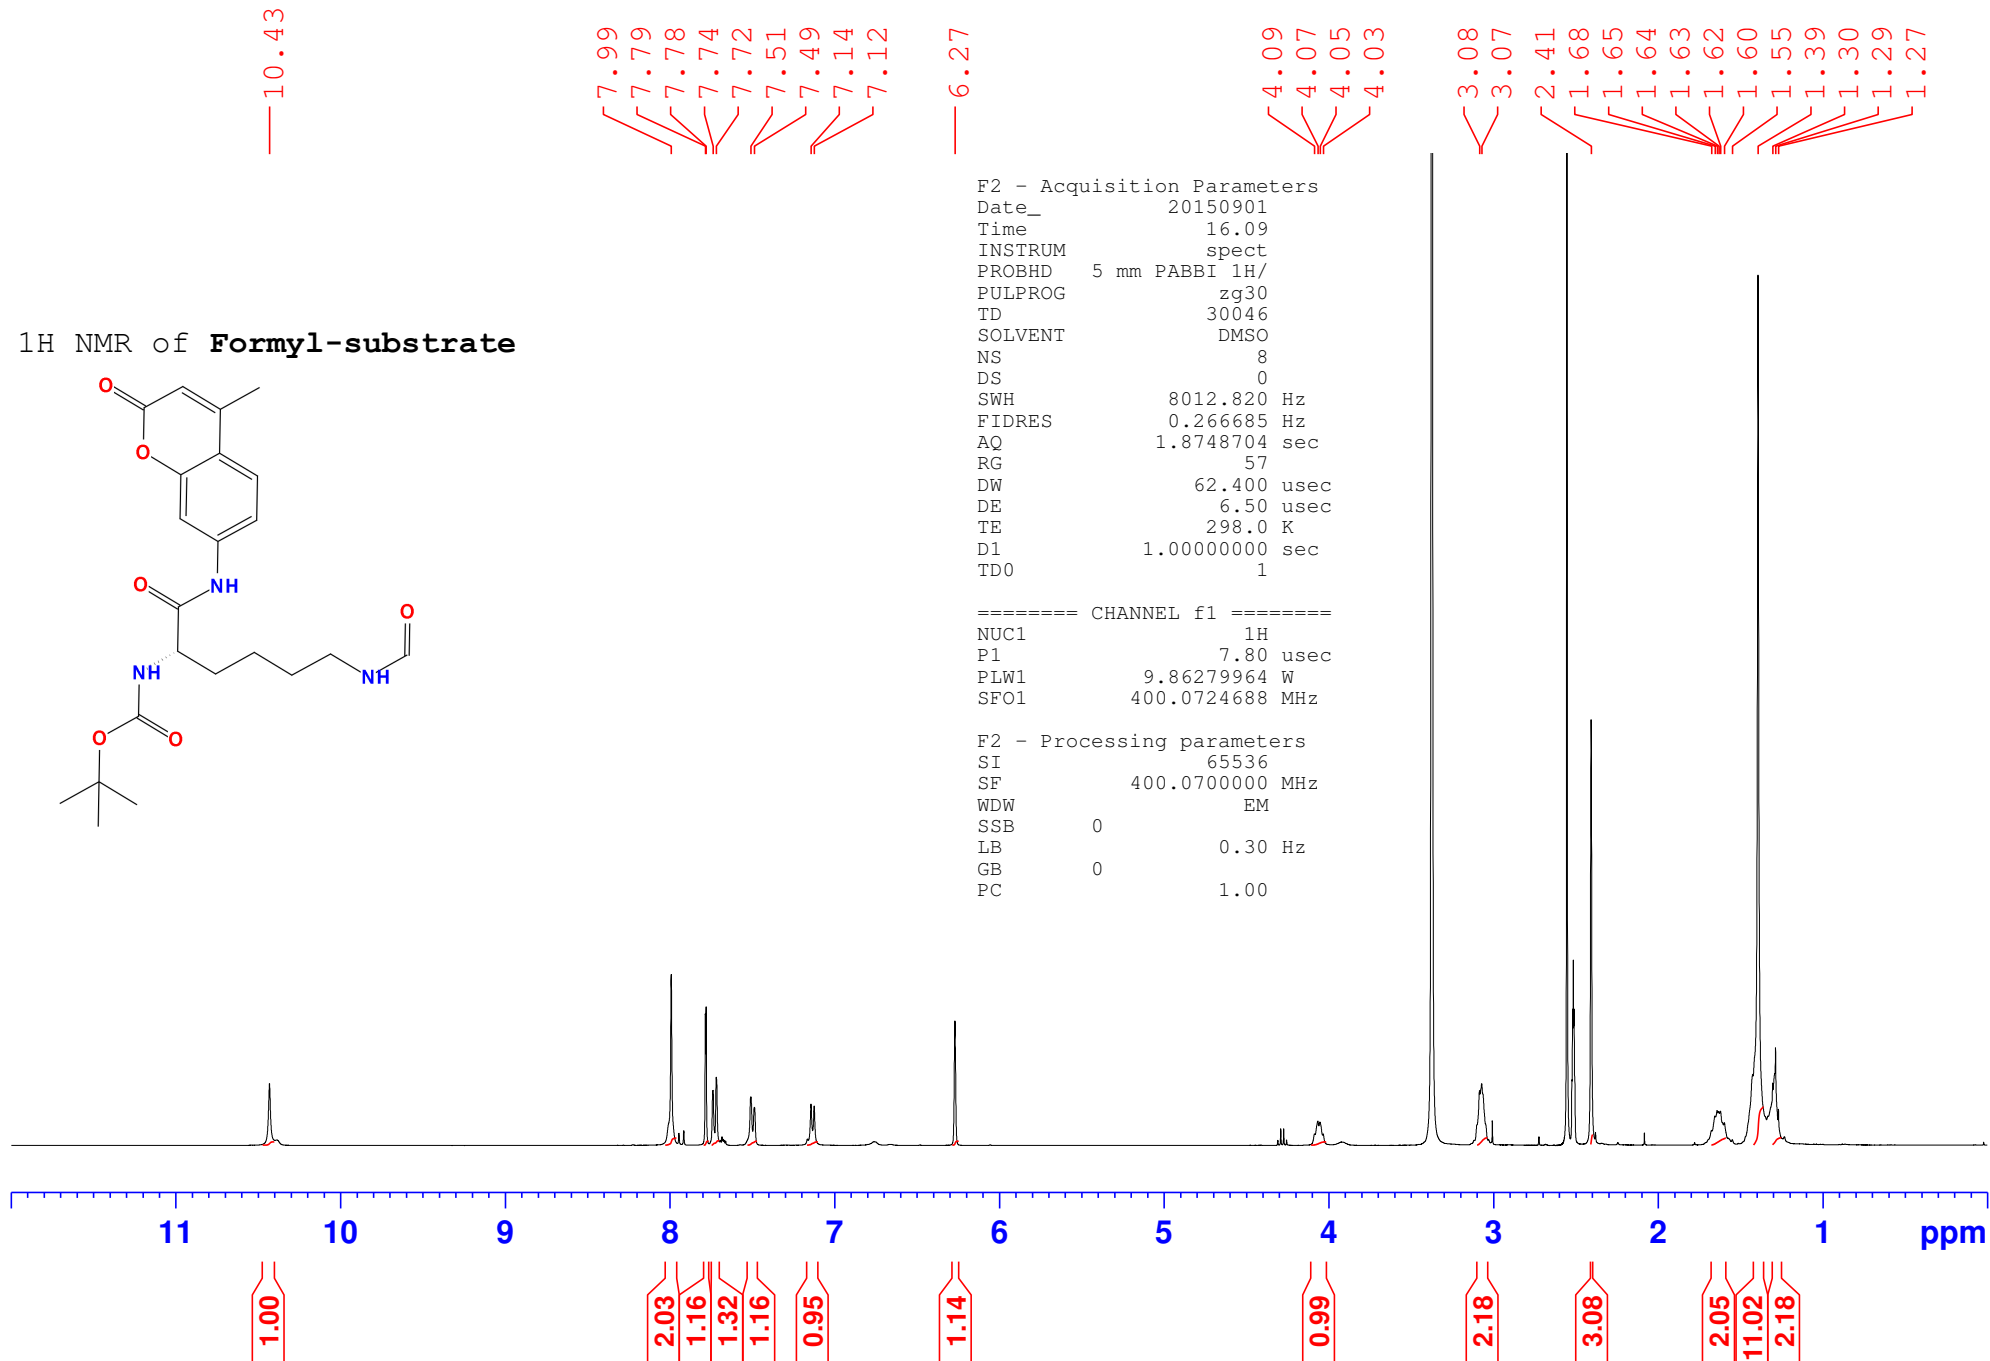

F2 - Acquisition Parameters  
 Date\_ 20150901  
 Time 16.09  
 INSTRUM spect  
 PROBHD 5 mm PABBI 1H/  
 PULPROG zg30  
 TD 30046  
 SOLVENT DMSO  
 NS 8  
 DS 0  
 SWH 8012.820 Hz  
 FIDRES 0.266685 Hz  
 AQ 1.8748704 sec  
 RG 57  
 DW 62.400 usec  
 DE 6.50 usec  
 TE 298.0 K  
 D1 1.00000000 sec  
 D10 1

==== CHANNEL f1 =====  
 NUC1 1H  
 P1 7.80 usec  
 PLW1 9.86279964 W  
 SFO1 400.0724688 MHz

F2 - Processing parameters  
 SI 65536  
 SF 400.0700000 MHz  
 WDW EM  
 SSB 0  
 LB 0.30 Hz  
 GB 0  
 PC 1.00

ppm

## HSQC of Formyl-substrate

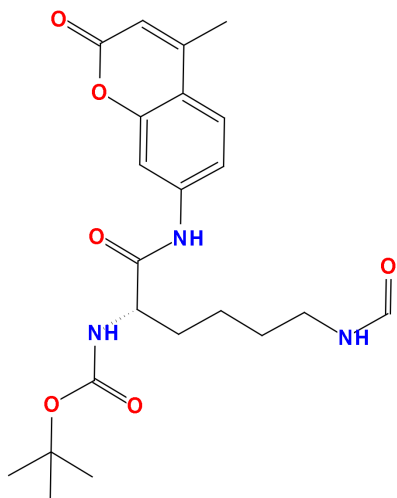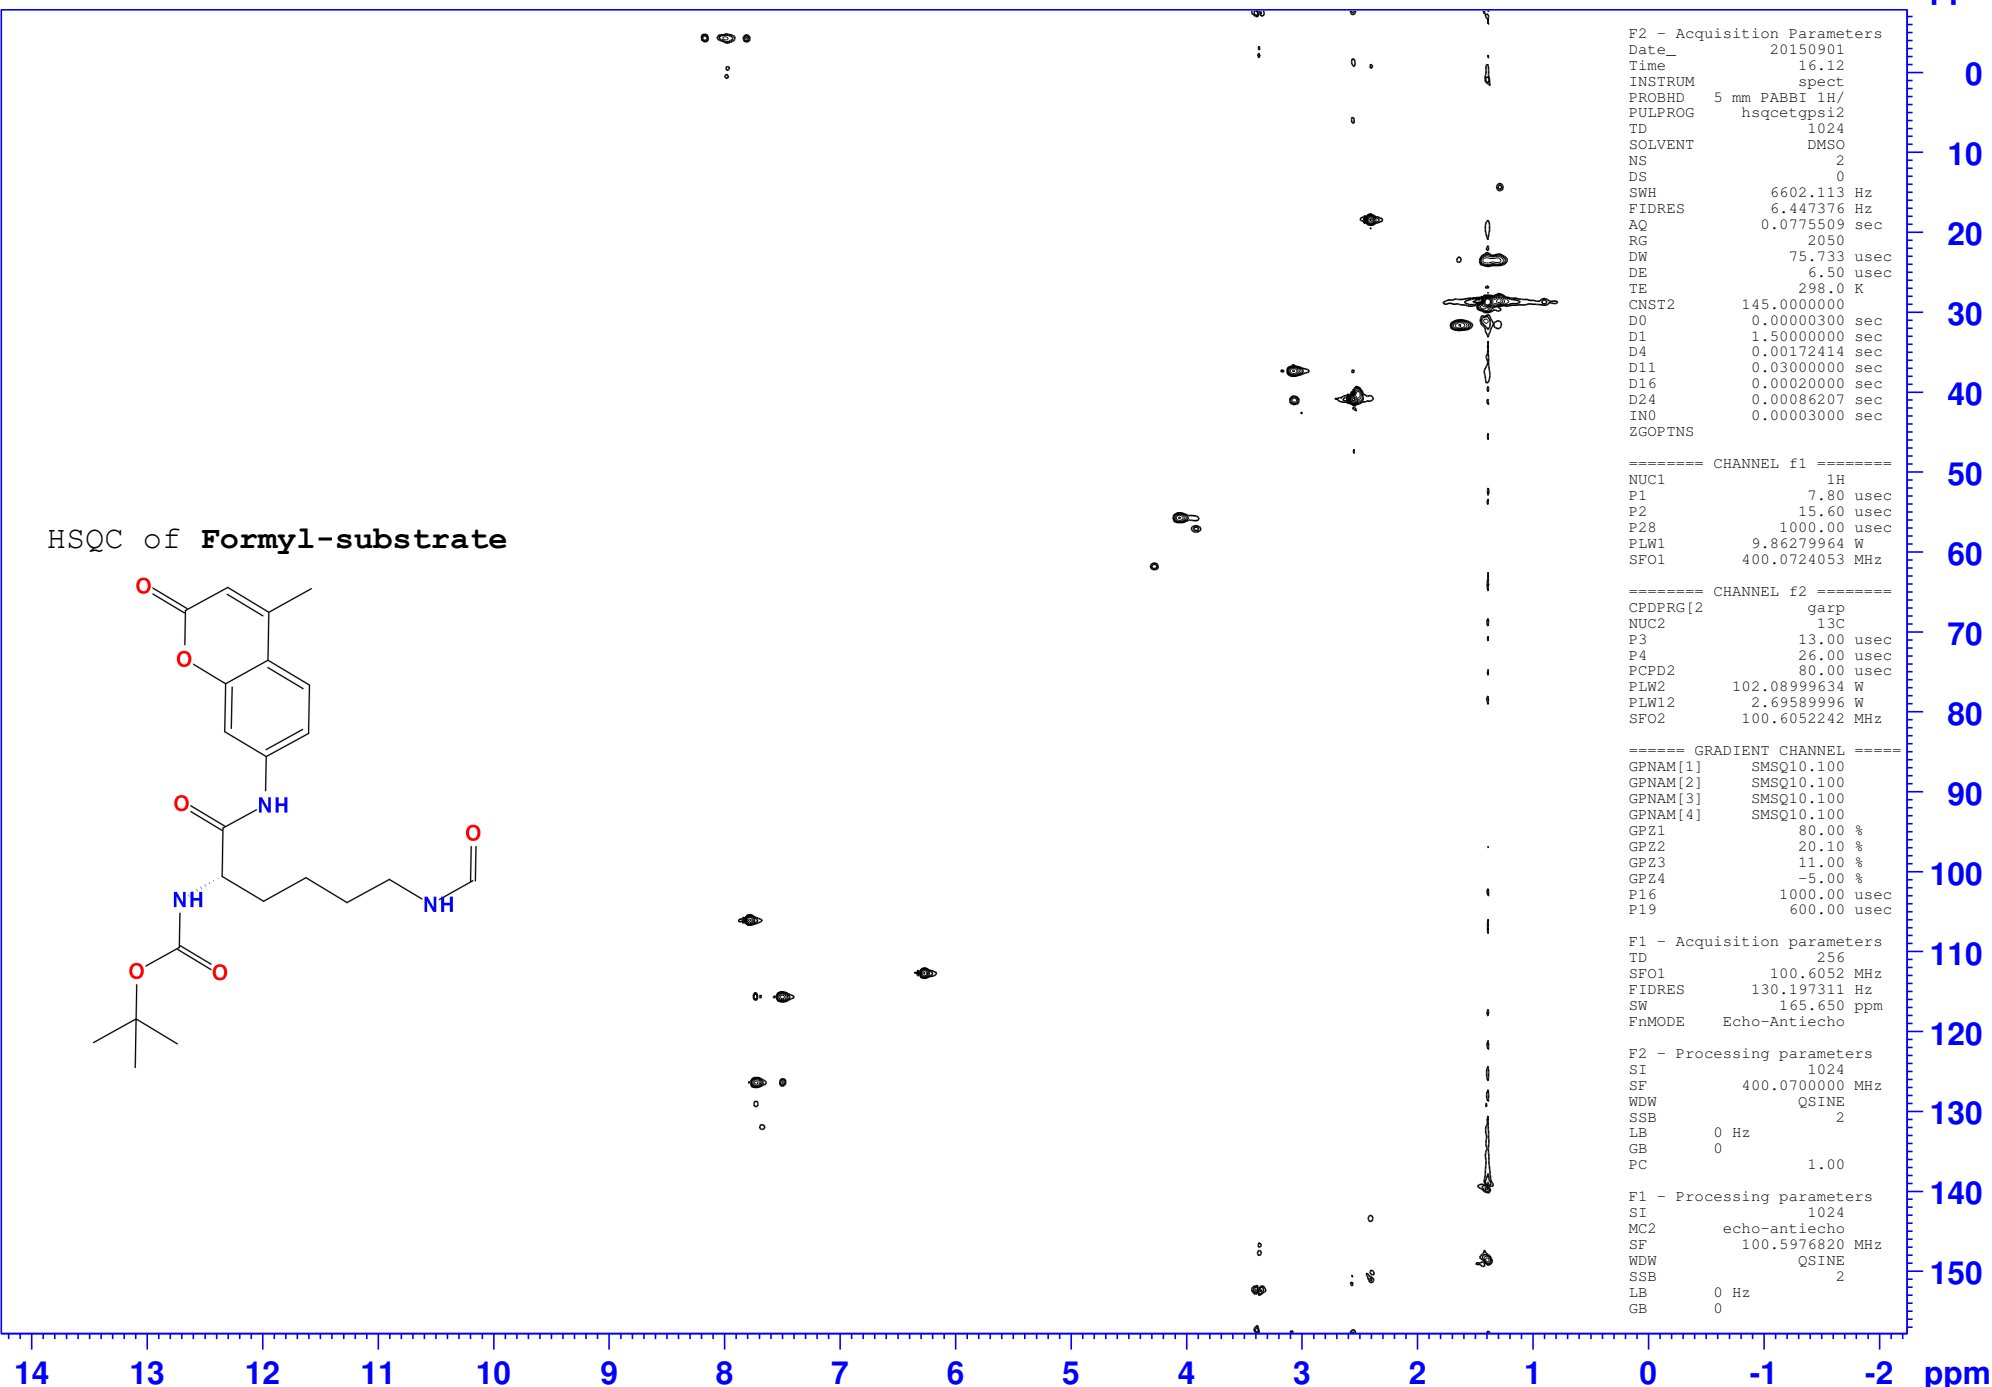

F2 - Acquisition Parameters  
 Date\_ 20150901  
 Time 16.12  
 INSTRUM spect  
 PROBHD 5 mm PABBI 1H/  
 PULPROG hsqcetgpsi2  
 TD 1024  
 SOLVENT DMSO  
 NS 2  
 DS 0  
 SWH 6602.113 Hz  
 FIDRES 6.447376 Hz  
 AQ 0.0775509 sec  
 RG 2050  
 DW 75.733 usec  
 DE 6.50 usec  
 TE 298.0 K  
 CNST2 145.0000000  
 D0 0.0000300 sec  
 D1 1.5000000 sec  
 D4 0.00172414 sec  
 D11 0.03000000 sec  
 D16 0.00020000 sec  
 D24 0.00086207 sec  
 IN0 0.00003000 sec  
 ZGPTNS

===== CHANNEL f1 =====  
 NUC1 1H  
 P1 7.80 usec  
 P2 15.60 usec  
 P28 1000.00 usec  
 PLW1 9.86279964 W  
 SFO1 400.0724053 MHz

===== CHANNEL f2 =====  
 CPDPRG[2] garp  
 NUC2 13C  
 P3 13.00 usec  
 P4 26.00 usec  
 PCPD2 80.00 usec  
 PLW2 102.08999634 W  
 PLW12 2.69589996 W  
 SFO2 100.6052242 MHz

===== GRADIENT CHANNEL =====  
 GPNAM[1] SMSQ10.100  
 GPNAM[2] SMSQ10.100  
 GPNAM[3] SMSQ10.100  
 GPNAM[4] SMSQ10.100  
 GPZ1 80.00 %  
 GPZ2 20.10 %  
 GPZ3 11.00 %  
 GPZ4 -5.00 %  
 P16 1000.00 usec  
 P19 600.00 usec

F1 - Acquisition parameters  
 TD 256  
 SFO1 100.6052 MHz  
 FIDRES 130.197311 Hz  
 SW 165.650 ppm  
 FnmODE Echo-Antiecho

F2 - Processing parameters  
 SI 1024  
 SF 400.0700000 MHz  
 WDW QSINE  
 SSB 2  
 LB 0 Hz  
 GB 0  
 PC 1.00

F1 - Processing parameters  
 SI 1024  
 MC2 echo-antiecho  
 SF 100.5976820 MHz  
 WDW QSINE  
 SSB 2  
 LB 0 Hz  
 GB 0



<sup>1</sup>H NMR of Propionyl-substrate

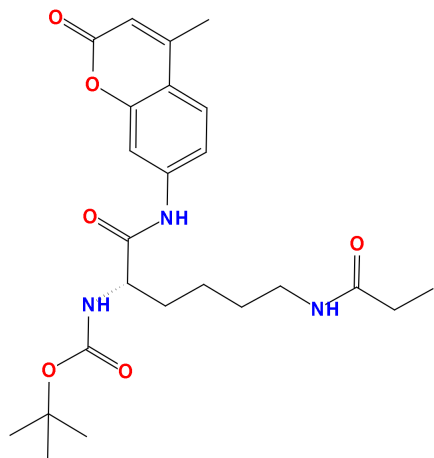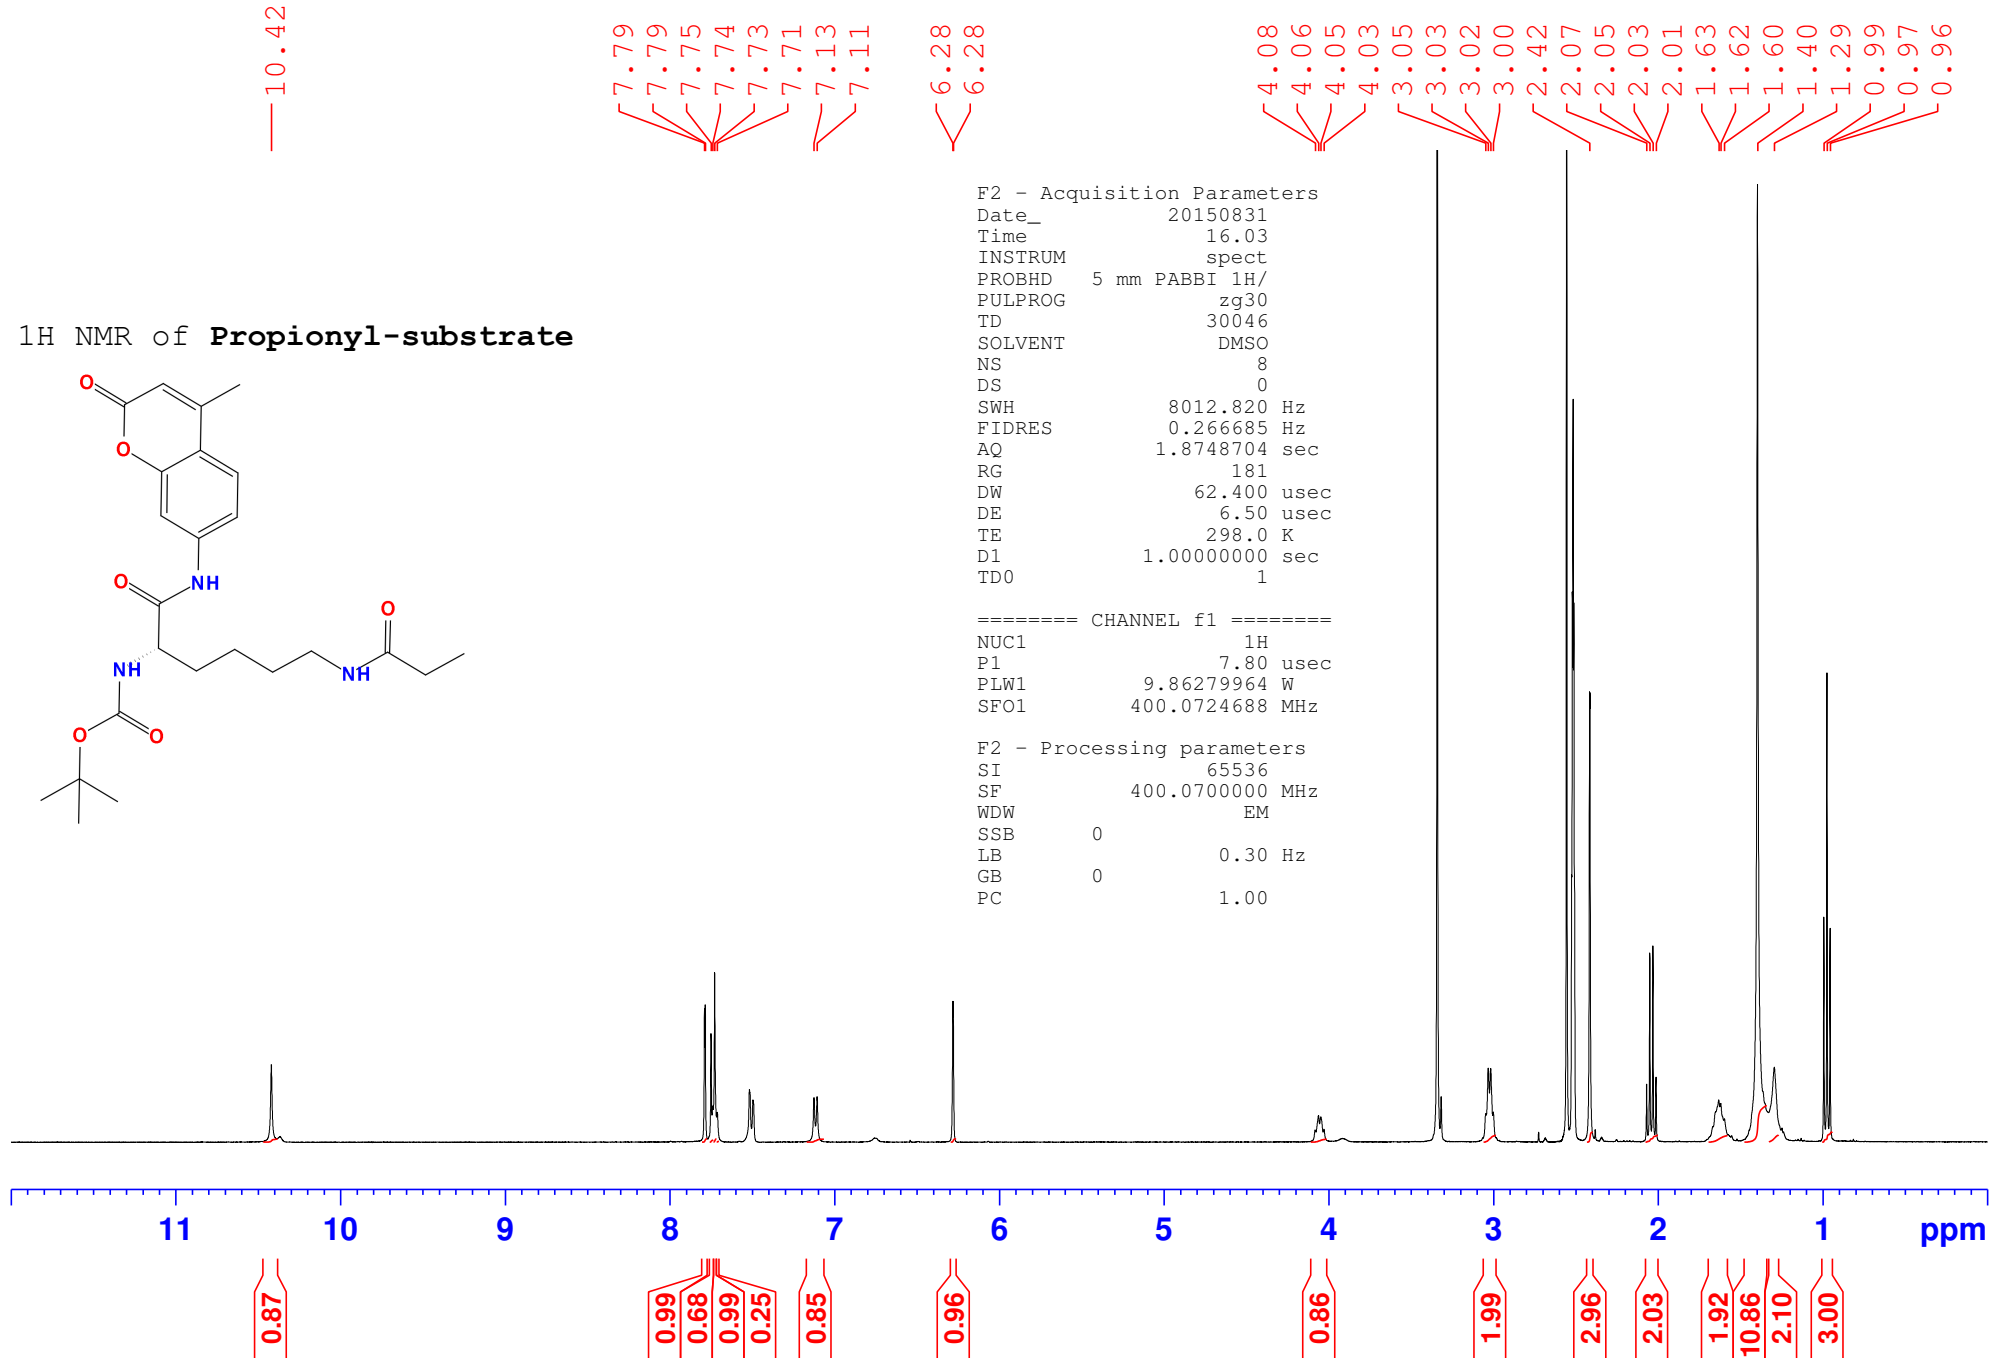

F2 - Acquisition Parameters  
 Date\_ 20150831  
 Time 16.03  
 INSTRUM spect  
 PROBHD 5 mm PABBI 1H/  
 PULPROG zg30  
 TD 30046  
 SOLVENT DMSO  
 NS 8  
 DS 0  
 SWH 8012.820 Hz  
 FIDRES 0.266685 Hz  
 AQ 1.8748704 sec  
 RG 181  
 DW 62.400 usec  
 DE 6.50 usec  
 TE 298.0 K  
 D1 1.00000000 sec  
 TD0 1

==== CHANNEL f1 =====  
 NUC1 1H  
 P1 7.80 usec  
 PLW1 9.86279964 W  
 SFO1 400.0724688 MHz

F2 - Processing parameters  
 SI 65536  
 SF 400.0700000 MHz  
 WDW EM  
 SSB 0  
 LB 0.30 Hz  
 GB 0  
 PC 1.00

ppm

0

10

20

30

40

50

60

70

80

90

100

110

120

130

140

150

ppm

S26

## HSQC of Propionyl-substrate

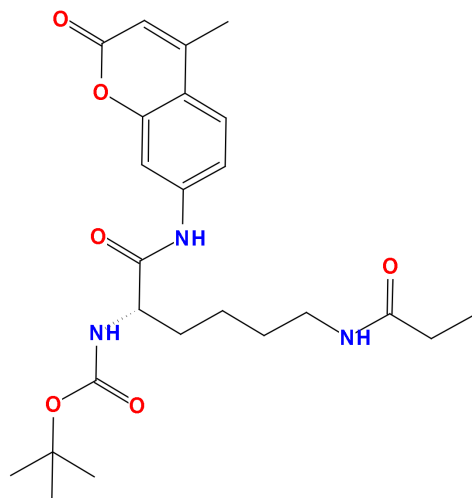

```

F2 - Acquisition Parameters
Date_ 20150831
Time 16.31
INSTRUM spect
PROBHD 5 mm PABBI 1H/
PULPROG hsqcetgpsi2
TD 1024
SOLVENT DMSO
NS 2
DS 0
SWH 5330.490 Hz
FIDRES 5.205557 Hz
AQ 0.0960512 sec
RG 2050
DW 93.800 usec
DE 6.50 usec
TE 298.0 K
CNST2 145.0000000
D0 0.000003000 sec
D1 1.500000000 sec
D4 0.00172414 sec
D11 0.030000000 sec
D16 0.000200000 sec
D24 0.00086207 sec
IN0 0.00003000 sec
ZGPTNS

===== CHANNEL f1 =====
NUC1 1H
P1 7.80 usec
P2 15.60 usec
P28 1000.00 usec
PLW1 9.86279964 W
SFO1 400.0724053 MHz

===== CHANNEL f2 =====
CPDPRG2 garp
NUC2 13C
P3 13.00 usec
P4 26.00 usec
PCPD2 80.00 usec
PLW2 102.08999634 W
PLW12 2.69589996 W
SFO2 100.6052242 MHz

===== GRADIENT CHANNEL =====
GPNAM[1] SMSQ10.100
GPNAM[2] SMSQ10.100
GPNAM[3] SMSQ10.100
GPNAM[4] SMSQ10.100
GPZ1 80.00 %
GPZ2 20.10 %
GPZ3 11.00 %
GPZ4 -5.00 %
P16 1000.00 usec
P19 600.00 usec

F1 - Acquisition parameters
TD 256
SFO1 100.6052 MHz
FIDRES 130.197311 Hz
SW 165.650 ppm
FnMODE Echo-Antiecho

F2 - Processing parameters
SI 1024
SF 400.0700000 MHz
WDW QSINE
SSB 2
LB 0 Hz
GB 0
PC 1.00

F1 - Processing parameters
SI 1024
MC2 echo-antiecho
SF 100.5976820 MHz
WDW QSINE
SSB 2
LB 0 Hz
GB 0

```

1H NMR of Butyryl-substrate

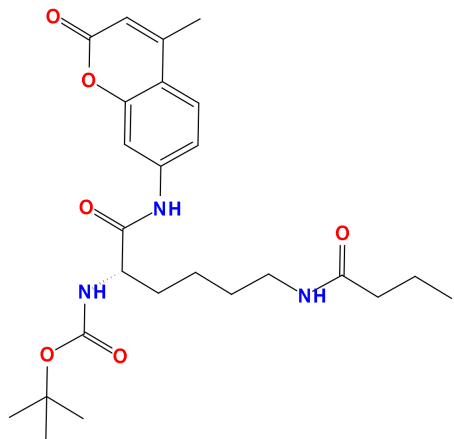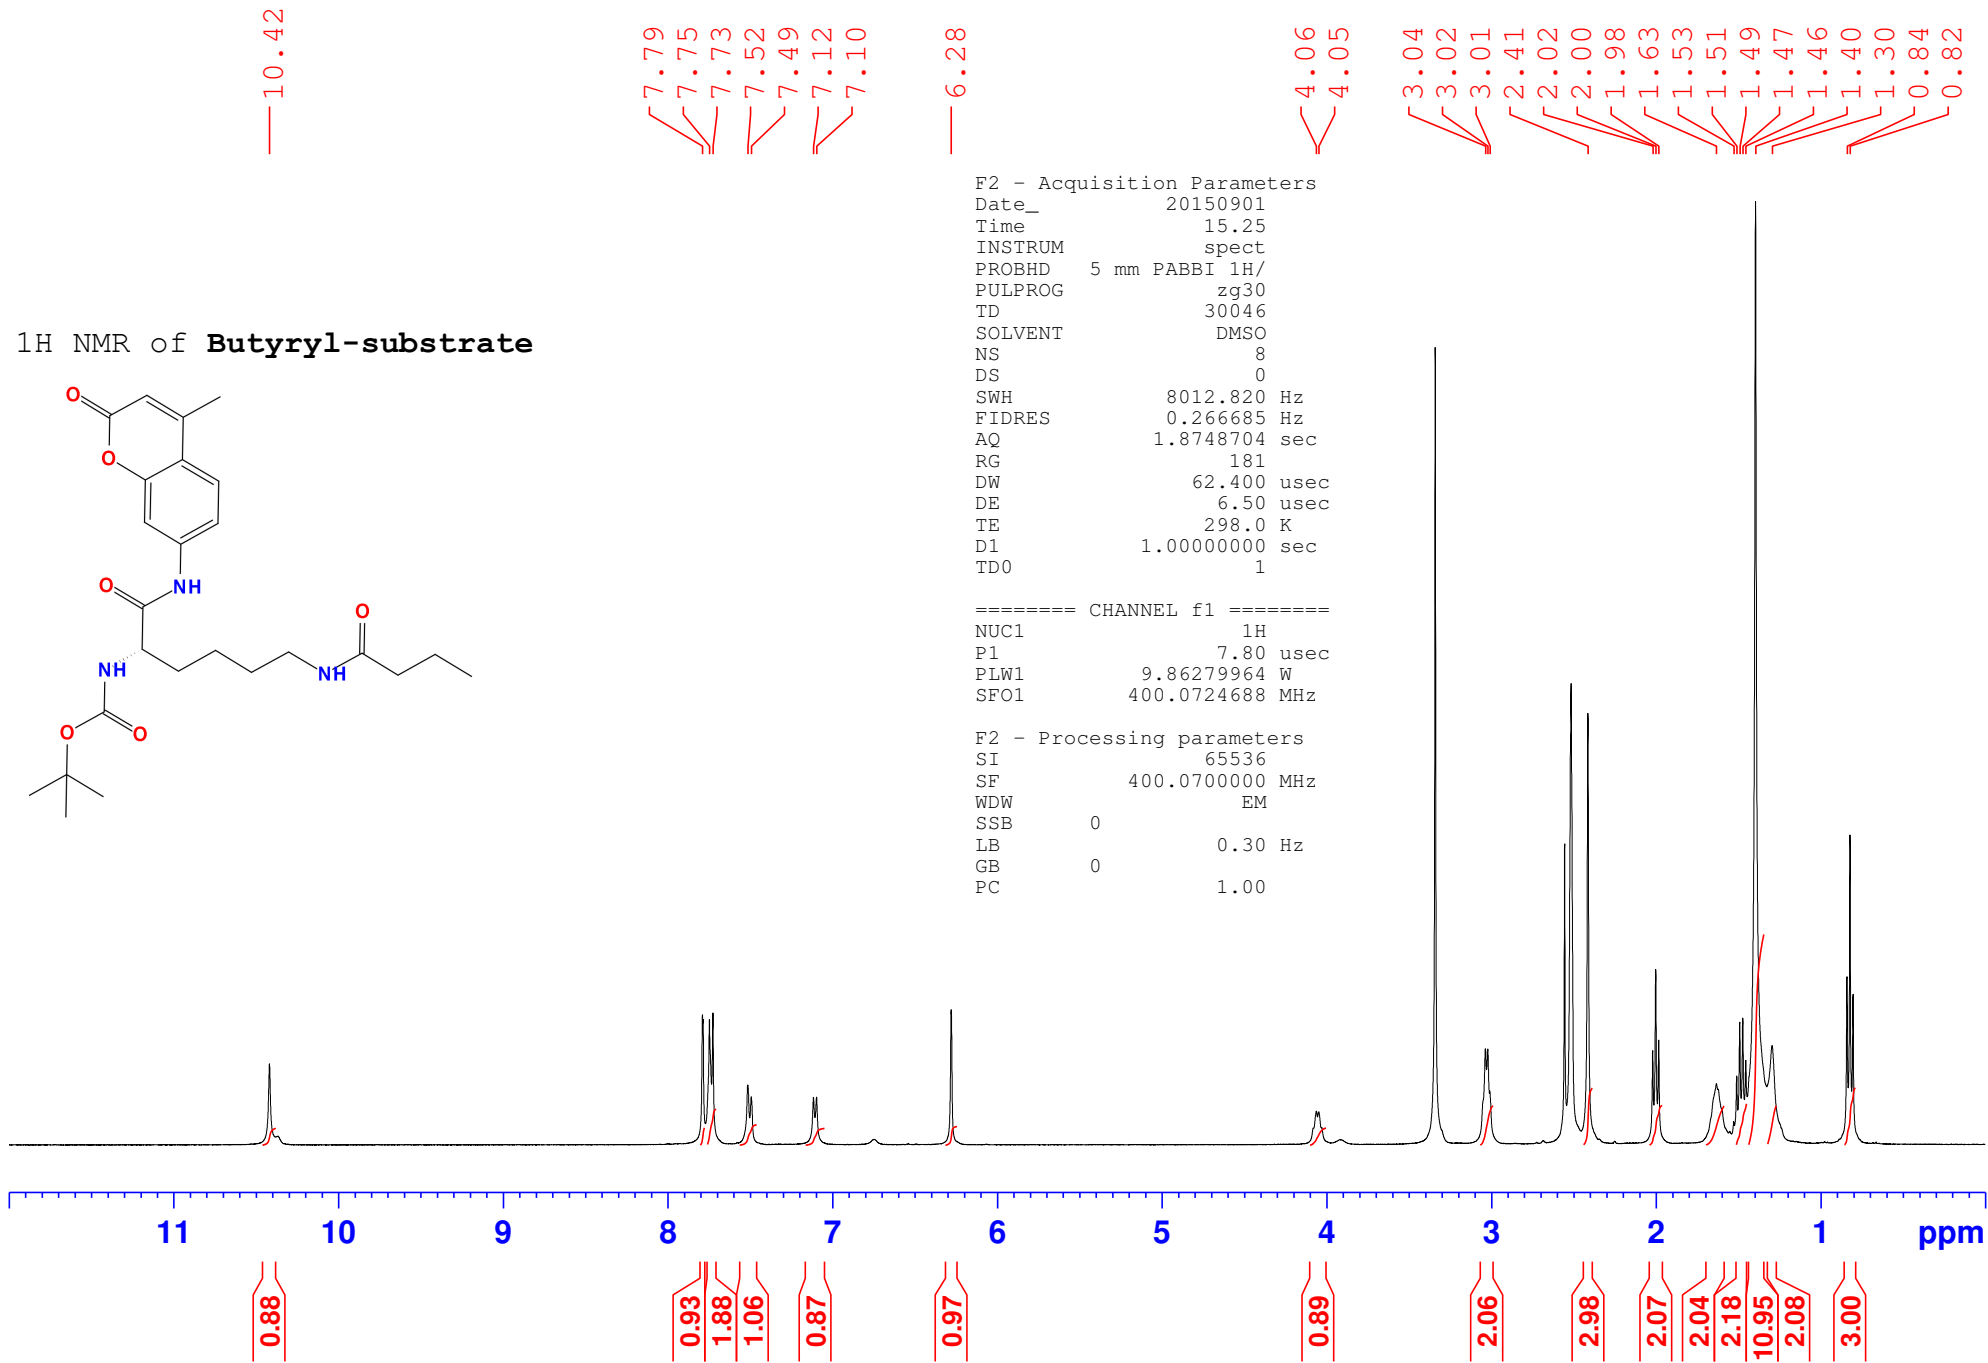

F2 - Acquisition Parameters  
 Date\_ 20150901  
 Time 15.25  
 INSTRUM spect  
 PROBHD 5 mm PABBI 1H/  
 PULPROG zg30  
 TD 30046  
 SOLVENT DMSO  
 NS 8  
 DS 0  
 SWH 8012.820 Hz  
 FIDRES 0.266685 Hz  
 AQ 1.8748704 sec  
 RG 181  
 DW 62.400 usec  
 DE 6.50 usec  
 TE 298.0 K  
 D1 1.00000000 sec  
 TD0 1

==== CHANNEL f1 =====  
 NUC1 1H  
 P1 7.80 usec  
 PLW1 9.86279964 W  
 SFO1 400.0724688 MHz

F2 - Processing parameters  
 SI 65536  
 SF 400.0700000 MHz  
 WDW EM  
 SSB 0  
 LB 0.30 Hz  
 GB 0  
 PC 1.00

ppm

## HSQC of Butyryl-substrate

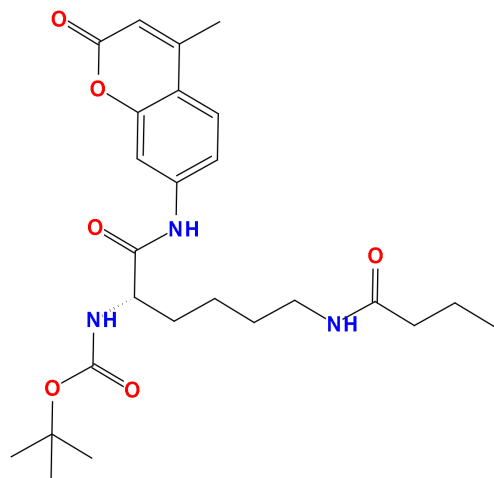

14 13 12 11 10 9 8 7 6 5 4 3 2 1 0 -1 -2 ppm

F2 - Acquisition Parameters  
 Date\_ 20150901  
 Time 15.28  
 INSTRUM spect  
 PROBHD 5 mm PABBI 1H/  
 PULPROG hsqcetgpsi2  
 TD 1024  
 SOLVENT DMSO  
 NS 2  
 DS 0  
 SWH 6602.113 Hz  
 FIDRES 6.447376 Hz  
 AQ 0.0775509 sec  
 RG 2050  
 DW 75.733 usec  
 DE 6.50 usec  
 TE 298.0 K  
 CNST2 145.0000000  
 D0 0.00000300 sec  
 D1 1.50000000 sec  
 D4 0.00172414 sec  
 D11 0.03000000 sec  
 D16 0.00020000 sec  
 D24 0.00086207 sec  
 IN0 0.00003000 sec  
 ZGPTNS

===== CHANNEL f1 =====  
 NUC1 1H  
 P1 7.80 usec  
 P2 15.60 usec  
 P28 1000.00 usec  
 PLW1 9.86279964 W  
 SFO1 400.0724053 MHz

===== CHANNEL f2 =====  
 CPDPRG[2] garp  
 NUC2 13C  
 P3 13.00 usec  
 P4 26.00 usec  
 PCPD2 80.00 usec  
 PLW2 102.08999634 W  
 PLW12 2.69589996 W  
 SFO2 100.6052242 MHz

===== GRADIENT CHANNEL =====  
 GPNAM[1] SMSQ10.100  
 GPNAM[2] SMSQ10.100  
 GPNAM[3] SMSQ10.100  
 GPNAM[4] SMSQ10.100  
 GPZ1 80.00 %  
 GPZ2 20.10 %  
 GPZ3 11.00 %  
 GPZ4 -5.00 %  
 P16 1000.00 usec  
 P19 600.00 usec

F1 - Acquisition parameters  
 TD 256  
 SFO1 100.6052 MHz  
 FIDRES 130.197311 Hz  
 SW 165.650 ppm  
 FhMODE Echo-Antiecho

F2 - Processing parameters  
 SI 1024  
 SF 400.0700000 MHz  
 WDW QSINE  
 SSB 2  
 LB 0 Hz  
 GB 0  
 PC 1.00

F1 - Processing parameters  
 SI 1024  
 MC2 echo-antiecho  
 SF 100.5976820 MHz  
 WDW QSINE  
 SSB 2  
 LB 0 Hz  
 GB 0

1H NMR of Crotonyl-substrate

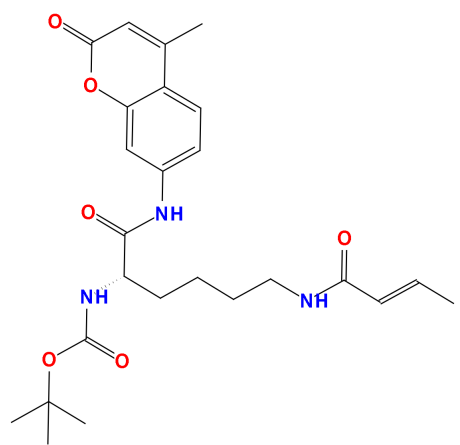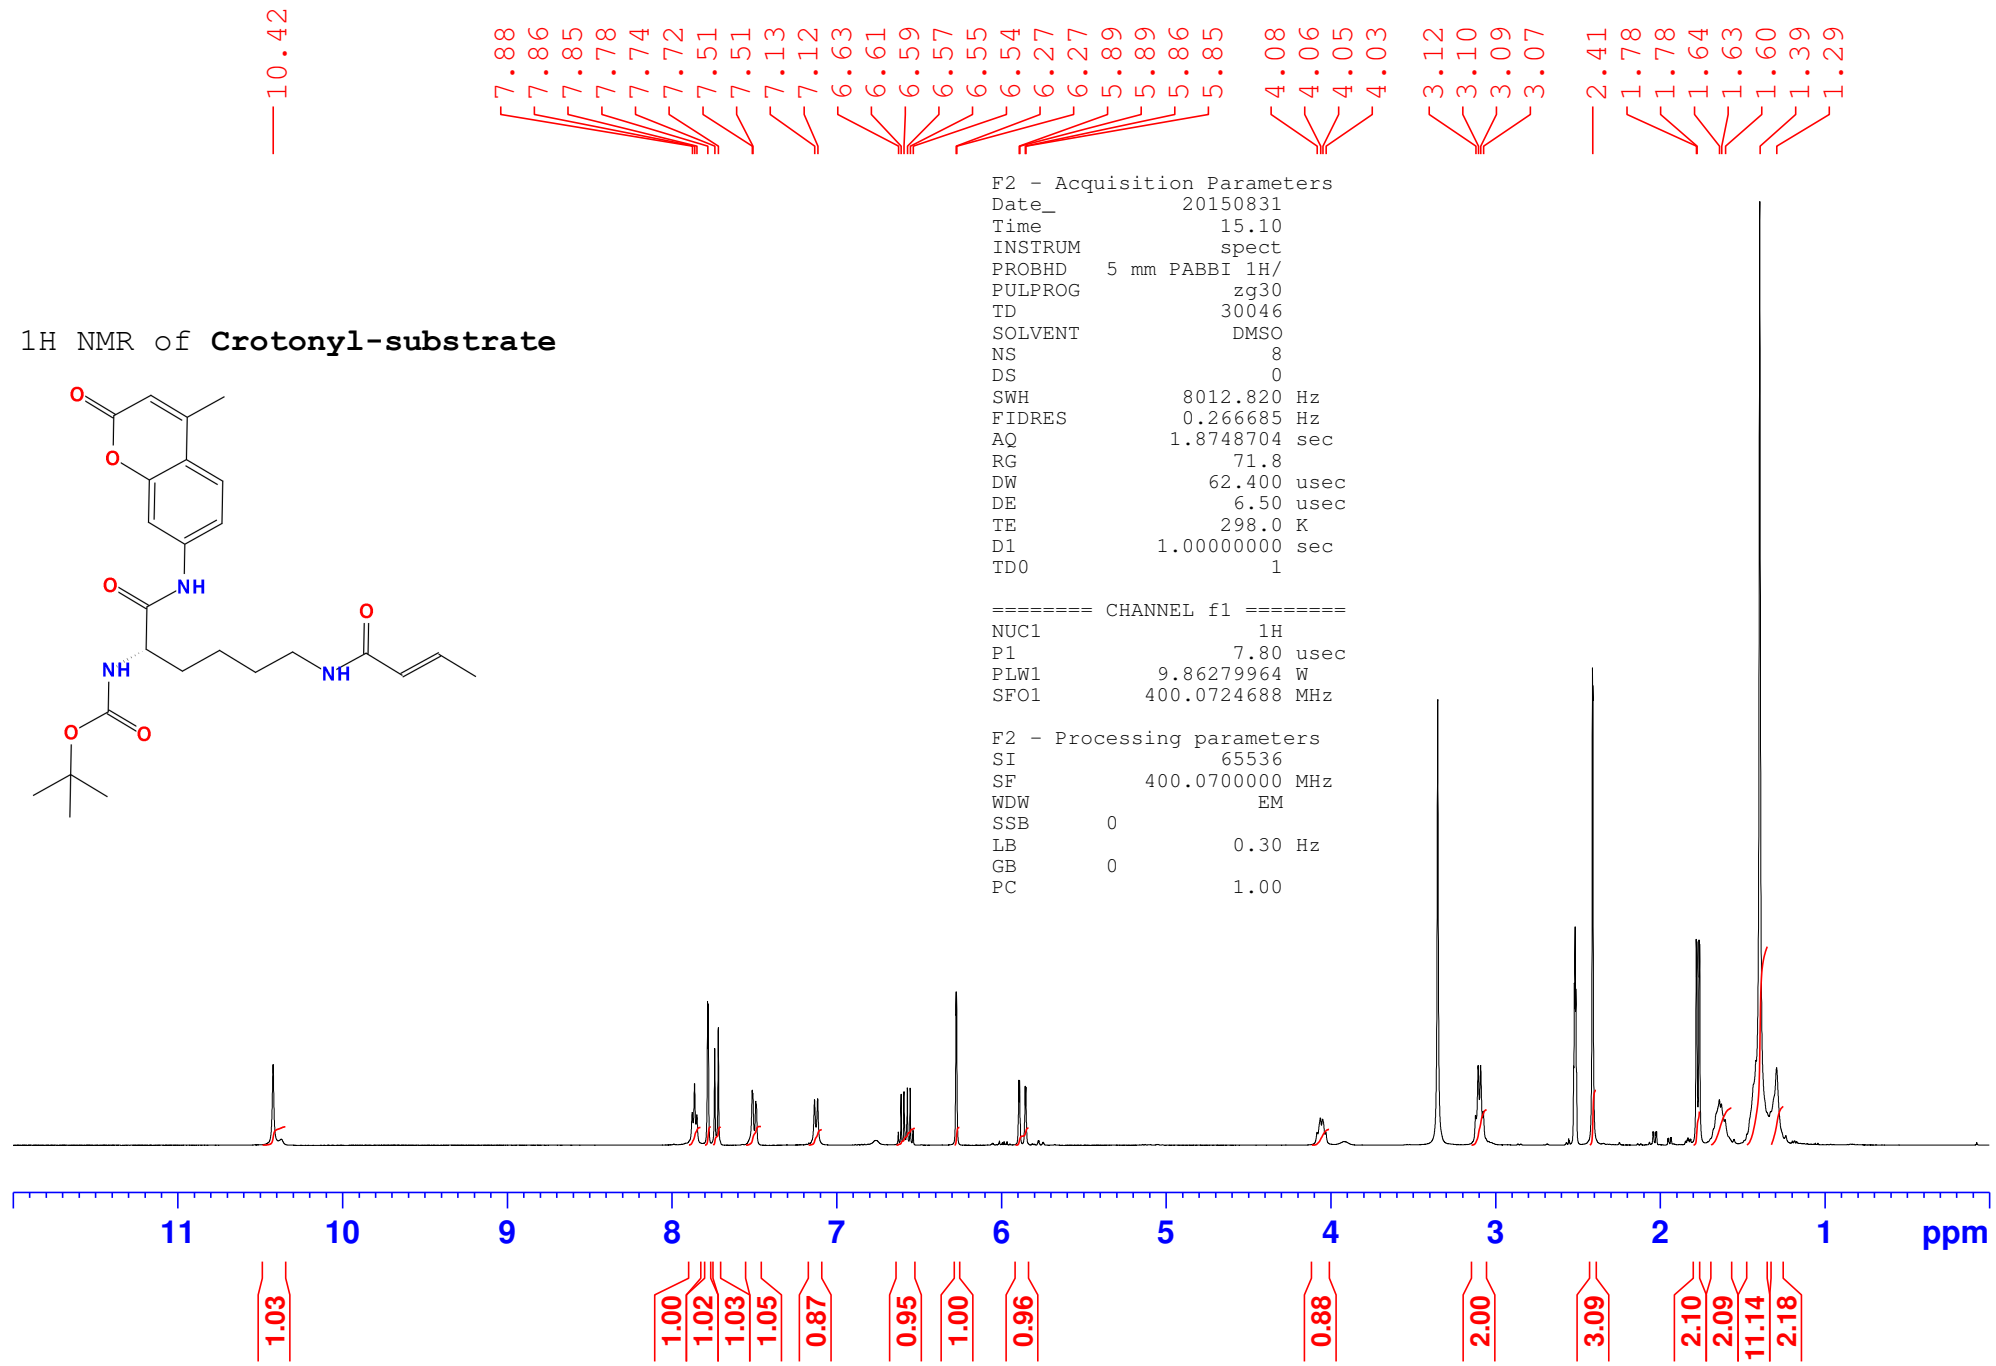

```

F2 - Acquisition Parameters
Date_      20150831
Time       15.10
INSTRUM    spect
PROBHD     5 mm PABBI 1H/
PULPROG    zg30
TD         30046
SOLVENT    DMSO
NS         8
DS         0
SWH        8012.820 Hz
FIDRES     0.266685 Hz
AQ         1.8748704 sec
RG         71.8
DW         62.400 usec
DE         6.50 usec
TE         298.0 K
D1         1.00000000 sec
D10        1
    
```

```

===== CHANNEL f1 =====
NUC1       1H
P1         7.80 usec
PLW1       9.86279964 W
SFO1       400.0724688 MHz
    
```

```

F2 - Processing parameters
SI         65536
SF         400.0700000 MHz
WDW        EM
SSB        0
LB         0.30 Hz
GB         0
PC         1.00
    
```

ppm

## HSQC of Crotonyl-substrate

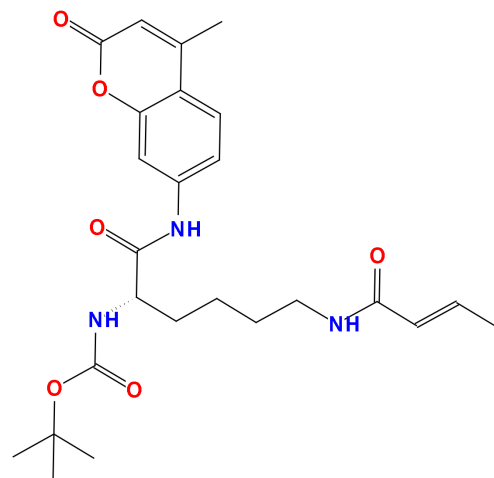

```

F2 - Acquisition Parameters
Date_      20150831
Time       16.50
INSTRUM    spect
PROBHD     5 mm FABBI 1H/
PULPROG    hsqcetgpsi2
TD         1024
SOLVENT    DMSO
NS         2
DS         0
SWH        5330.490 Hz
FIDRES     5.205557 Hz
AQ         0.0960512 sec
RG         2050
DW         93.800 usec
DE         6.50 usec
TE         298.0 K
CNST2      145.0000000
D0         0.00000300 sec
D1         1.50000000 sec
D4         0.00172414 sec
D11        0.03000000 sec
D16        0.00020000 sec
D24        0.00086207 sec
INO        0.00003000 sec
ZGOPTNS

```

```

===== CHANNEL f1 =====
NUC1       1H
P1         7.80 usec
P2         15.60 usec
P28        1000.00 usec
PLW1       9.86279964 W
SFO1       400.0724053 MHz

```

```

===== CHANNEL f2 =====
CPDPRG[2]  garp
NUC2       13C
P3         13.00 usec
P4         26.00 usec
PCPD2      80.00 usec
PLW2       102.08999634 W
PLW12      2.69589996 W
SFO2       100.6052242 MHz

```

```

===== GRADIENT CHANNEL =====
GPNAM[1]   SMSQ10.100
GPNAM[2]   SMSQ10.100
GPNAM[3]   SMSQ10.100
GPNAM[4]   SMSQ10.100
GPZ1       80.00 %
GPZ2       20.10 %
GPZ3       11.00 %
GPZ4       -5.00 %
P16        1000.00 usec
P19        600.00 usec

```

```

F1 - Acquisition parameters
TD         256
SFO1       100.6052 MHz
FIDRES     130.197311 Hz
SW         165.650 ppm
F1MODE     Echo-Antiecho

```

```

F2 - Processing parameters
SI         1024
SF         400.0700000 MHz
WDW        QSINE
SSB        2
LB         0 Hz
GB         0
PC         1.00

```

```

F1 - Processing parameters
SI         1024
MC2        echo-antiecho
SF         100.5976820 MHz
WDW        QSINE
SSB        2
LB         0 Hz
GB         0

```

12

11

10

9

8

7

6

5

4

3

2

1

0

ppm

**<sup>1</sup>H NMR of Valeryl-substrate**

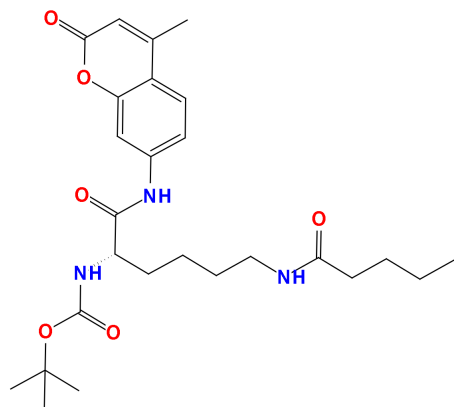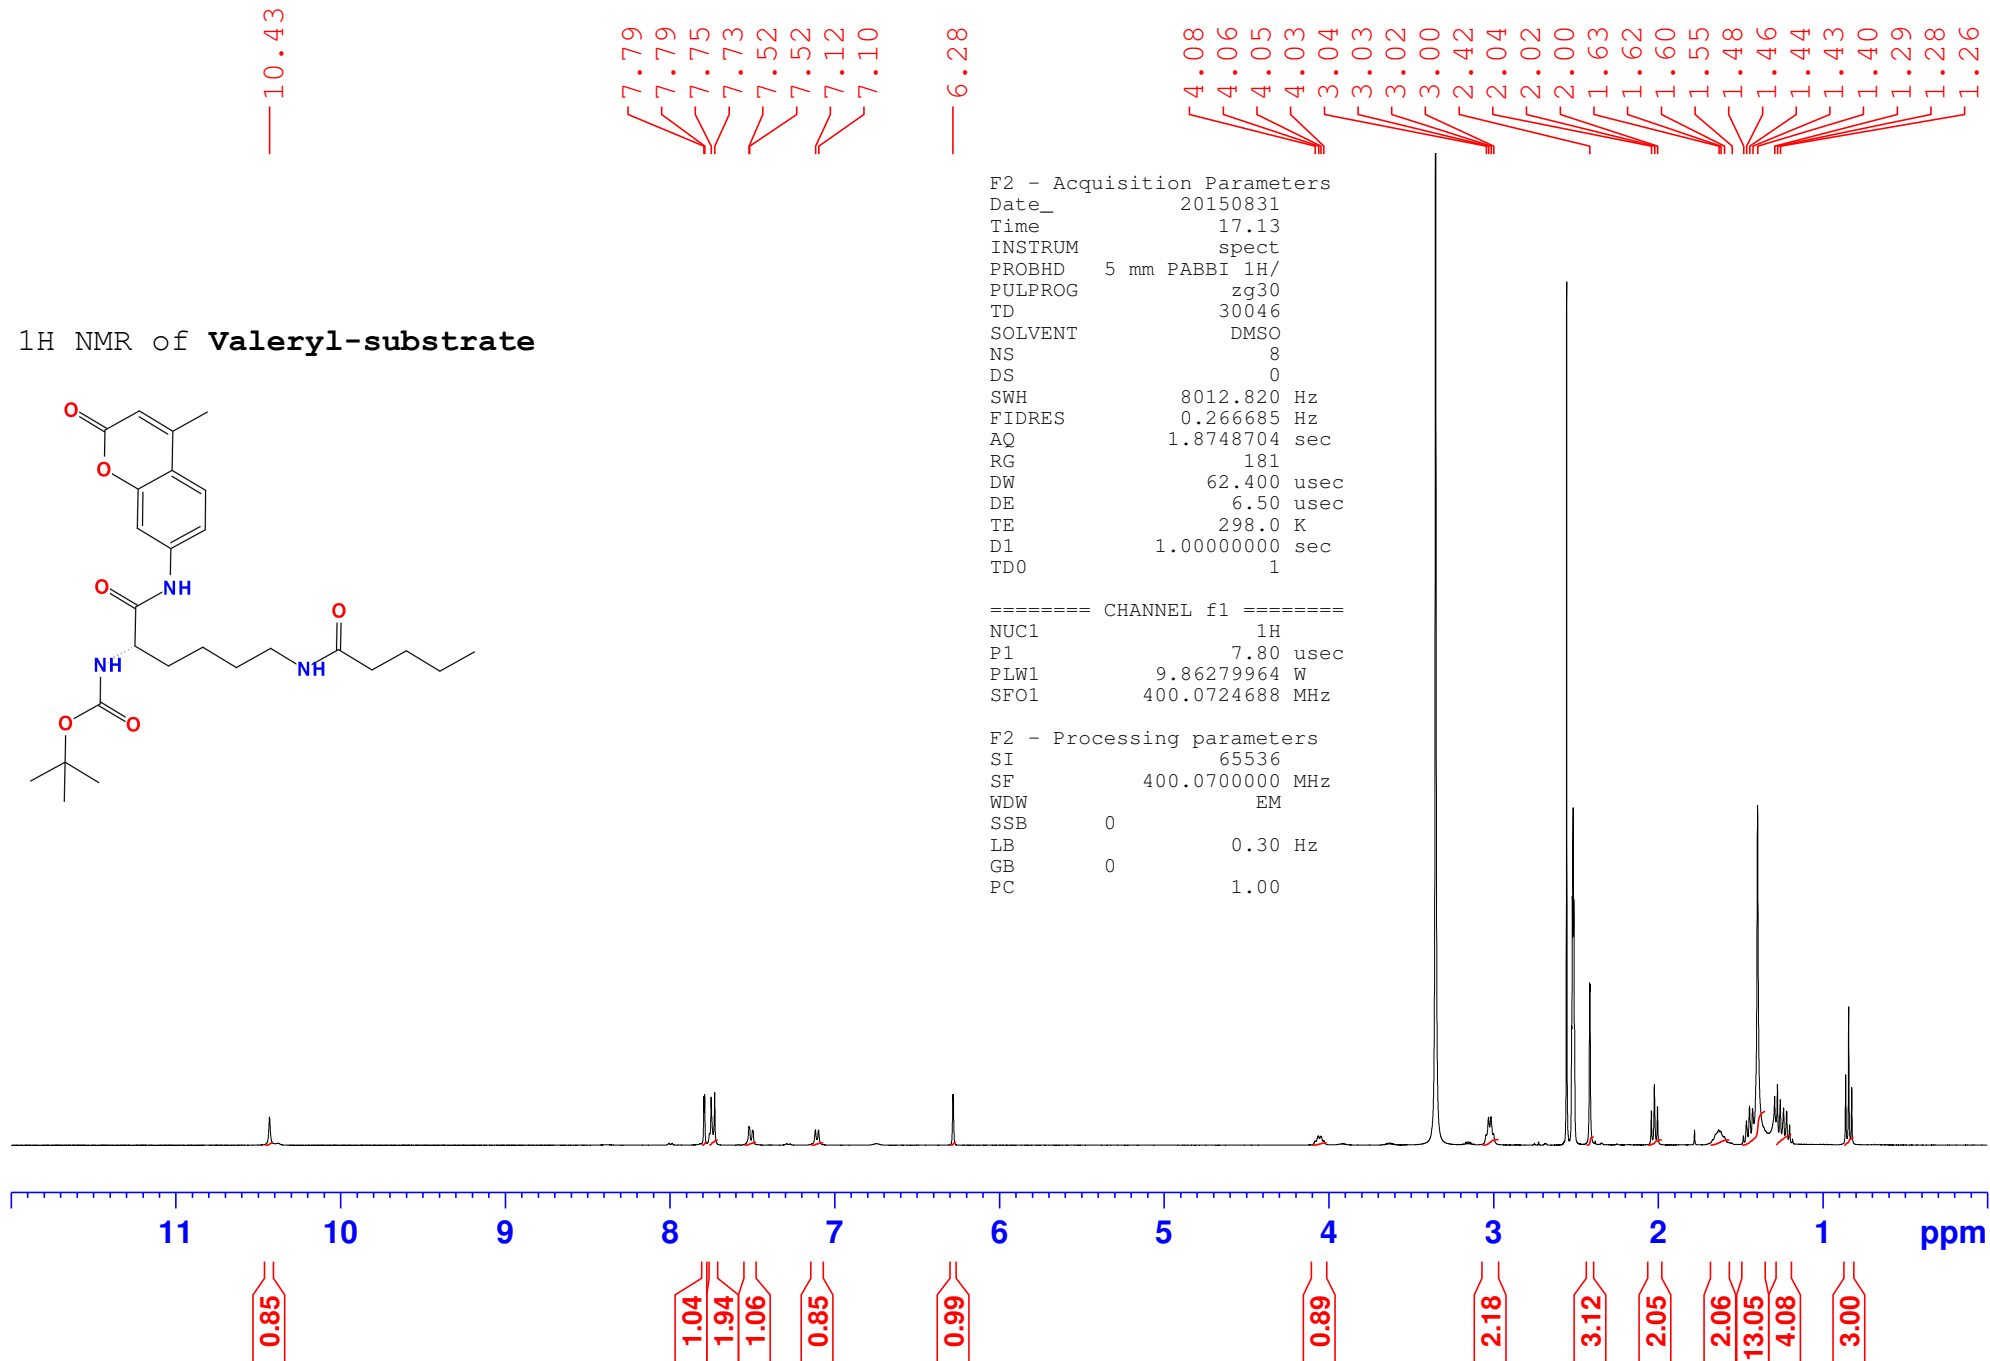

```

F2 - Acquisition Parameters
Date_      20150831
Time       17.13
INSTRUM    spect
PROBHD     5 mm PABBI 1H/
PULPROG    zg30
TD         30046
SOLVENT     DMSO
NS          8
DS          0
SWH         8012.820 Hz
FIDRES      0.266685 Hz
AQ          1.8748704 sec
RG          181
DW          62.400 usec
DE          6.50 usec
TE          298.0 K
D1          1.00000000 sec
TD0         1
    
```

```

===== CHANNEL f1 =====
NUC1        1H
P1          7.80 usec
PLW1        9.86279964 W
SFO1        400.0724688 MHz
    
```

```

F2 - Processing parameters
SI          65536
SF          400.0700000 MHz
WDW         EM
SSB         0
LB          0.30 Hz
GB          0
PC          1.00
    
```

ppm

## HSQC of Valeryl-substrate

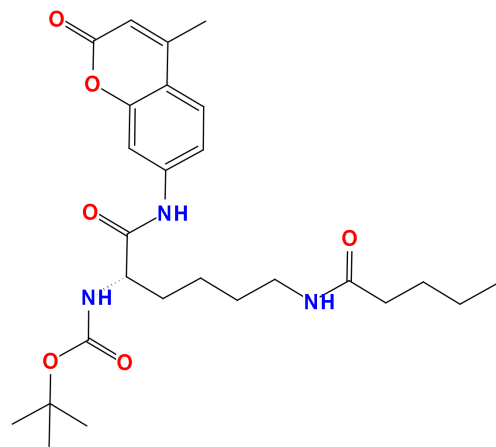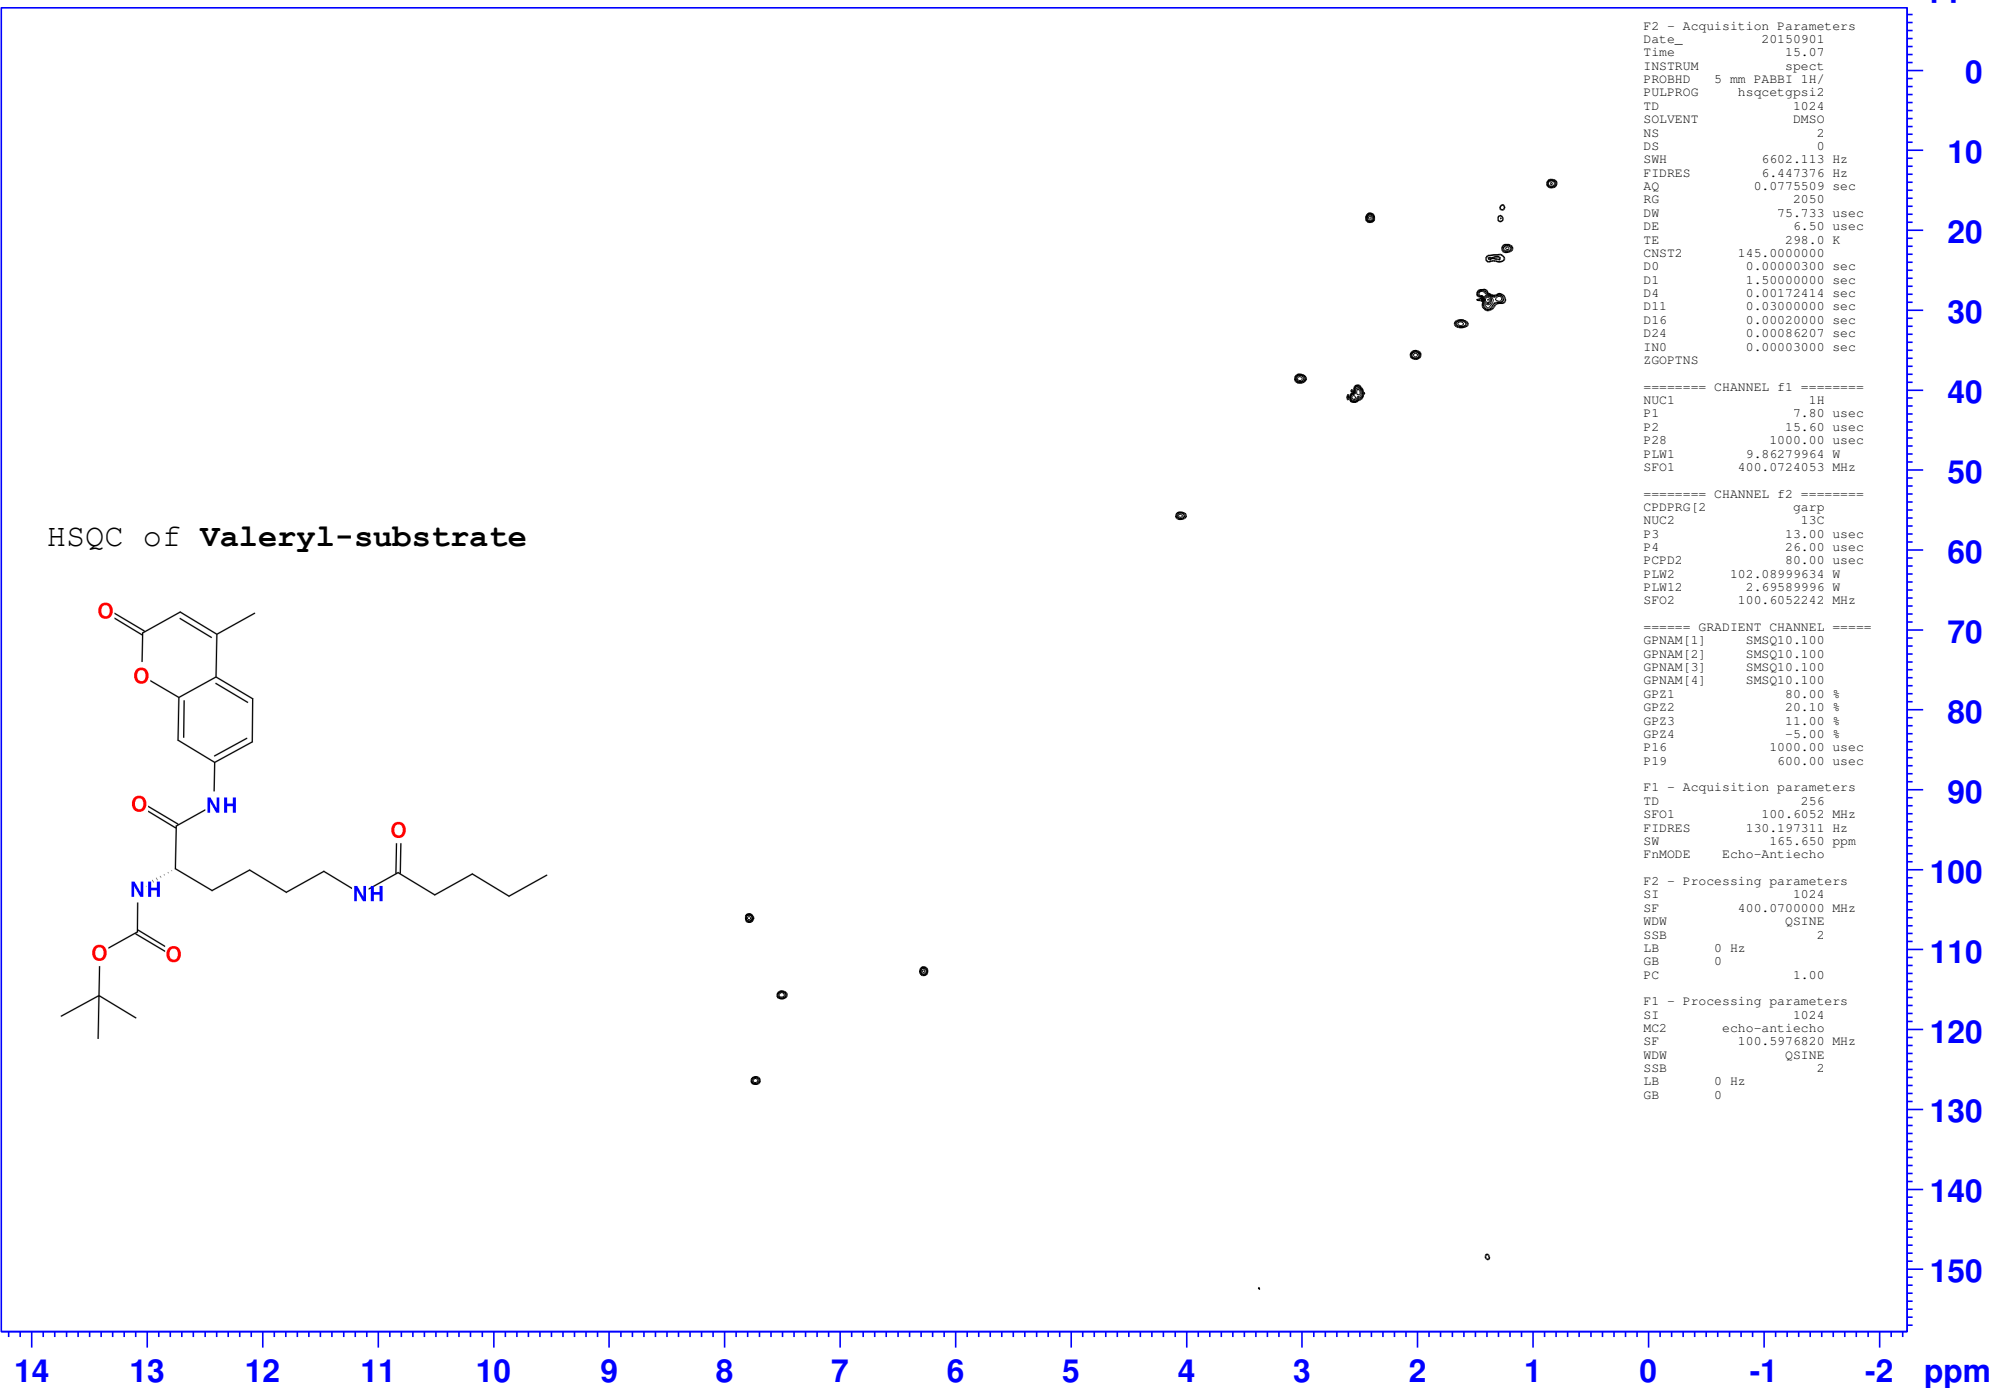

F2 - Acquisition Parameters  
 Date\_ 20150901  
 Time 15.07  
 INSTRUM spect  
 PROBHD 5 mm PABBI 1H/  
 PULPROG hsqcetgpsi2  
 TD 1024  
 SOLVENT DMSO  
 NS 2  
 DS 0  
 SWH 6602.113 Hz  
 FIDRES 6.447376 Hz  
 AQ 0.0775509 sec  
 RG 2050  
 DW 75.733 usec  
 DE 6.50 usec  
 TE 298.0 K  
 CNST2 145.0000000  
 D0 0.00000300 sec  
 D1 1.50000000 sec  
 D4 0.00172414 sec  
 D11 0.03000000 sec  
 D16 0.00020000 sec  
 D24 0.00086207 sec  
 INO 0.00003000 sec  
 ZGOPTNS

===== CHANNEL f1 =====  
 NUC1 1H  
 P1 7.80 usec  
 P2 15.60 usec  
 P28 1000.00 usec  
 PLW1 9.86279964 W  
 SFO1 400.0724053 MHz

===== CHANNEL f2 =====  
 CPDPRG[2] garp  
 NUC2 13C  
 P3 13.00 usec  
 P4 26.00 usec  
 PCPD2 80.00 usec  
 PLW2 102.08999634 W  
 PLW12 2.69589996 W  
 SFO2 100.6052242 MHz

===== GRADIENT CHANNEL =====  
 GPNAM[1] SMSQ10.100  
 GPNAM[2] SMSQ10.100  
 GPNAM[3] SMSQ10.100  
 GPNAM[4] SMSQ10.100  
 GPZ1 80.00 %  
 GPZ2 20.10 %  
 GPZ3 11.00 %  
 GPZ4 -5.00 %  
 P16 1000.00 usec  
 P19 600.00 usec

F1 - Acquisition parameters  
 TD 256  
 SFO1 100.6052 MHz  
 FIDRES 130.197311 Hz  
 SW 165.650 ppm  
 FrnMODE Echo-Antiecho

F2 - Processing parameters  
 SI 1024  
 SF 400.0700000 MHz  
 WDW QSINE  
 SSB 2  
 LB 0 Hz  
 GB 0  
 PC 1.00

F1 - Processing parameters  
 SI 1024  
 MC2 echo-antiecho  
 SF 100.5976820 MHz  
 WDW QSINE  
 SSB 2  
 LB 0 Hz  
 GB 0



1H NMR of Hexanoyl-substrate

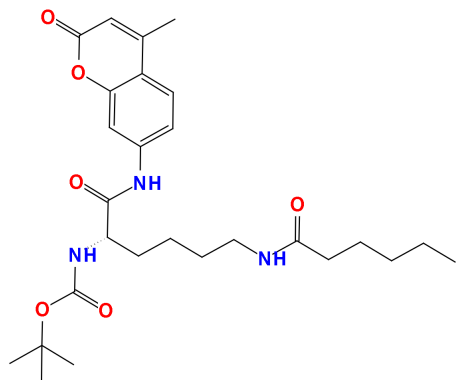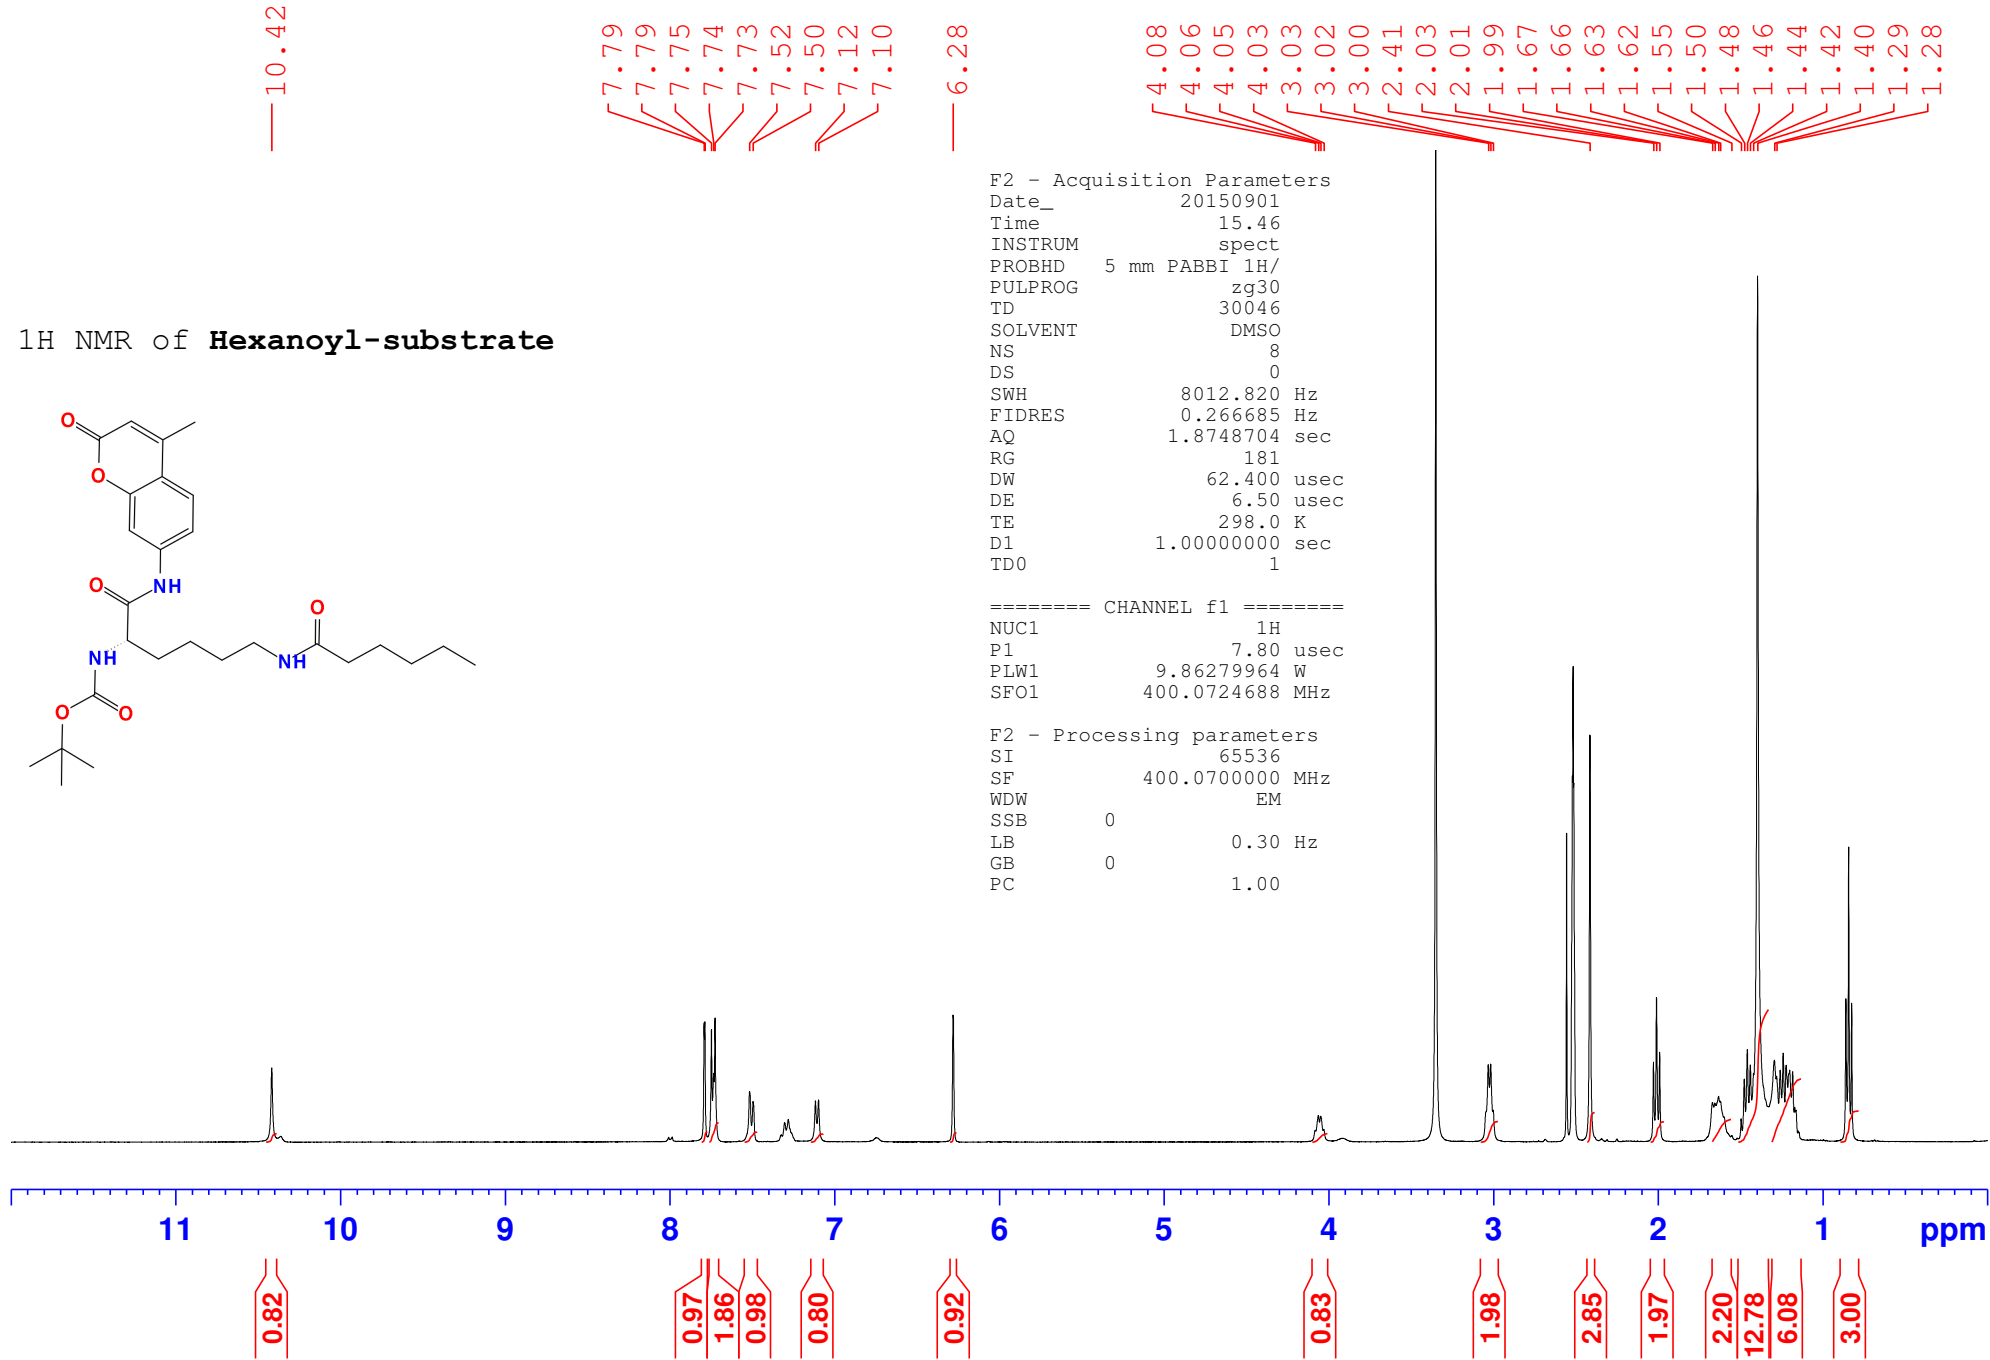

ppm

## HSQC of Hexanoyl-substrate

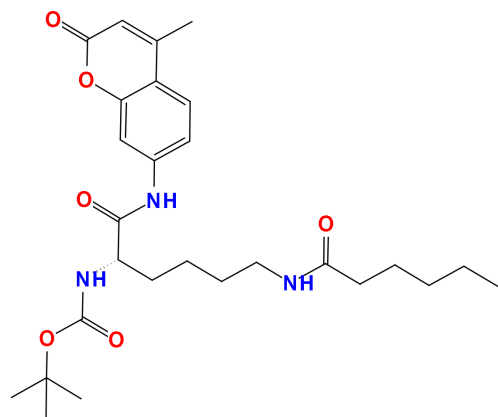

14 13 12 11 10 9 8 7 6 5 4 3 2 1 0 -1 -2 ppm

```

F2 - Acquisition Parameters
Date_      20150901
Time       15.51
INSTRUM    spect
PROBHDD    5 mm PABBI 1H/
PULPROG    hsqcetgpsi2
TD         1024
SOLVENT    DMSO
NS         2
DS         0
SWH        6602.113 Hz
FIDRES     6.447376 Hz
AQ         0.0775509 sec
RG         2050
DW         75.733 usec
DE         6.50 usec
TE         298.0 K
CNST2      145.0000000
D0         0.00000300 sec
D1         1.50000000 sec
D4         0.00172414 sec
D11        0.03000000 sec
D16        0.00020000 sec
D24        0.00086207 sec
INO        0.00003000 sec
ZGOPTNS

```

```

===== CHANNEL f1 =====
NUC1       1H
P1         7.80 usec
P2         15.60 usec
P28        1000.00 usec
PLW1       9.86279964 W
SFO1       400.0724053 MHz

```

```

===== CHANNEL f2 =====
CPDPRG[2]  garp
NUC2       13C
P3         13.00 usec
P4         26.00 usec
PCPD2      80.00 usec
PLW2       102.08999634 W
PLW12      2.69589996 W
SFO2       100.6052242 MHz

```

```

===== GRADIENT CHANNEL =====
GPNAM[1]   SMSQ10.100
GPNAM[2]   SMSQ10.100
GPNAM[3]   SMSQ10.100
GPNAM[4]   SMSQ10.100
GPZ1       80.00 %
GPZ2       20.10 %
GPZ3       11.00 %
GPZ4       -5.00 %
P16        1000.00 usec
P19        600.00 usec

```

```

F1 - Acquisition parameters
TD         256
SFO1       100.6052 MHz
FIDRES     130.197311 Hz
SW         165.650 ppm
FrnMODE    Echo-Antiecho

```

```

F2 - Processing parameters
SI         1024
SF         400.0700000 MHz
WDW        QSINE
SSB        2
LB         0 Hz
GB         0
PC         1.00

```

```

F1 - Processing parameters
SI         1024
MC2        echo-antiecho
SF         100.5976820 MHz
WDW        QSINE
SSB        2
LB         0 Hz
GB         0

```

1H NMR of Heptanoyl-substrate

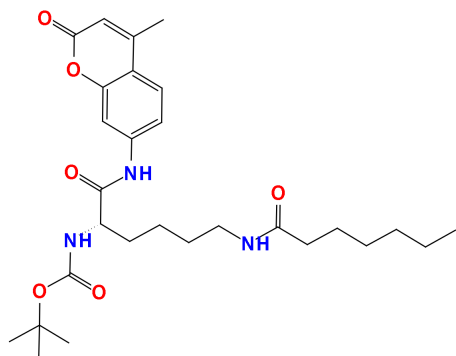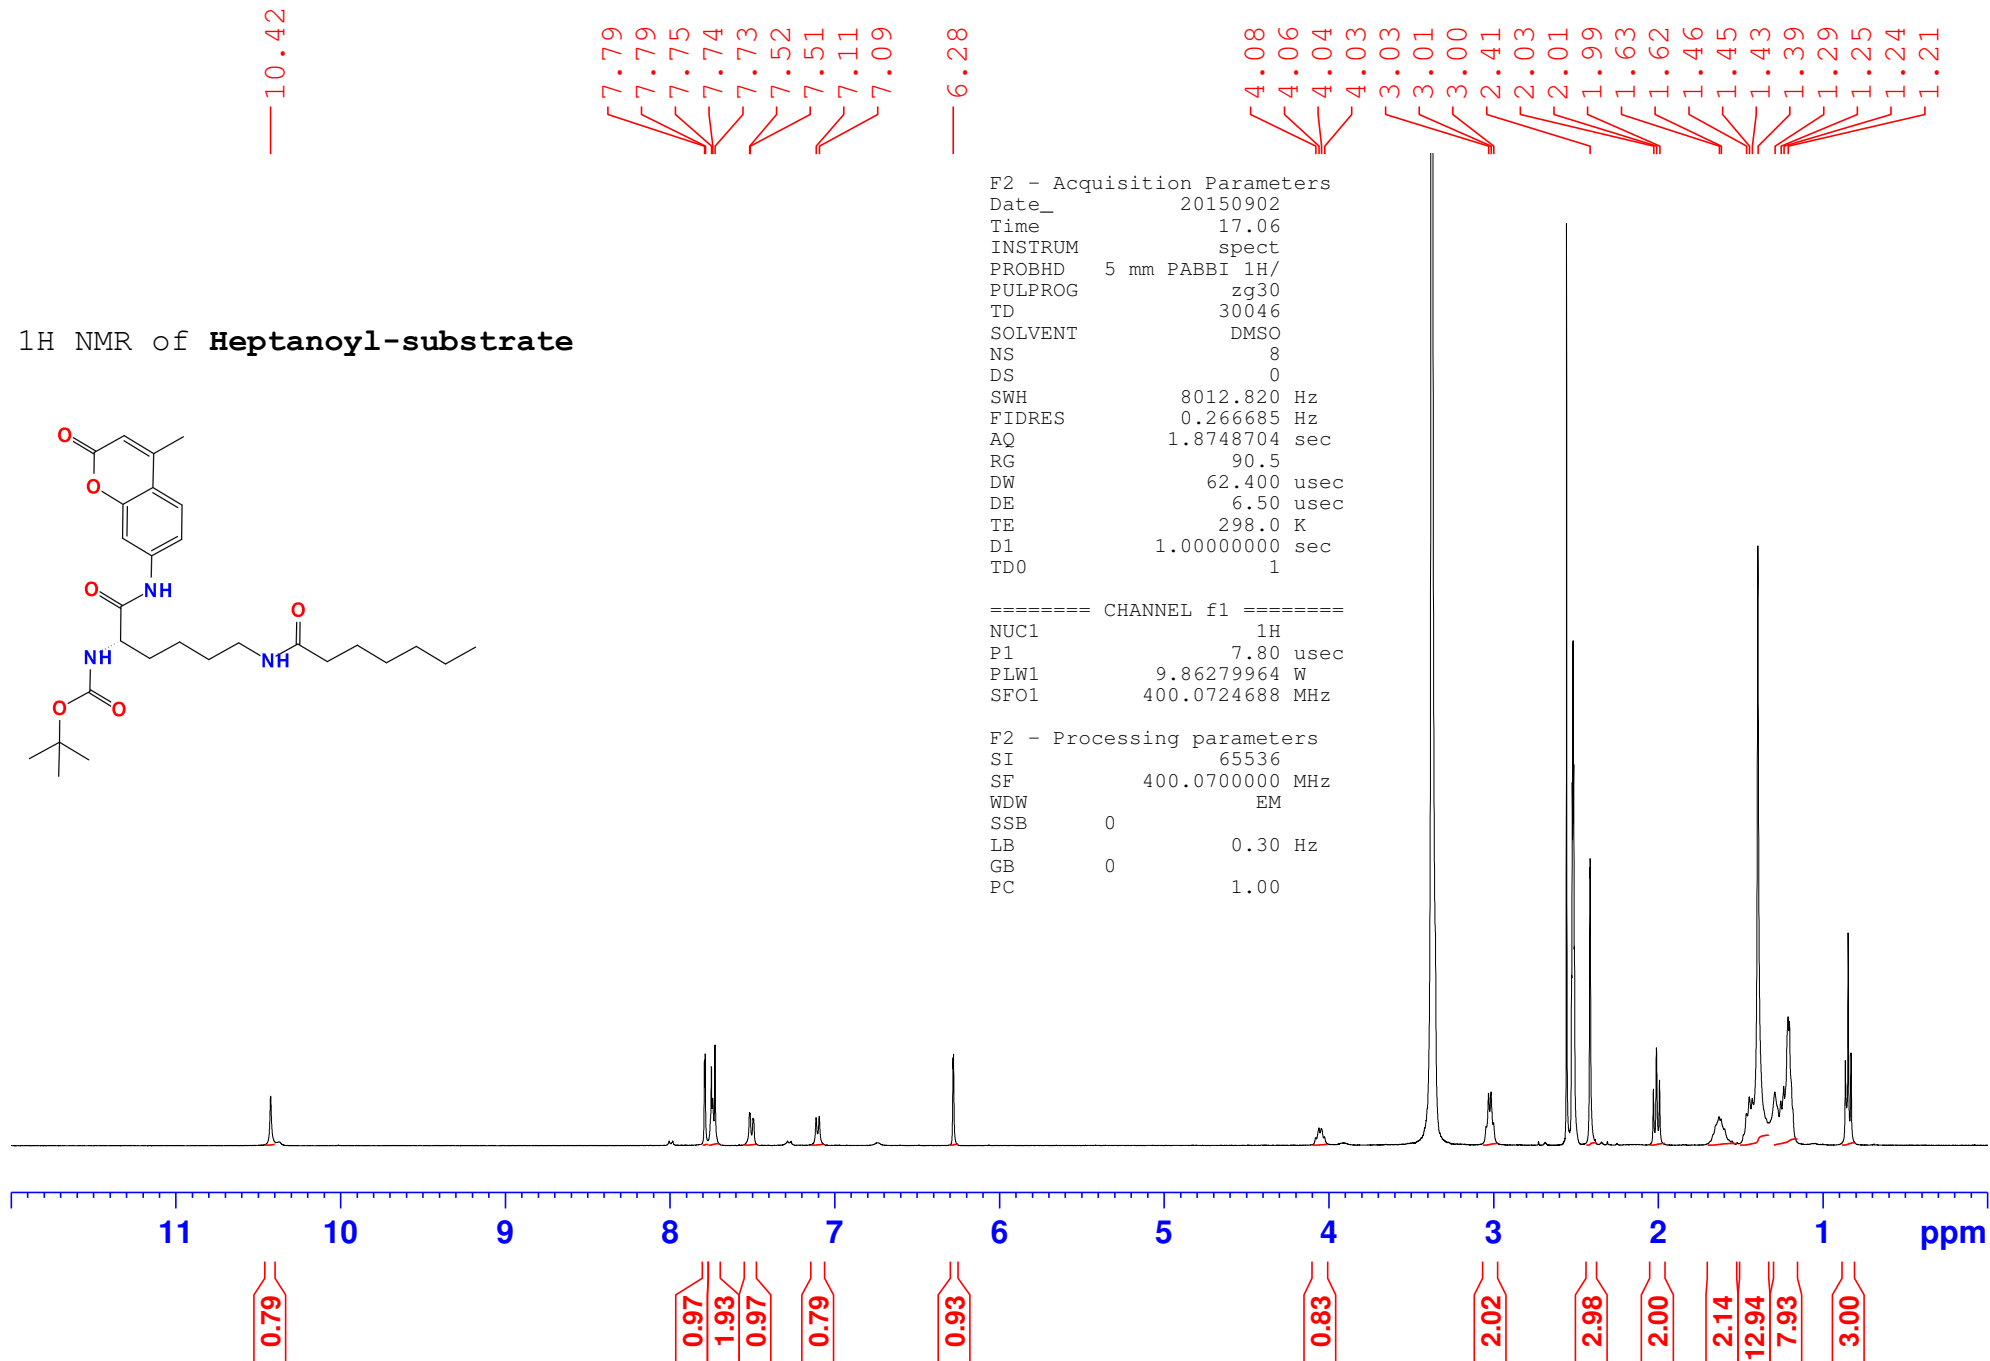

ppm

## HSQC of Heptanoyl-substrate

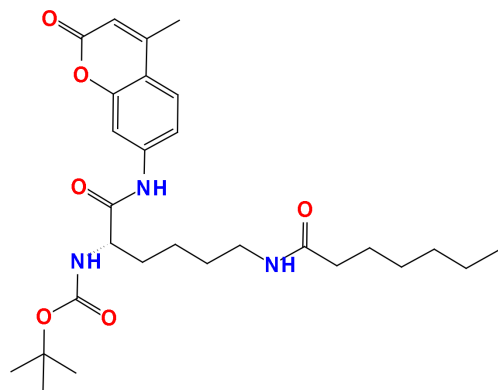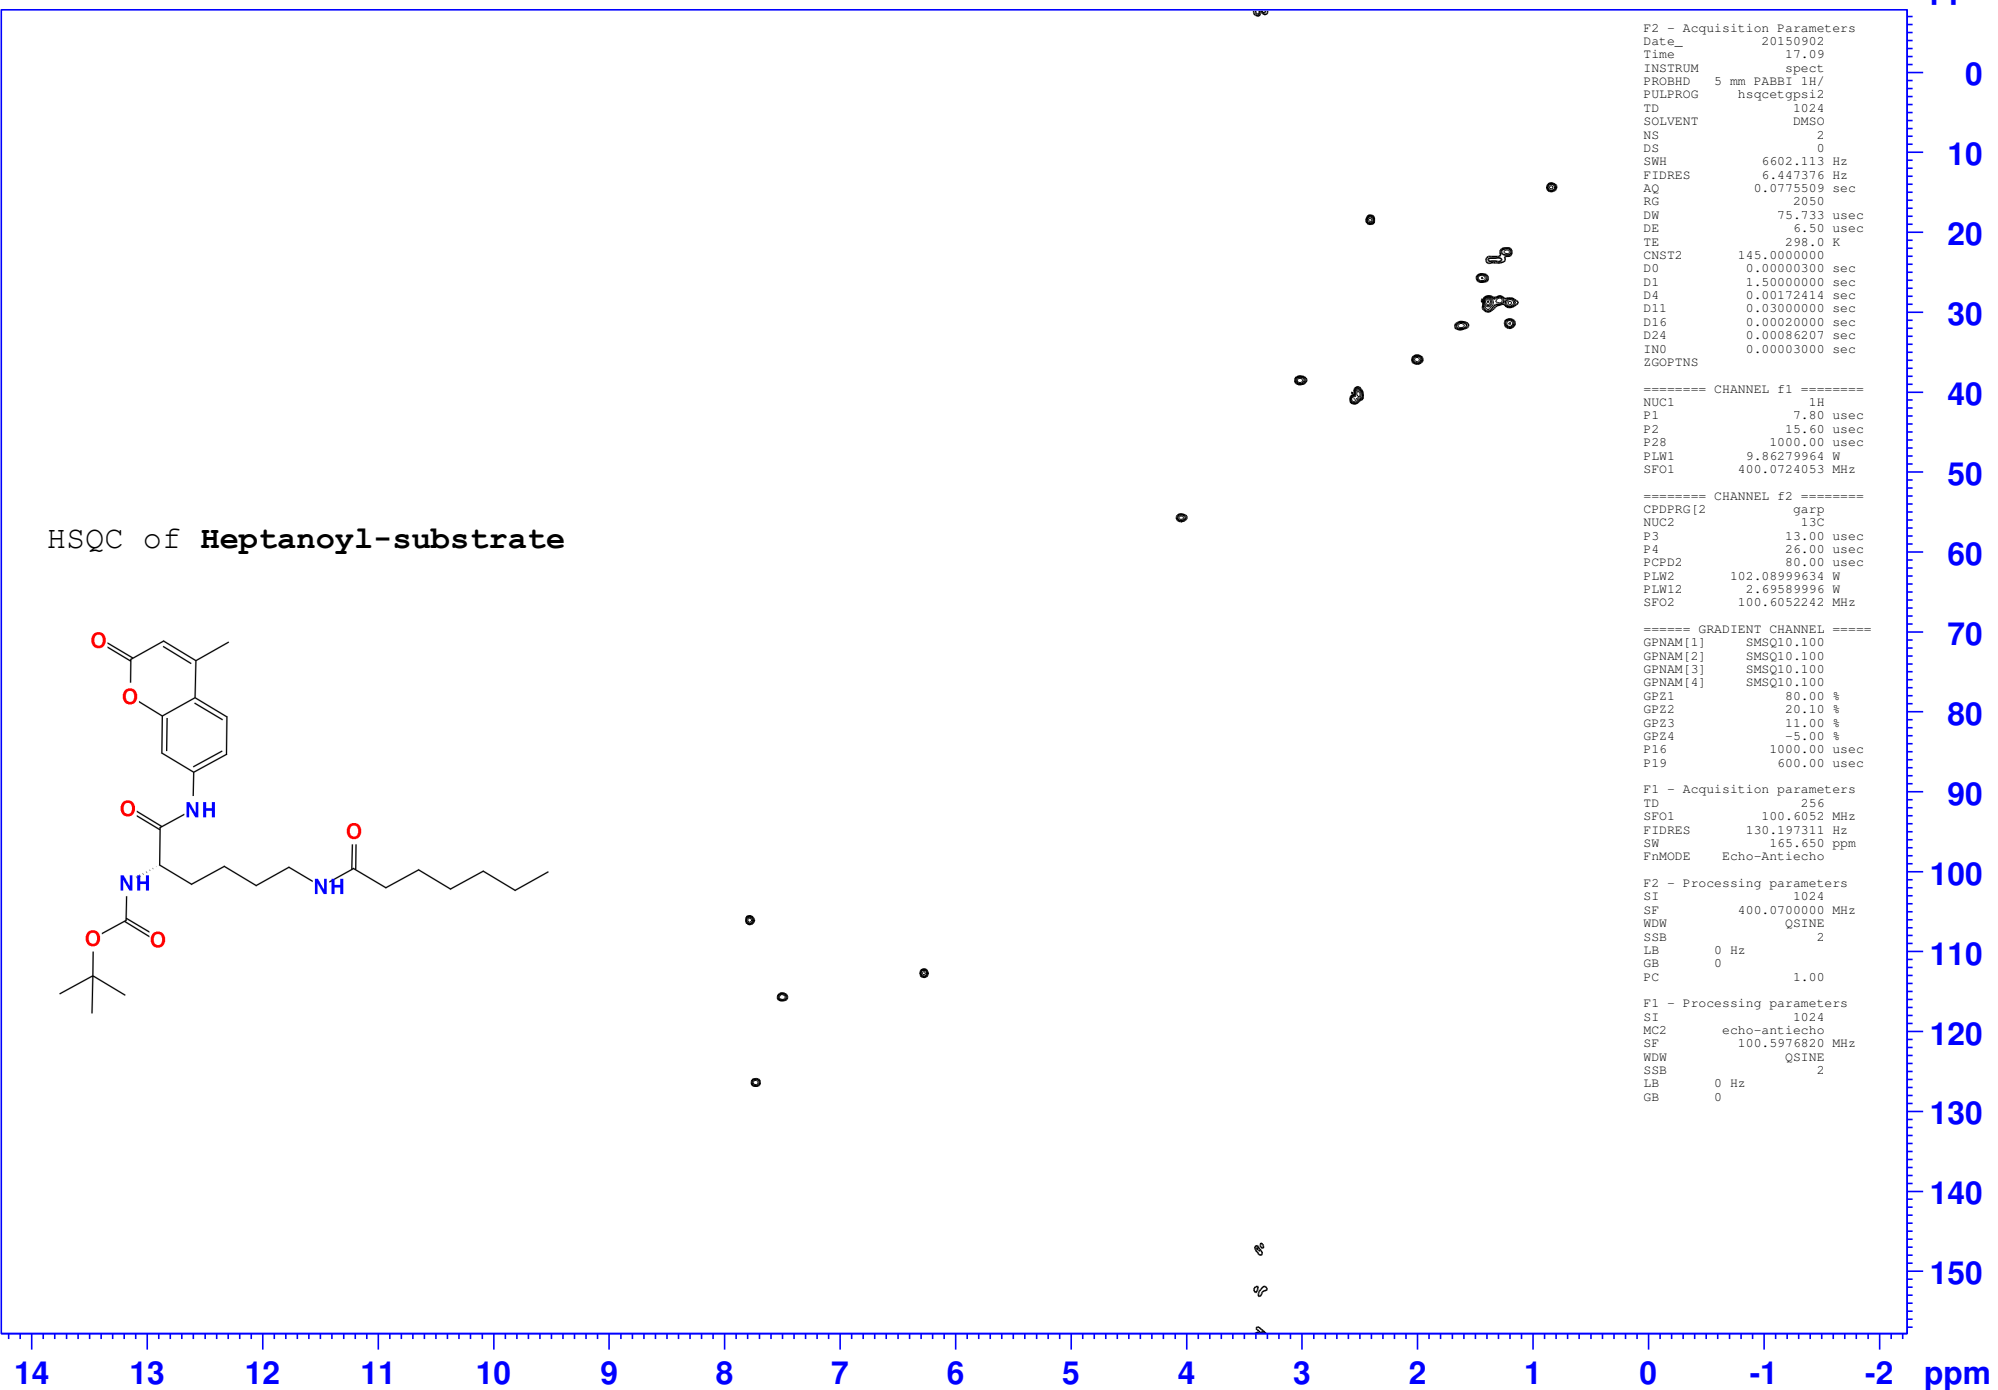

F2 - Acquisition Parameters  
 Date\_ 20150902  
 Time 17.09  
 INSTRUM spect  
 PROBHD 5 mm PABBI 1H/  
 PULPROG hsqcetgpsi2  
 TD 1024  
 SOLVENT DMSO  
 NS 2  
 DS 0  
 SWH 6602.113 Hz  
 FIDRES 6.447376 Hz  
 AQ 0.0775509 sec  
 RG 2050  
 DW 75.733 usec  
 DE 6.50 usec  
 TE 298.0 K  
 CNST2 145.0000000  
 D0 0.00000300 sec  
 D1 1.50000000 sec  
 D4 0.00172414 sec  
 D11 0.03000000 sec  
 D16 0.00020000 sec  
 D24 0.00086207 sec  
 INO 0.00003000 sec  
 ZGOPTNS

===== CHANNEL f1 =====  
 NUC1 1H  
 P1 7.80 usec  
 P2 15.60 usec  
 P28 1000.00 usec  
 PLW1 9.86279964 W  
 SFO1 400.0724053 MHz

===== CHANNEL f2 =====  
 CPDPRG[2] garp  
 NUC2 13C  
 P3 13.00 usec  
 P4 26.00 usec  
 PCPD2 80.00 usec  
 PLW2 102.08999634 W  
 PLW12 2.69589996 W  
 SFO2 100.6052242 MHz

===== GRADIENT CHANNEL =====  
 GPNAM[1] SMSQ10.100  
 GPNAM[2] SMSQ10.100  
 GPNAM[3] SMSQ10.100  
 GPNAM[4] SMSQ10.100  
 GPZ1 80.00 %  
 GPZ2 20.10 %  
 GPZ3 11.00 %  
 GPZ4 -5.00 %  
 P16 1000.00 usec  
 P19 600.00 usec

F1 - Acquisition parameters  
 TD 256  
 SFO1 100.6052 MHz  
 FIDRES 130.197311 Hz  
 SW 165.650 ppm  
 FnmODE Echo-Antiecho

F2 - Processing parameters  
 SI 1024  
 SF 400.0700000 MHz  
 WDW QSINE  
 SSB 2  
 LB 0 Hz  
 GB 0  
 PC 1.00

F1 - Processing parameters  
 SI 1024  
 MC2 echo-antiecho  
 SF 100.5976820 MHz  
 WDW QSINE  
 SSB 2  
 LB 0 Hz  
 GB 0

1H NMR of Octanoyl-substrate

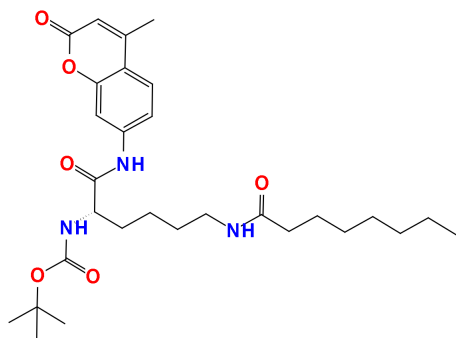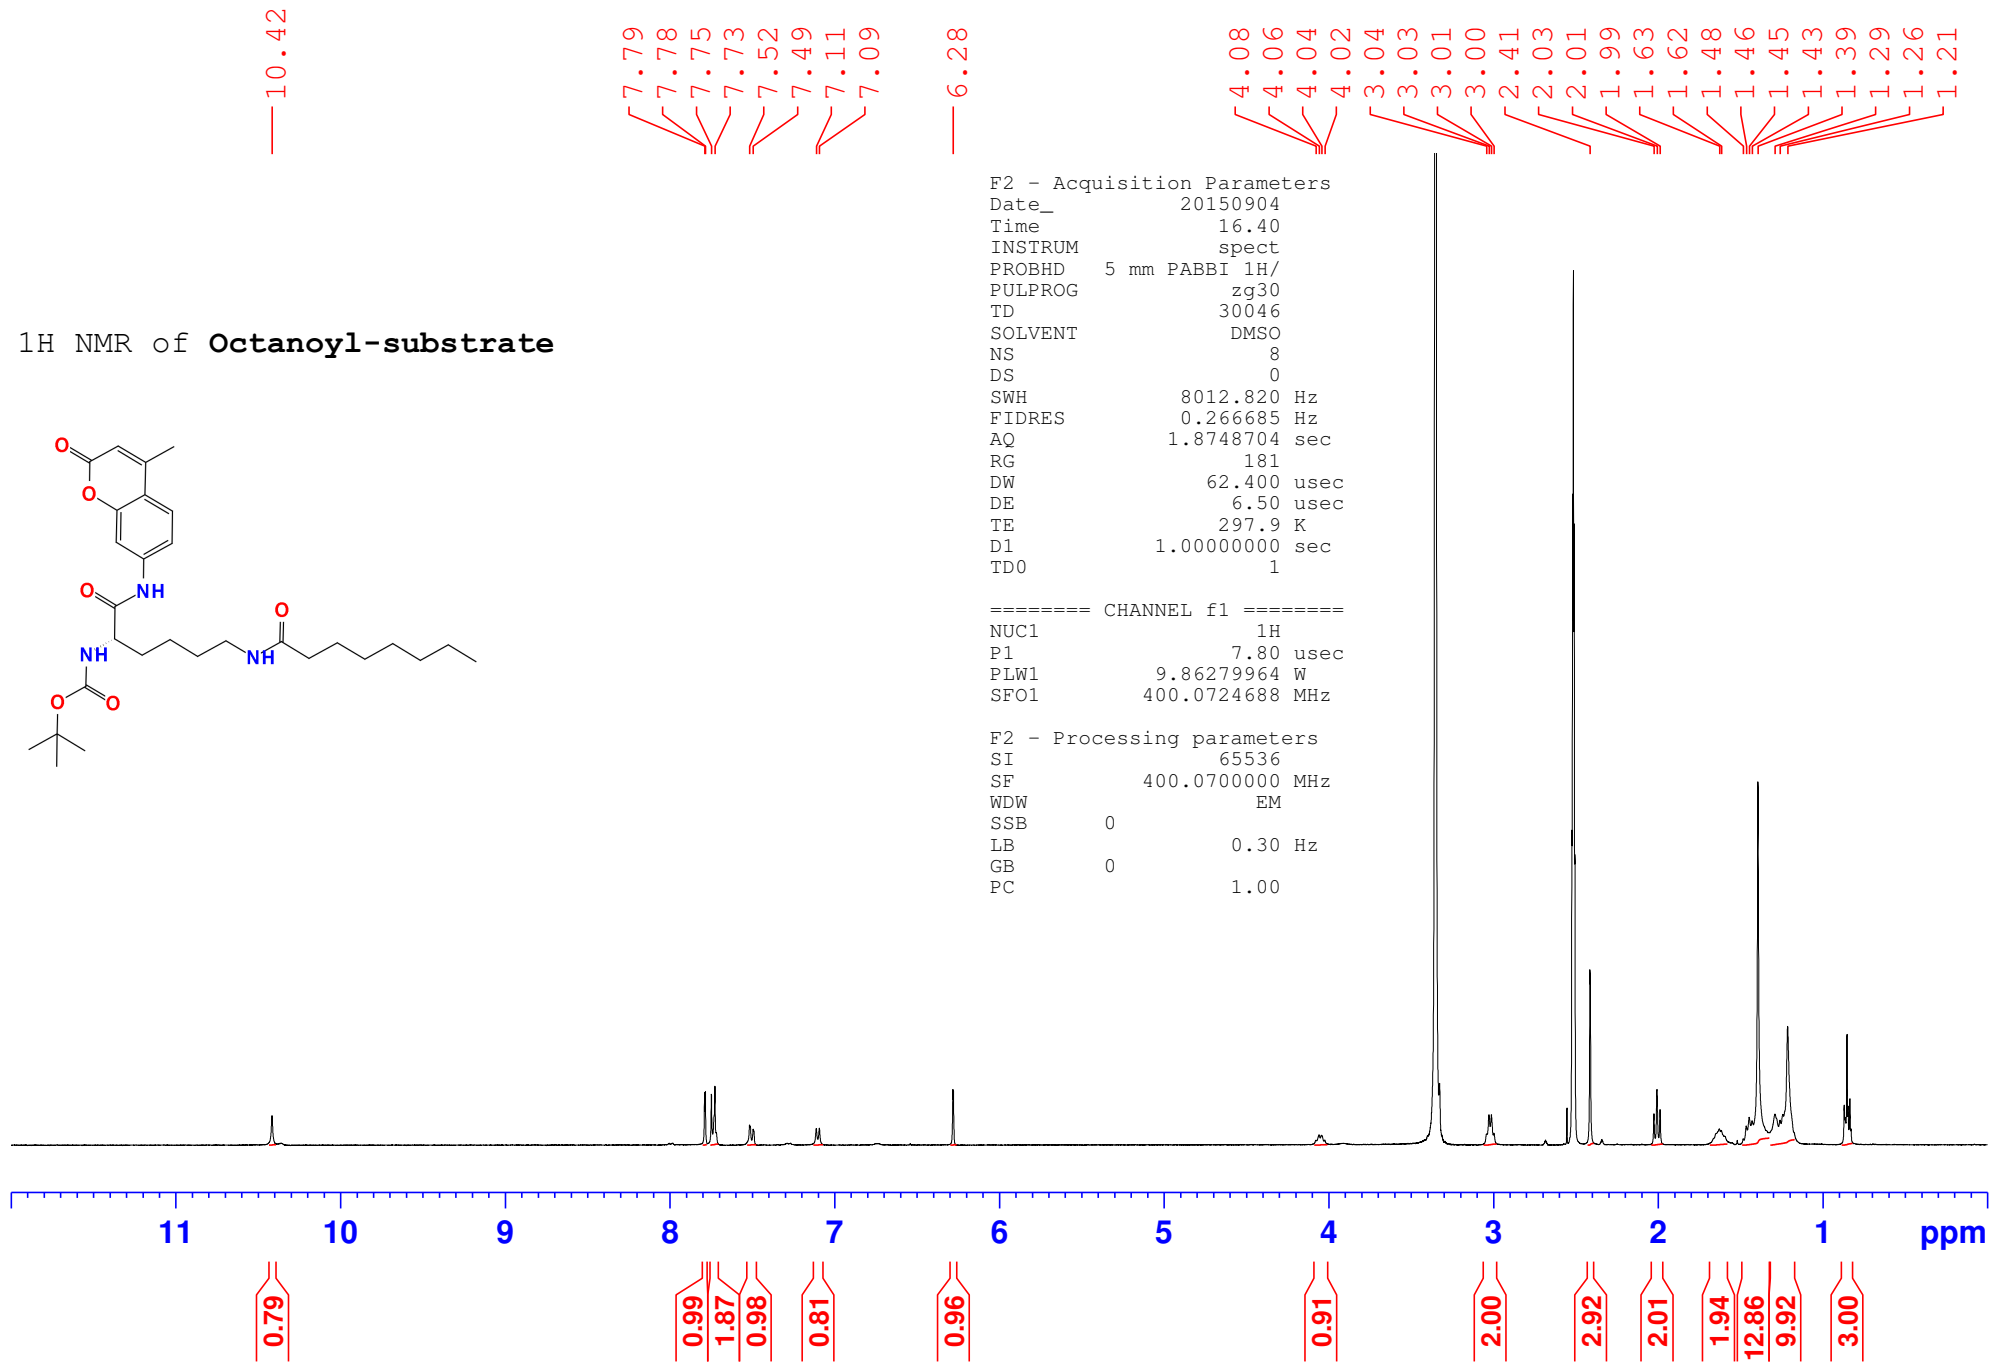

```

F2 - Acquisition Parameters
Date_      20150904
Time       16.40
INSTRUM    spect
PROBHD     5 mm PABBI 1H/
PULPROG    zg30
TD         30046
SOLVENT    DMSO
NS         8
DS         0
SWH        8012.820 Hz
FIDRES     0.266685 Hz
AQ         1.8748704 sec
RG         181
DW         62.400 usec
DE         6.50 usec
TE         297.9 K
D1         1.00000000 sec
D10        1
    
```

```

===== CHANNEL f1 =====
NUC1       1H
P1         7.80 usec
PLW1       9.86279964 W
SFO1       400.0724688 MHz
    
```

```

F2 - Processing parameters
SI         65536
SF         400.0700000 MHz
WDW        EM
SSB        0
LB         0.30 Hz
GB         0
PC         1.00
    
```

ppm

## HSQC of Octanoyl-substrate

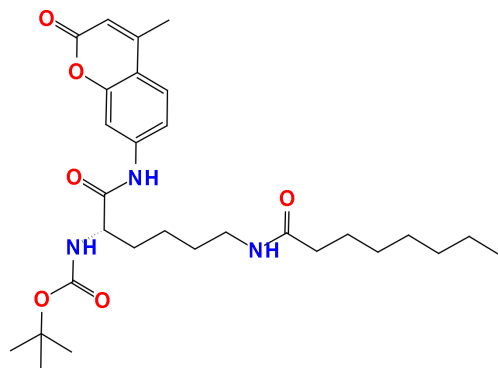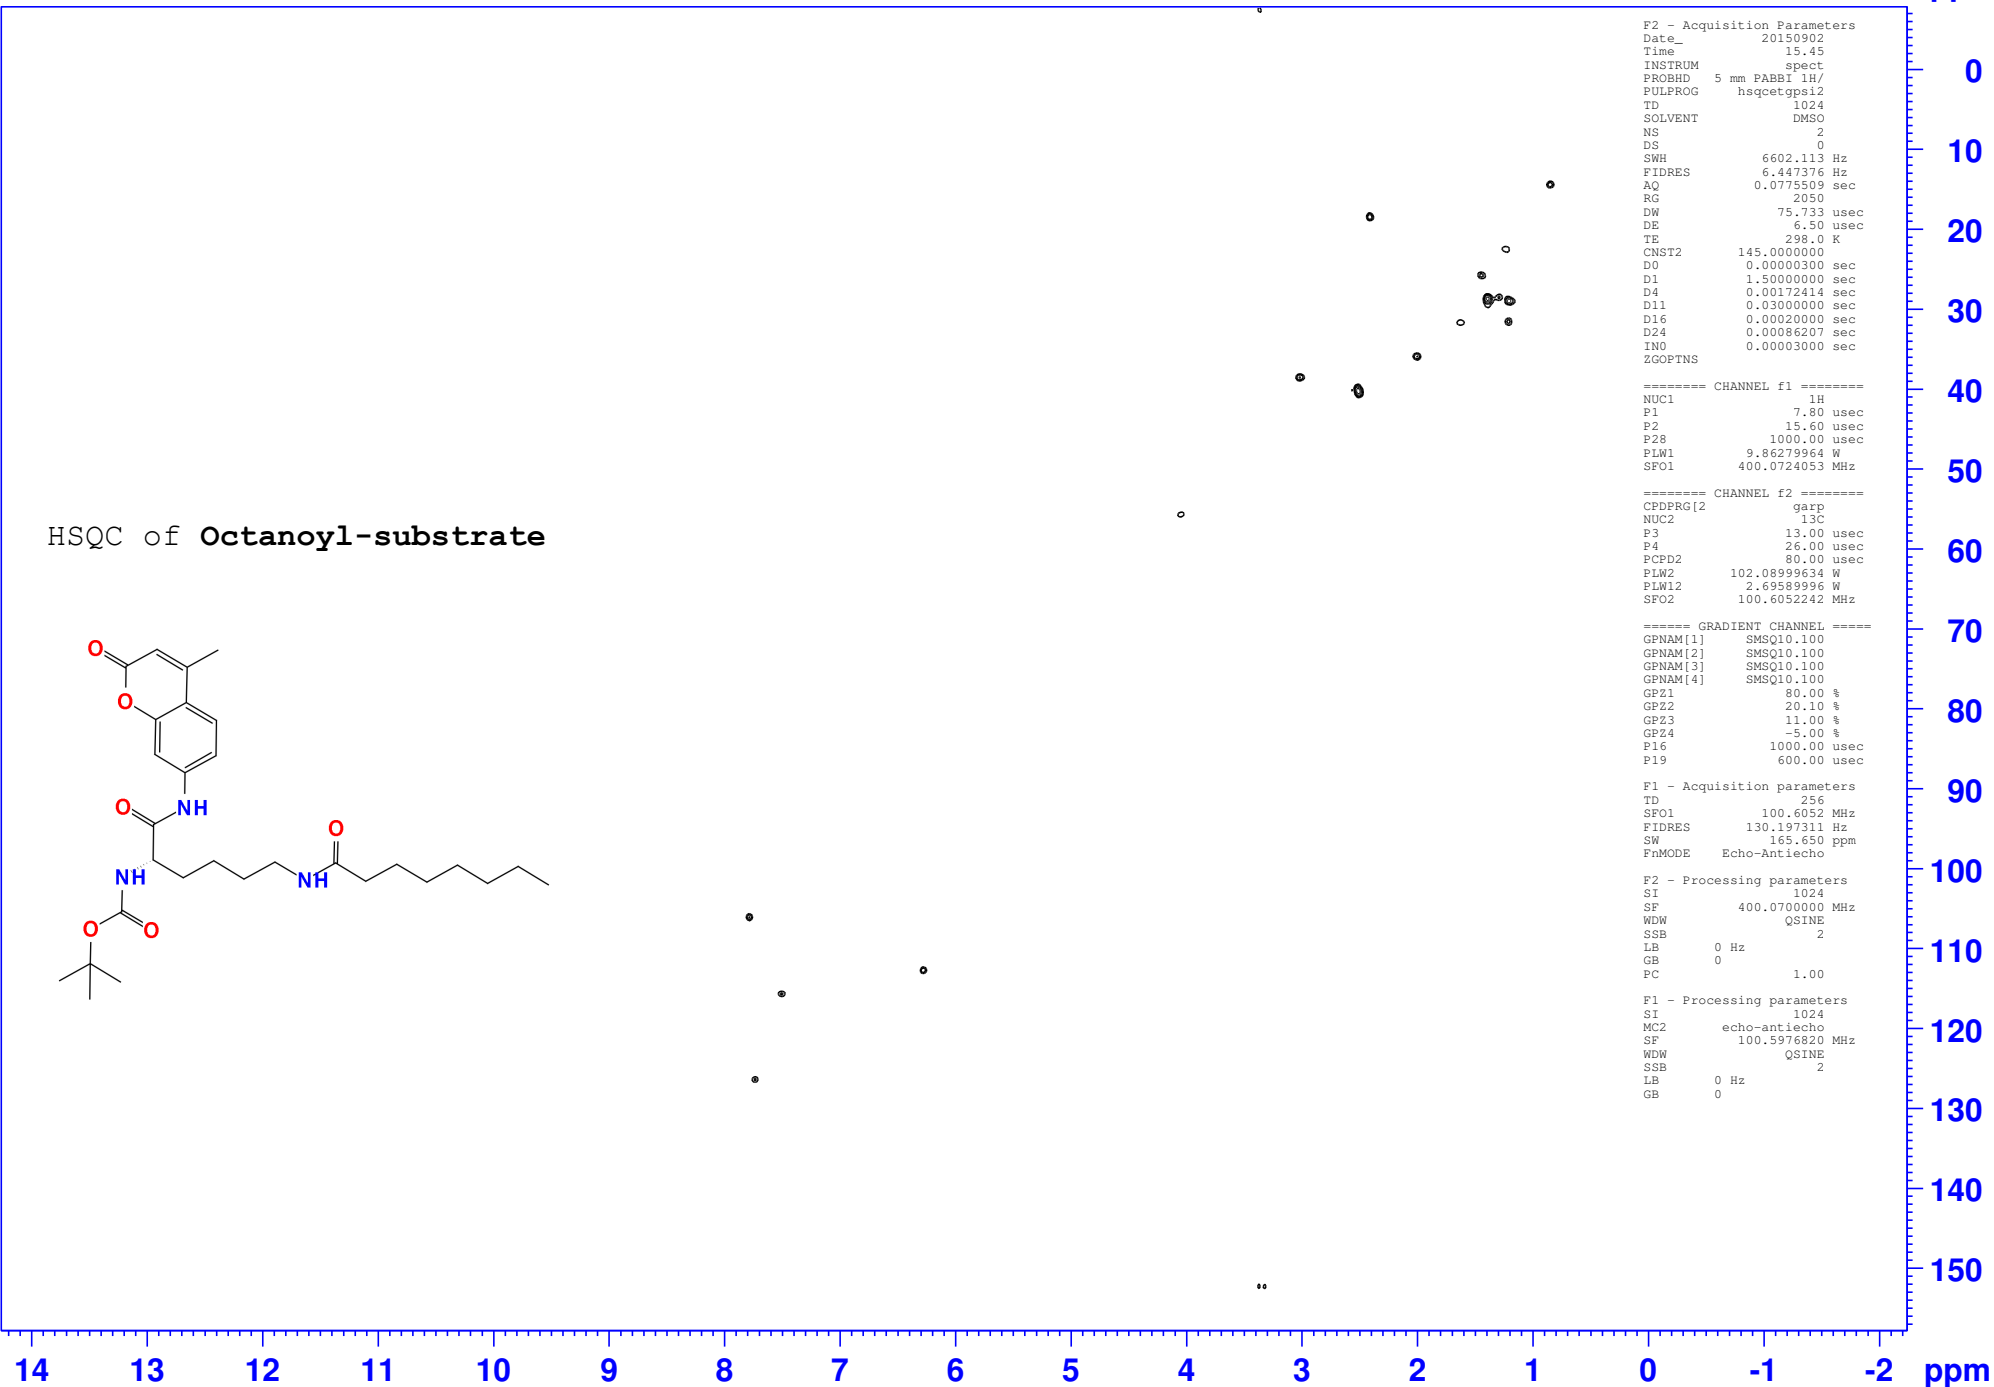

F2 - Acquisition Parameters  
 Date\_ 20150902  
 Time 15.45  
 INSTRUM spect  
 PROBHD 5 mm PABBI 1H/  
 PULPROG hsqcetgpsi2  
 TD 1024  
 SOLVENT DMSO  
 NS 2  
 DS 0  
 SWH 6602.113 Hz  
 FIDRES 6.447376 Hz  
 AQ 0.0775509 sec  
 RG 2050  
 DW 75.733 usec  
 DE 6.50 usec  
 TE 298.0 K  
 CNST2 145.0000000  
 D0 0.00000300 sec  
 D1 1.50000000 sec  
 D4 0.00172414 sec  
 D11 0.03000000 sec  
 D16 0.00020000 sec  
 D24 0.00086207 sec  
 INO 0.00003000 sec  
 ZGOPTNS

===== CHANNEL f1 =====  
 NUC1 1H  
 P1 7.80 usec  
 P2 15.60 usec  
 P28 1000.00 usec  
 PLW1 9.86279964 W  
 SFO1 400.0724053 MHz

===== CHANNEL f2 =====  
 CPDPRG[2] garp  
 NUC2 13C  
 P3 13.00 usec  
 P4 26.00 usec  
 PCPD2 80.00 usec  
 PLW2 102.08999634 W  
 PLW12 2.69589996 W  
 SFO2 100.6052242 MHz

===== GRADIENT CHANNEL =====  
 GPNAM[1] SMSQ10.100  
 GPNAM[2] SMSQ10.100  
 GPNAM[3] SMSQ10.100  
 GPNAM[4] SMSQ10.100  
 GPZ1 80.00 %  
 GPZ2 20.10 %  
 GPZ3 11.00 %  
 GPZ4 -5.00 %  
 P16 1000.00 usec  
 P19 600.00 usec

F1 - Acquisition parameters  
 TD 256  
 SFO1 100.6052 MHz  
 FIDRES 130.197311 Hz  
 SW 165.650 ppm  
 FrnMODE Echo-Antiecho

F2 - Processing parameters  
 SI 1024  
 SF 400.0700000 MHz  
 WDW QSINE  
 SSB 2  
 LB 0 Hz  
 GB 0  
 PC 1.00

F1 - Processing parameters  
 SI 1024  
 MC2 echo-antiecho  
 SF 100.5976820 MHz  
 WDW QSINE  
 SSB 2  
 LB 0 Hz  
 GB 0

1H NMR of TFA-substrate

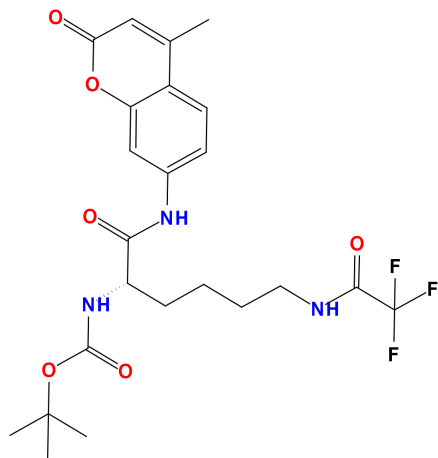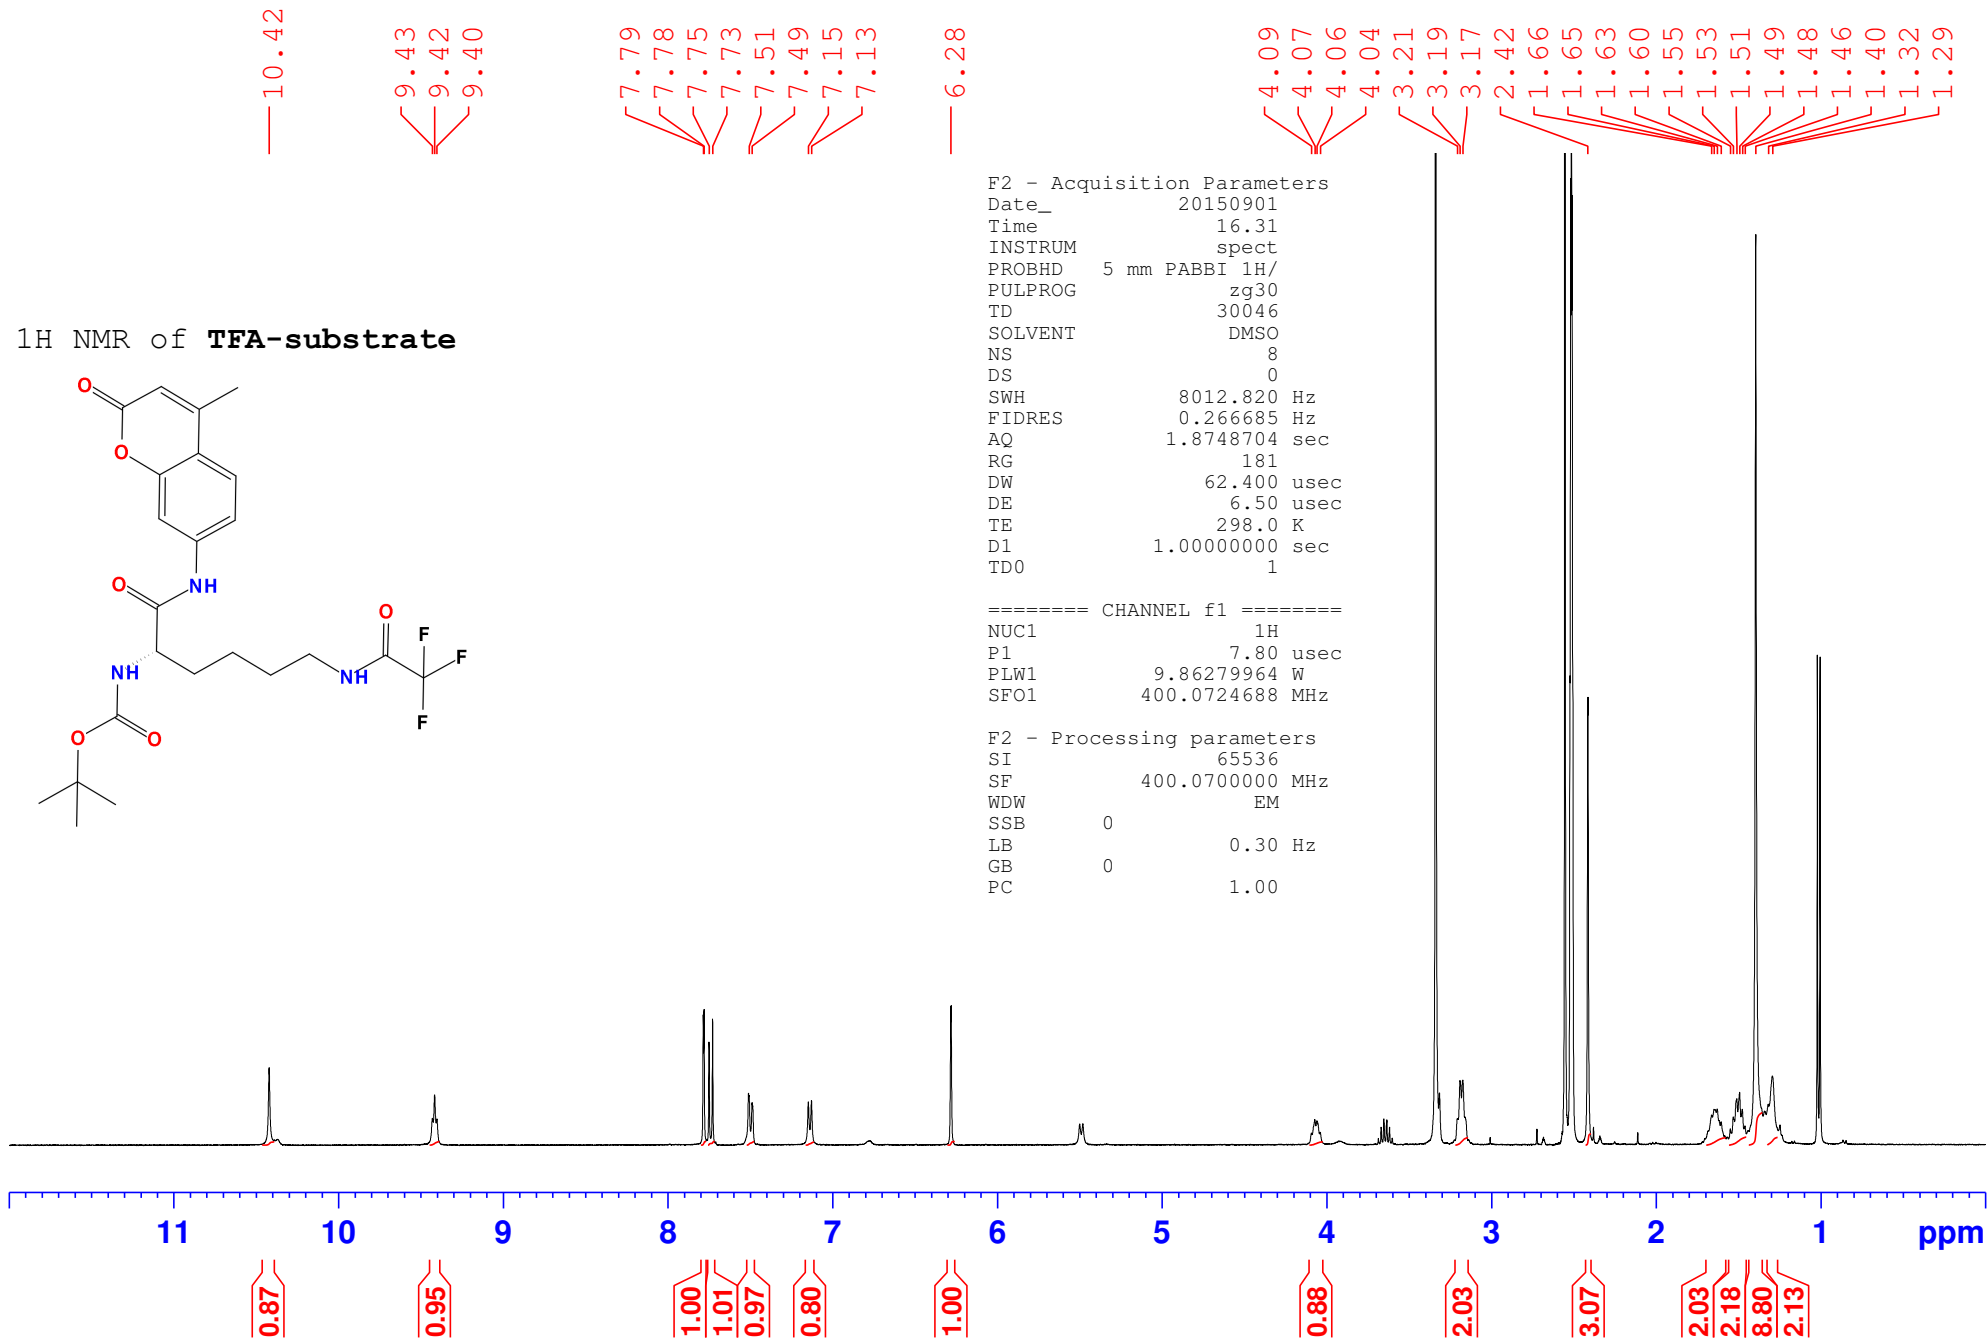

F2 - Acquisition Parameters  
 Date\_ 20150901  
 Time 16.31  
 INSTRUM spect  
 PROBHD 5 mm PABBI 1H/  
 PULPROG zg30  
 TD 30046  
 SOLVENT DMSO  
 NS 8  
 DS 0  
 SWH 8012.820 Hz  
 FIDRES 0.266685 Hz  
 AQ 1.8748704 sec  
 RG 181  
 DW 62.400 usec  
 DE 6.50 usec  
 TE 298.0 K  
 D1 1.00000000 sec  
 TD0 1

==== CHANNEL f1 =====  
 NUC1 1H  
 P1 7.80 usec  
 PLW1 9.86279964 W  
 SFO1 400.0724688 MHz

F2 - Processing parameters  
 SI 65536  
 SF 400.0700000 MHz  
 WDW EM  
 SSB 0  
 LB 0.30 Hz  
 GB 0  
 PC 1.00

ppm

```

F2 - Acquisition Parameters
Date_      20150901
Time       16.35
INSTRUM    spect
PROBHD     5 mm PABBI 1H/
PULPROG    hsqcetgpsi2
TD         1024
SOLVENT    DMSO
NS         2
DS         0
SWH        6602.113 Hz
FIDRES     6.447376 Hz
AQ         0.0775509 sec
RG         2050
DW         75.733 usec
DE         6.50 usec
TE         298.0 K
CNST2     145.0000000
D0         0.00000300 sec
D1         1.50000000 sec
D4         0.00172414 sec
D11        0.03000000 sec
D16        0.00020000 sec
D24        0.00086207 sec
INO        0.00003000 sec
ZGOPTNS

```

```

===== CHANNEL f1 =====
NUC1       1H
P1         7.80 usec
P2         15.60 usec
P28        1000.00 usec
PLW1       9.86279964 W
SFO1       400.0724053 MHz

```

```

===== CHANNEL f2 =====
CPDPRG[2]  garp
NUC2       13C
P3         13.00 usec
P4         26.00 usec
PCPD2      80.00 usec
PLW2       102.08999634 W
PLW12      2.69589996 W
SFO2       100.6052242 MHz

```

```

===== GRADIENT CHANNEL =====
GPNAM[1]   SMSQ10.100
GPNAM[2]   SMSQ10.100
GPNAM[3]   SMSQ10.100
GPNAM[4]   SMSQ10.100
GPZ1       80.00 %
GPZ2       20.10 %
GPZ3       11.00 %
GPZ4       -5.00 %
P16        1000.00 usec
P19        600.00 usec

```

```

F1 - Acquisition parameters
TD         256
SFO1       100.6052 MHz
FIDRES     130.197311 Hz
SW         165.650 ppm
FrnMODE    Echo-Antiecho

```

```

F2 - Processing parameters
SI         1024
SF         400.0700000 MHz
WDW        QSINE
SSB        2
LB         0 Hz
GB         0
PC         1.00

```

```

F1 - Processing parameters
SI         1024
MC2        echo-antiecho
SF         100.5976820 MHz
WDW        QSINE
SSB        2
LB         0 Hz
GB         0

```

## HSQC of TFA-substrate

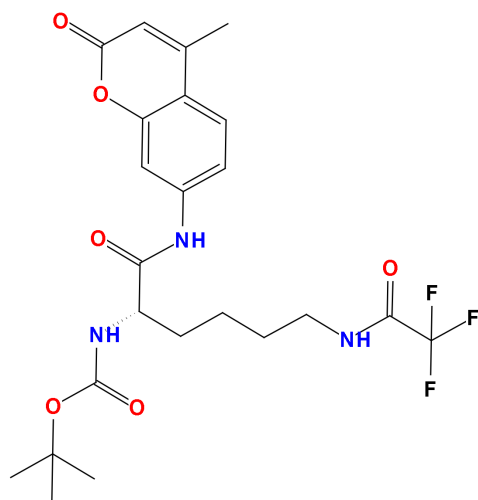

14 13 12 11 10 9 8 7 6 5 4 3 2 1 0 -1 -2 ppm



1H NMR of Glutaryl-substrate

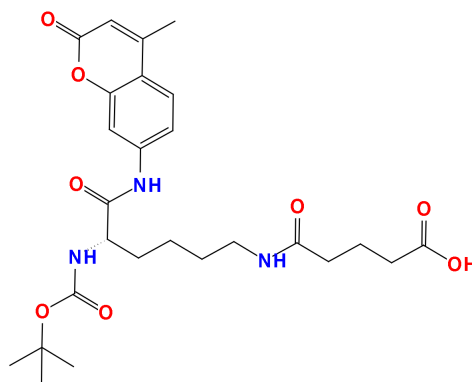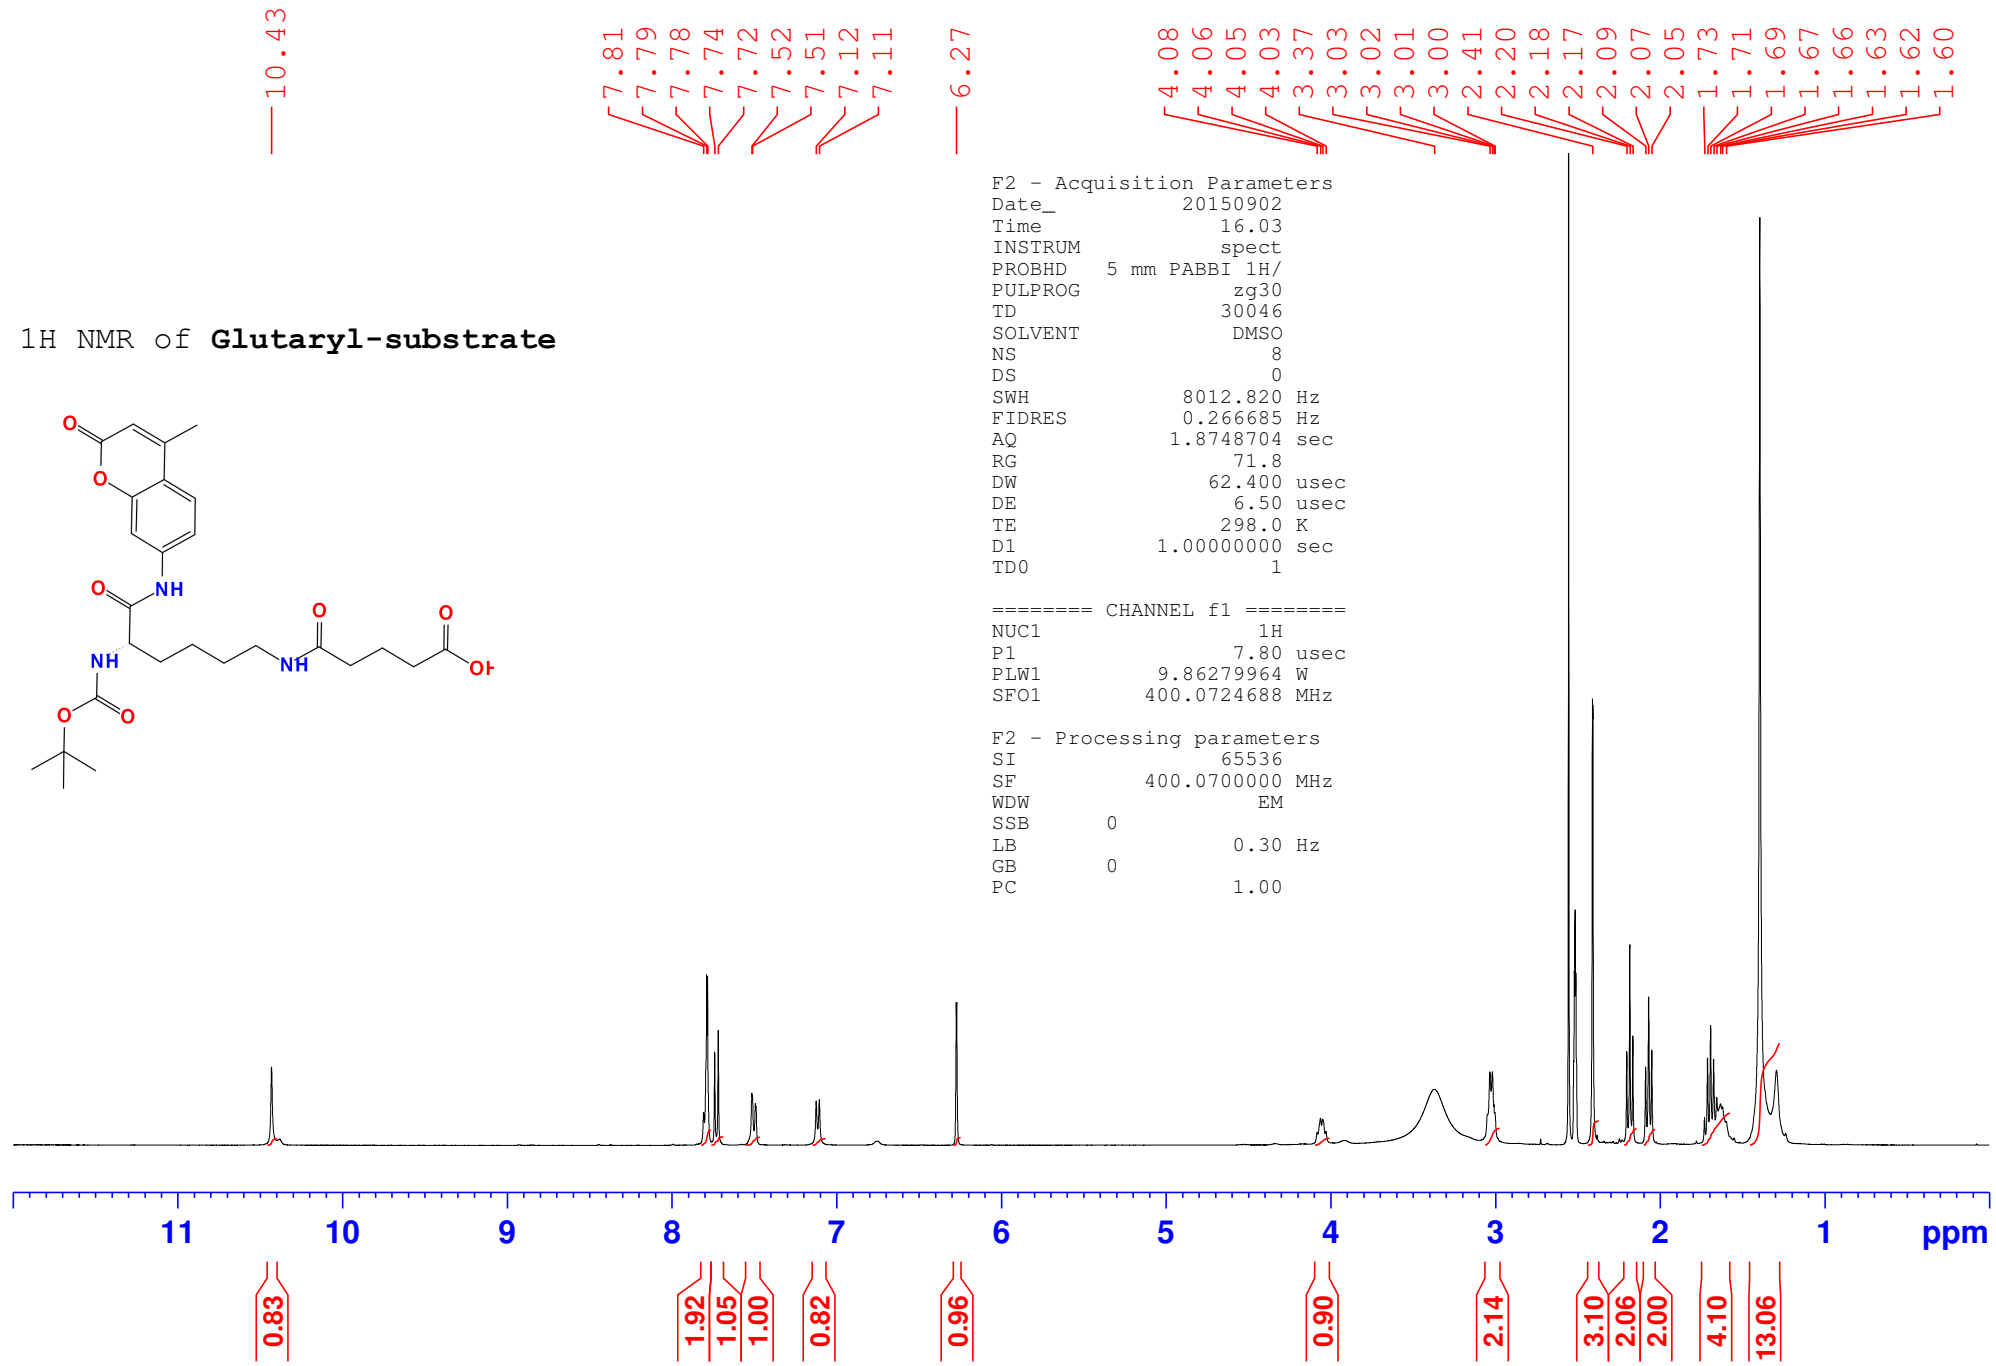

F2 - Acquisition Parameters  
 Date\_ 20150902  
 Time 16.03  
 INSTRUM spect  
 PROBHD 5 mm PABBI 1H/  
 PULPROG zg30  
 TD 30046  
 SOLVENT DMSO  
 NS 8  
 DS 0  
 SWH 8012.820 Hz  
 FIDRES 0.266685 Hz  
 AQ 1.8748704 sec  
 RG 71.8  
 DW 62.400 usec  
 DE 6.50 usec  
 TE 298.0 K  
 D1 1.00000000 sec  
 TD0 1

==== CHANNEL f1 =====  
 NUC1 1H  
 P1 7.80 usec  
 PLW1 9.86279964 W  
 SFO1 400.0724688 MHz

F2 - Processing parameters  
 SI 65536  
 SF 400.0700000 MHz  
 WDW EM  
 SSB 0  
 LB 0.30 Hz  
 GB 0  
 PC 1.00

ppm

## HSQC of Glutaryl-substrate

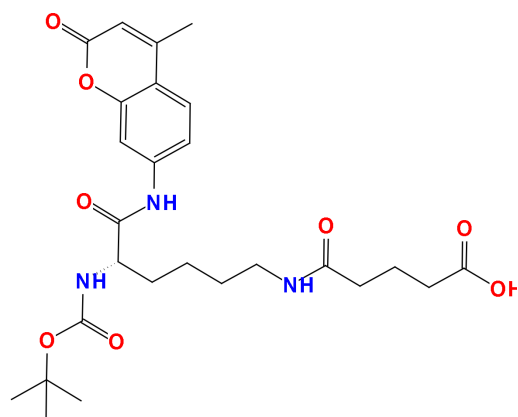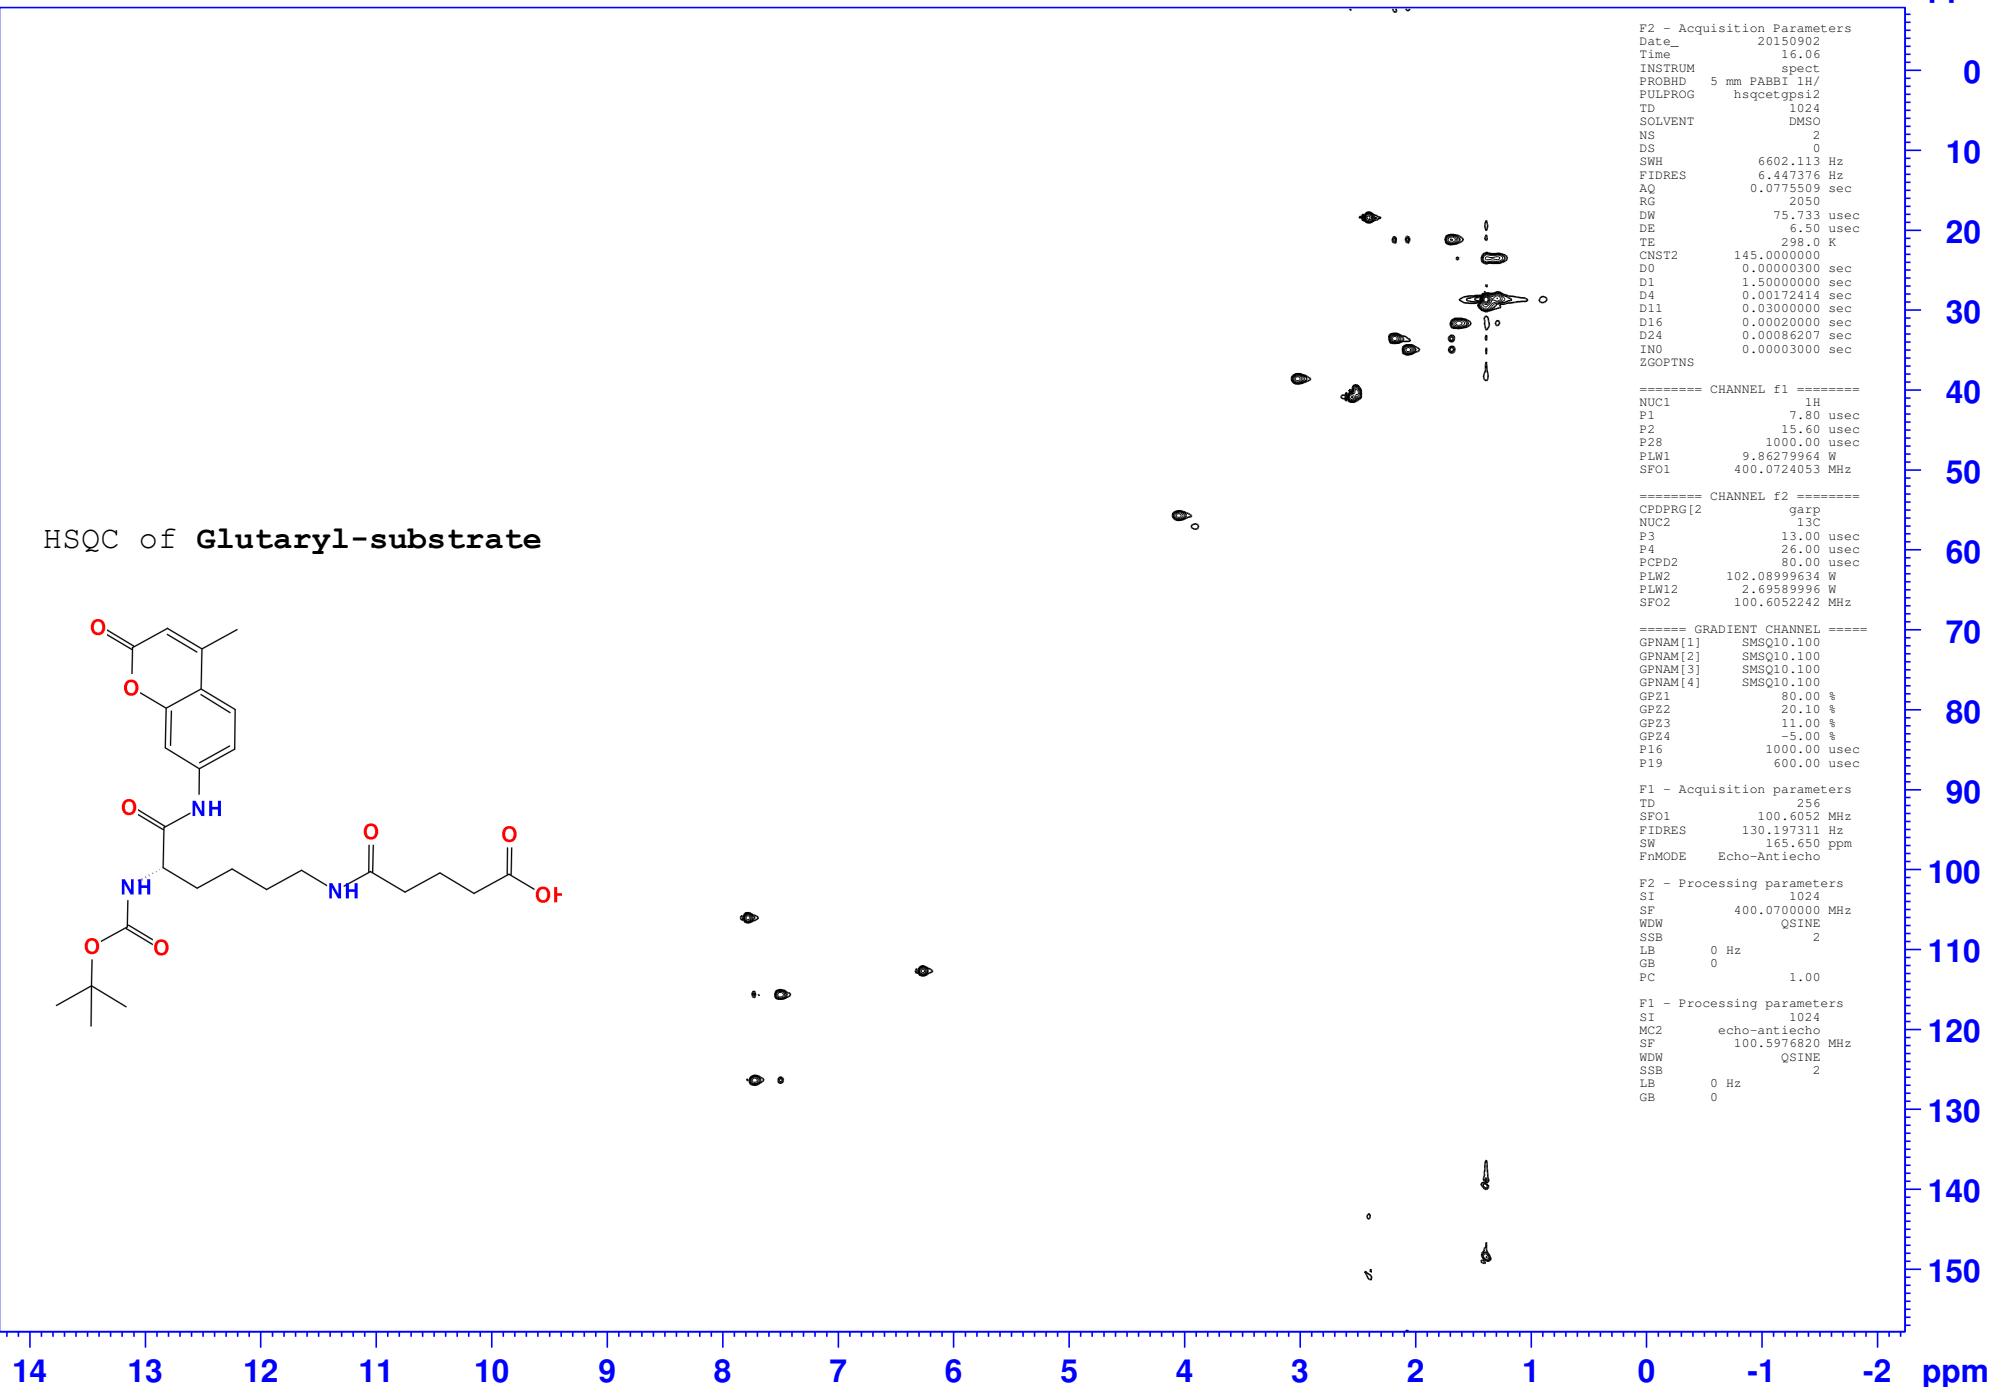

F2 - Acquisition Parameters  
 Date\_ 20150902  
 Time 16.06  
 INSTRUM spect  
 PROBHD 5 mm PABBI 1H/  
 PULPROG hsqcetgpsi2  
 TD 1024  
 SOLVENT DMSO  
 NS 2  
 DS 0  
 SWH 6602.113 Hz  
 FIDRES 6.447376 Hz  
 AQ 0.0775509 sec  
 RG 2050  
 DW 75.733 usec  
 DE 6.50 usec  
 TE 298.0 K  
 CNST2 145.0000000  
 D0 0.00000300 sec  
 D1 1.50000000 sec  
 D4 0.00172414 sec  
 D11 0.03000000 sec  
 D16 0.00020000 sec  
 D24 0.00086207 sec  
 INO 0.00003000 sec  
 ZGOPTNS

===== CHANNEL f1 =====  
 NUC1 1H  
 P1 7.80 usec  
 P2 15.60 usec  
 P28 1000.00 usec  
 PLW1 9.86279964 W  
 SFO1 400.0724053 MHz

===== CHANNEL f2 =====  
 CPDPRG[2] garp  
 NUC2 13C  
 P3 13.00 usec  
 P4 26.00 usec  
 PCPD2 80.00 usec  
 PLW2 102.08999634 W  
 PLW12 2.69589996 W  
 SFO2 100.6052242 MHz

===== GRADIENT CHANNEL =====  
 GPNAM[1] SMSQ10.100  
 GPNAM[2] SMSQ10.100  
 GPNAM[3] SMSQ10.100  
 GPNAM[4] SMSQ10.100  
 GPZ1 80.00 %  
 GPZ2 20.10 %  
 GPZ3 11.00 %  
 GPZ4 -5.00 %  
 P16 1000.00 usec  
 P19 600.00 usec

F1 - Acquisition parameters  
 TD 256  
 SFO1 100.6052 MHz  
 FIDRES 130.197311 Hz  
 SW 165.650 ppm  
 FrnMODE Echo-Antiecho

F2 - Processing parameters  
 SI 1024  
 SF 400.0700000 MHz  
 WDW QSIINE  
 SSB 2  
 LB 0 Hz  
 GB 0  
 PC 1.00

F1 - Processing parameters  
 SI 1024  
 MC2 echo-antiecho  
 SF 100.5976820 MHz  
 WDW QSIINE  
 SSB 2  
 LB 0 Hz  
 GB 0

1H NMR of Adipoyl-substrate

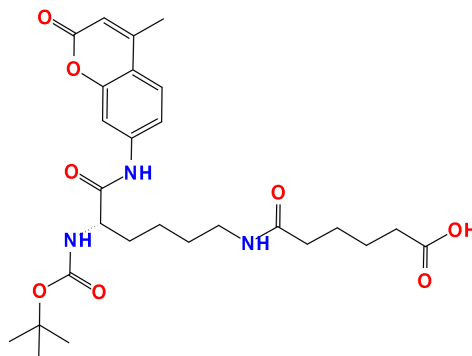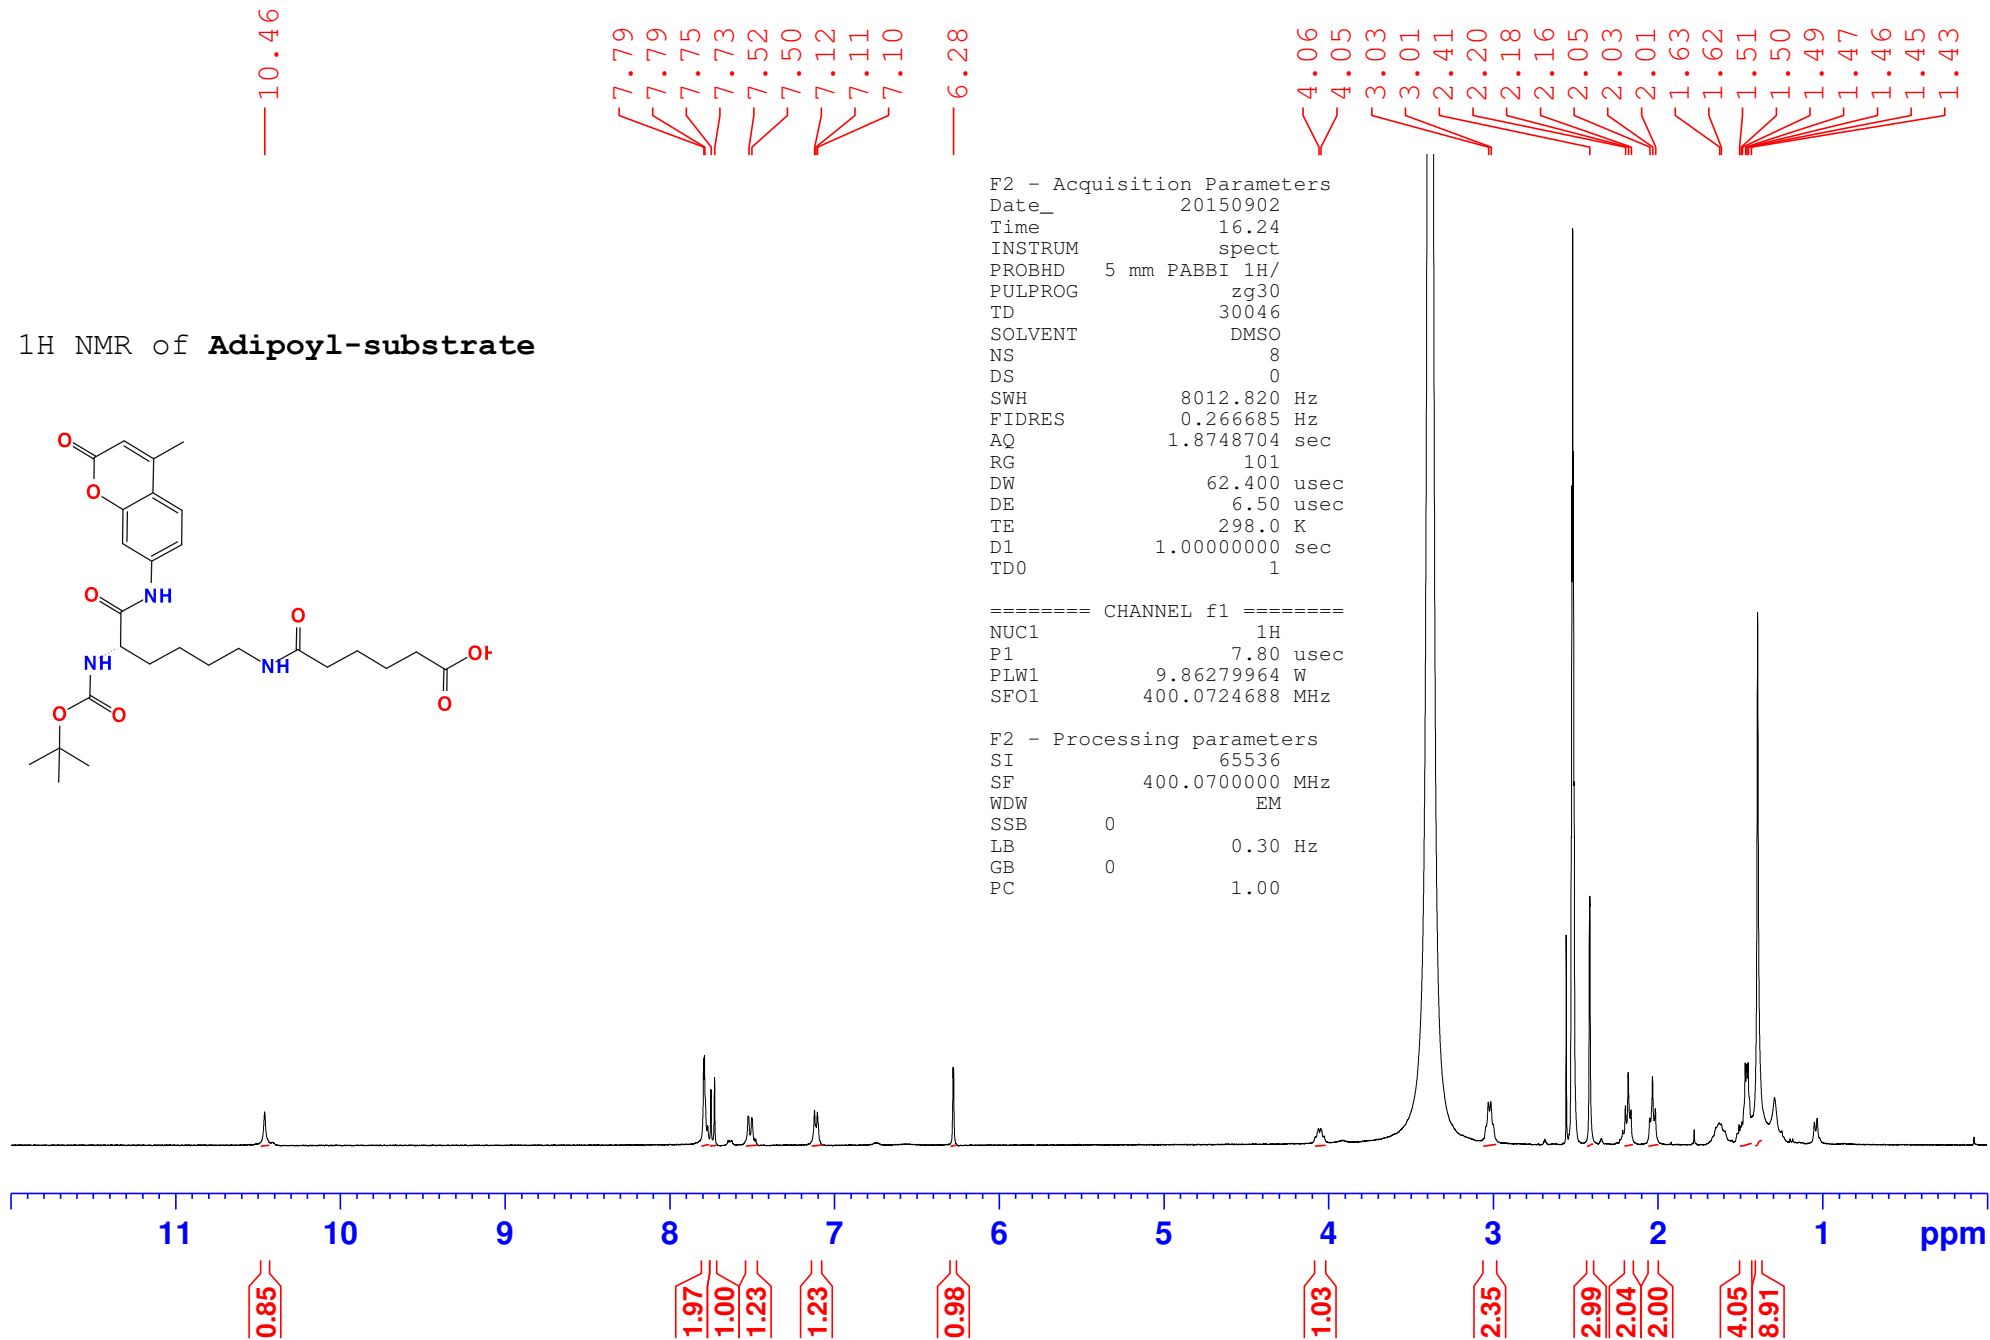

```

F2 - Acquisition Parameters
Date_      20150902
Time       16.24
INSTRUM    spect
PROBHD     5 mm PABBI 1H/
PULPROG    zg30
TD         30046
SOLVENT    DMSO
NS         8
DS         0
SWH        8012.820 Hz
FIDRES     0.266685 Hz
AQ         1.8748704 sec
RG         101
DW         62.400 usec
DE         6.50 usec
TE         298.0 K
D1         1.00000000 sec
D10        1

===== CHANNEL f1 =====
NUC1       1H
P1         7.80 usec
PLW1       9.86279964 W
SFO1       400.0724688 MHz

F2 - Processing parameters
SI         65536
SF         400.0700000 MHz
WDW        EM
SSB        0
LB         0.30 Hz
GB         0
PC         1.00
    
```

ppm

## HSQC of Adipoyl-substrate

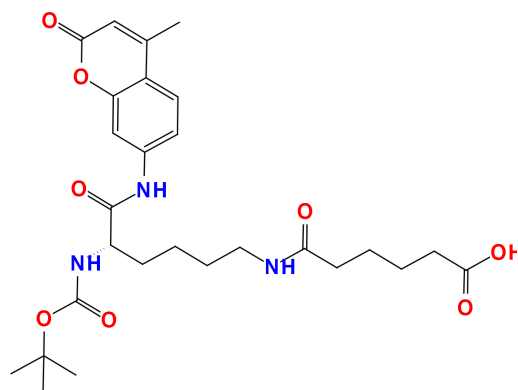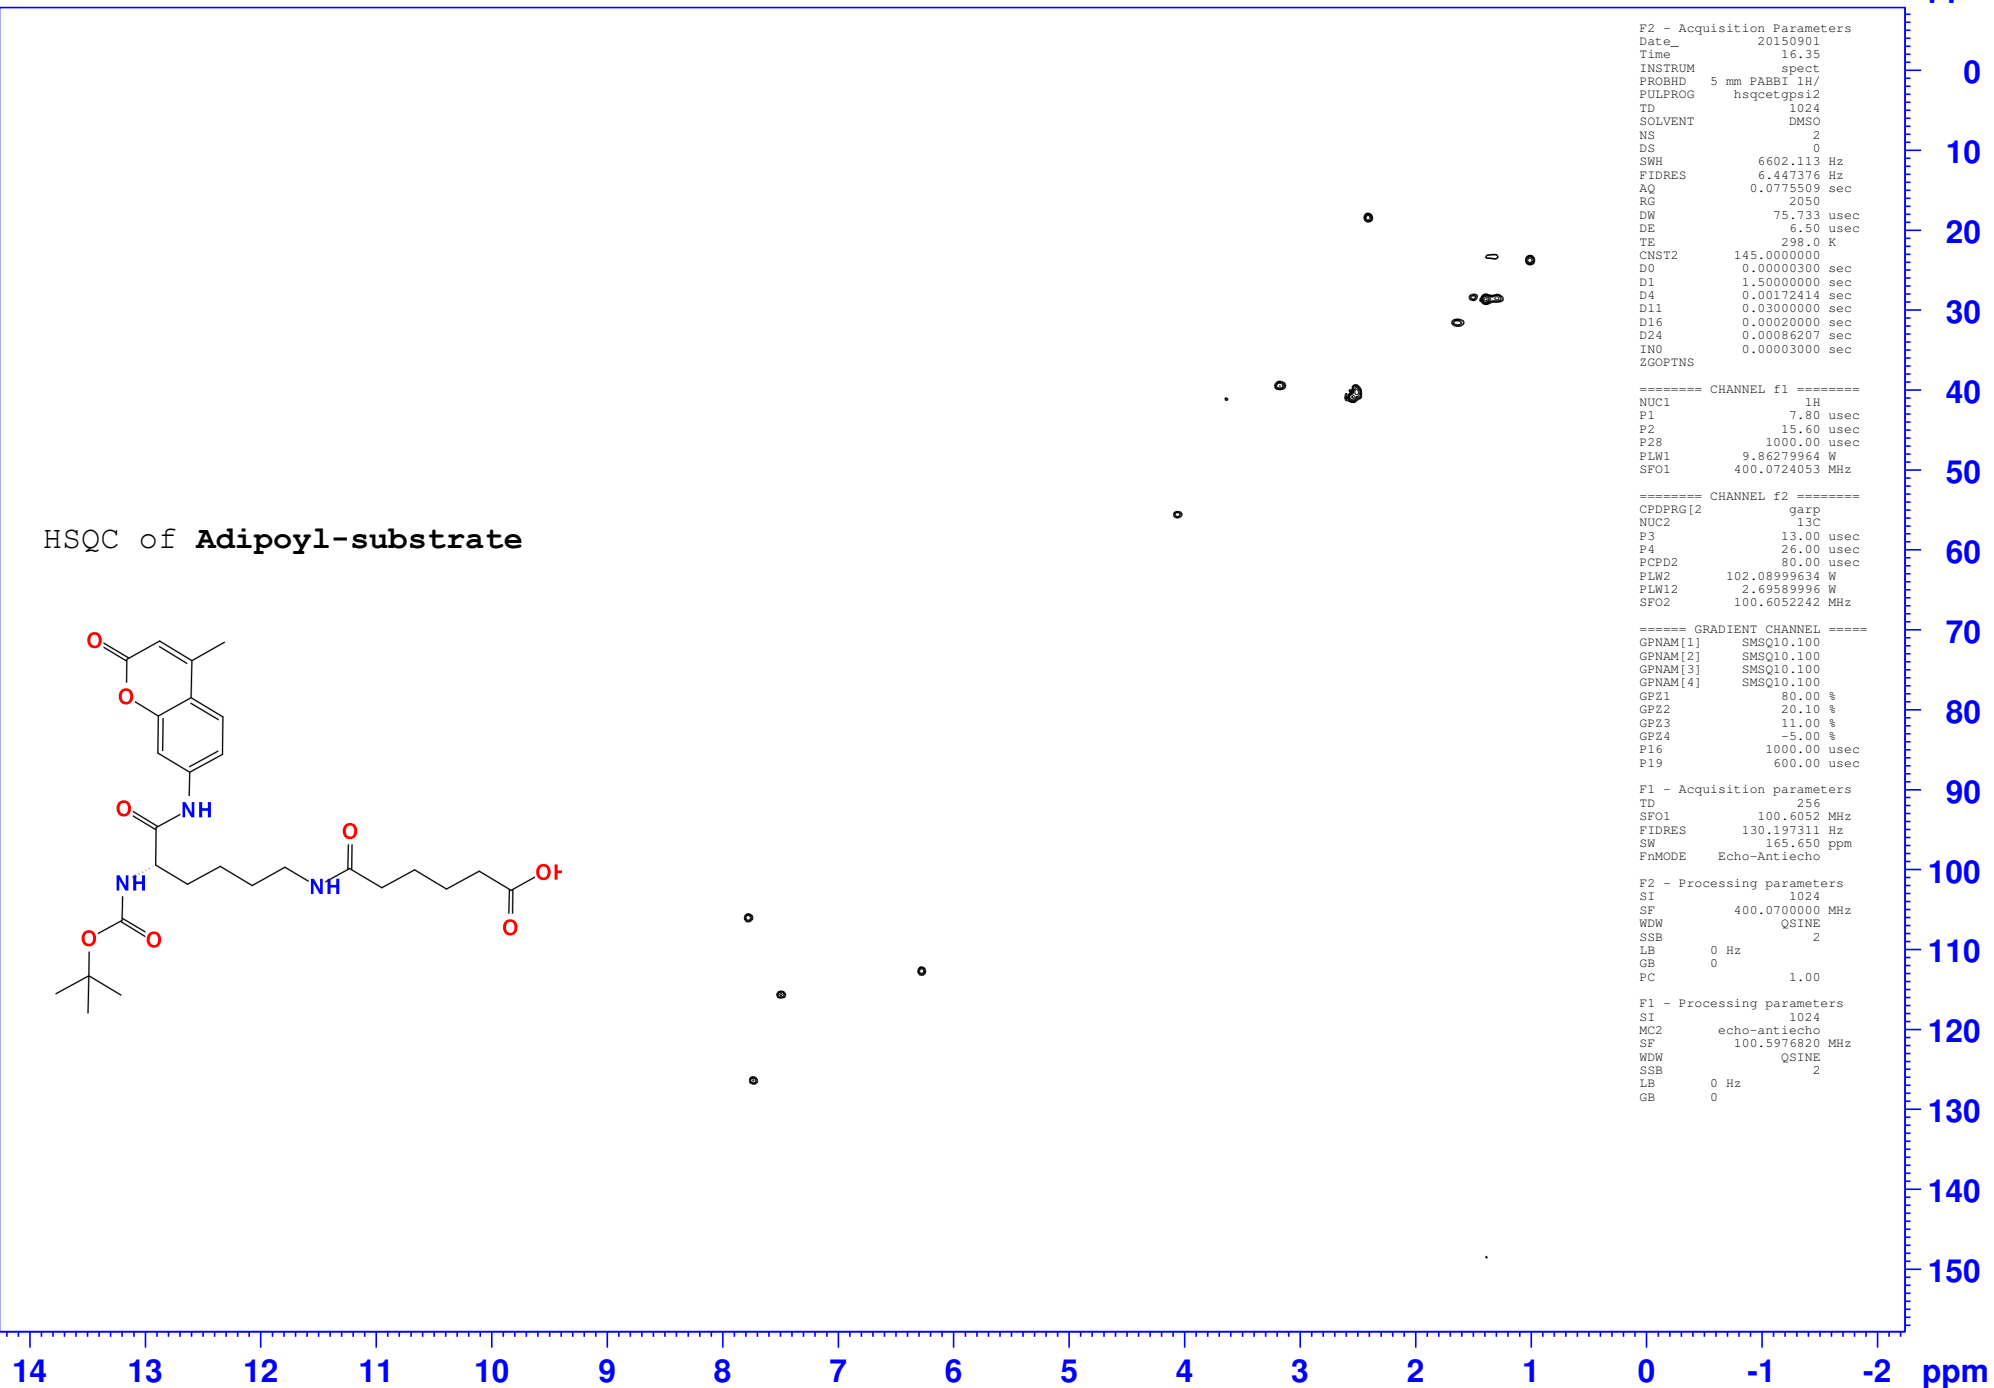

F2 - Acquisition Parameters  
 Date\_ 20150901  
 Time 16.35  
 INSTRUM spect  
 PROBHD 5 mm PABBI 1H/  
 PULPROG hsqcetgpsi2  
 TD 1024  
 SOLVENT DMSO  
 NS 2  
 DS 0  
 SWH 6602.113 Hz  
 FIDRES 6.447376 Hz  
 AQ 0.0775509 sec  
 RG 2050  
 DW 75.733 usec  
 DE 6.50 usec  
 TE 298.0 K  
 CNST2 145.0000000  
 D0 0.00000300 sec  
 D1 1.50000000 sec  
 D4 0.00172414 sec  
 D11 0.03000000 sec  
 D16 0.00020000 sec  
 D24 0.00086207 sec  
 INO 0.00003000 sec  
 ZGOPTNS

===== CHANNEL f1 =====  
 NUC1 1H  
 P1 7.80 usec  
 P2 15.60 usec  
 P28 1000.00 usec  
 PLW1 9.86279964 W  
 SFO1 400.0724053 MHz

===== CHANNEL f2 =====  
 CPDPRG[2] garp  
 NUC2 13C  
 P3 13.00 usec  
 P4 26.00 usec  
 PCPD2 80.00 usec  
 PLW2 102.08999634 W  
 PLW12 2.69589996 W  
 SFO2 100.6052242 MHz

===== GRADIENT CHANNEL =====  
 GPNAM[1] SMSQ10.100  
 GPNAM[2] SMSQ10.100  
 GPNAM[3] SMSQ10.100  
 GPNAM[4] SMSQ10.100  
 GPZ1 80.00 %  
 GPZ2 20.10 %  
 GPZ3 11.00 %  
 GPZ4 -5.00 %  
 P16 1000.00 usec  
 P19 600.00 usec

F1 - Acquisition parameters  
 TD 256  
 SFO1 100.6052 MHz  
 FIDRES 130.197311 Hz  
 SW 165.650 ppm  
 FRMODE Echo-Antiecho

F2 - Processing parameters  
 SI 1024  
 SF 400.0700000 MHz  
 WDW QSINE  
 SSB 2  
 LB 0 Hz  
 GB 0  
 PC 1.00

F1 - Processing parameters  
 SI 1024  
 MC2 echo-antiecho  
 SF 100.5976820 MHz  
 WDW QSINE  
 SSB 2  
 LB 0 Hz  
 GB 0

<sup>1</sup>H NMR of **1**

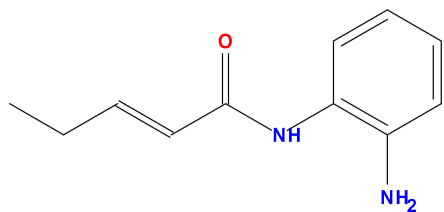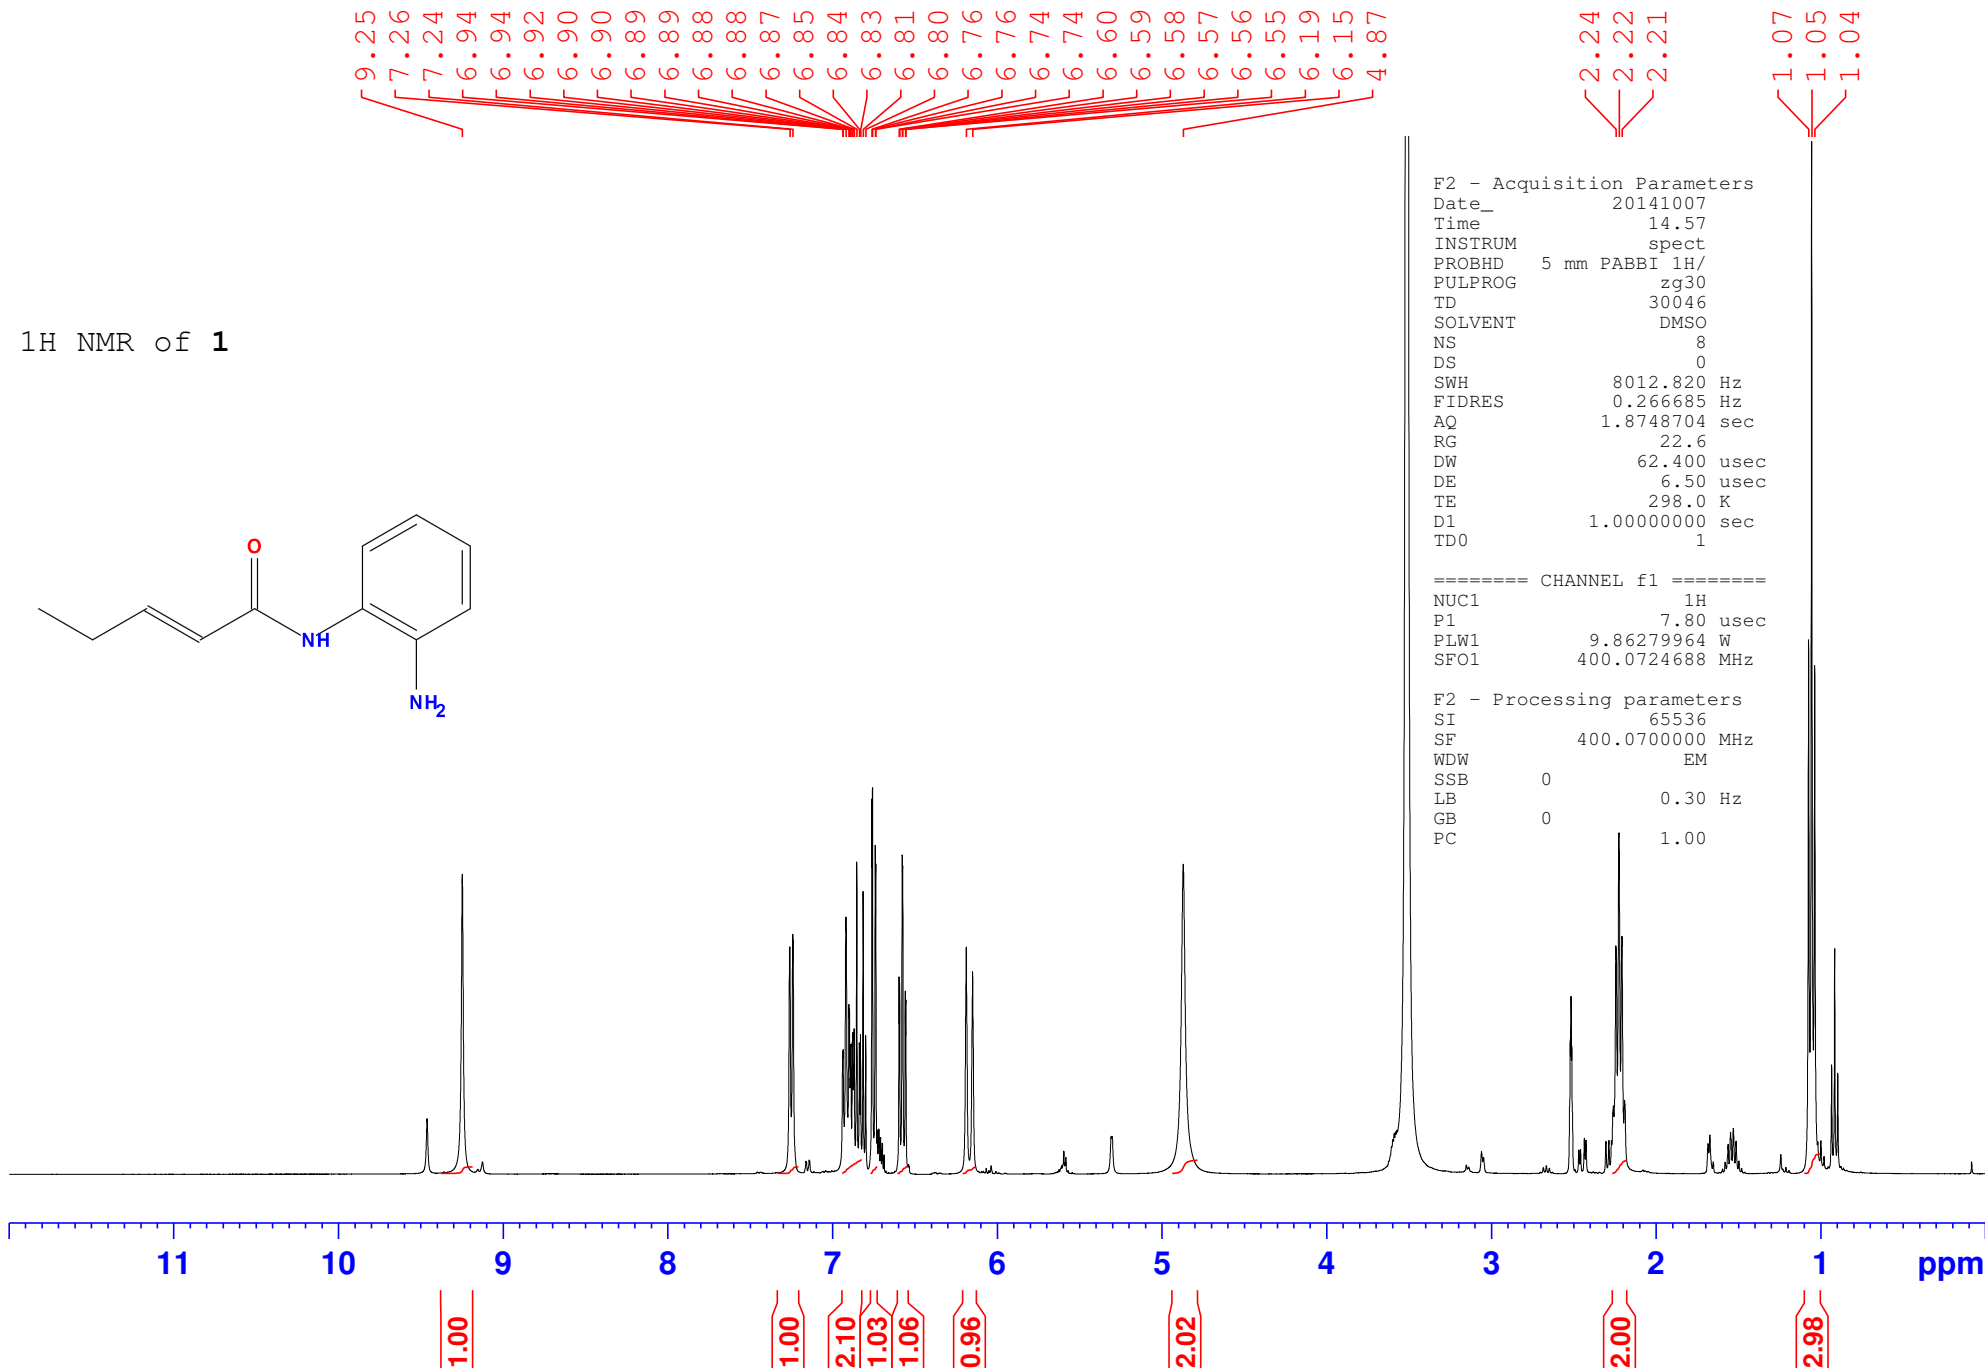

```

F2 - Acquisition Parameters
Date_      20141007
Time       14.57
INSTRUM    spect
PROBHD     5 mm PABBI 1H/
PULPROG    zg30
TD         30046
SOLVENT    DMSO
NS         8
DS         0
SWH        8012.820 Hz
FIDRES     0.266685 Hz
AQ         1.8748704 sec
RG         22.6
DW         62.400 usec
DE         6.50 usec
TE         298.0 K
D1         1.00000000 sec
TD0        1

===== CHANNEL f1 =====
NUC1       1H
P1         7.80 usec
PLW1       9.86279964 W
SFO1       400.0724688 MHz

F2 - Processing parameters
SI         65536
SF         400.0700000 MHz
WDW        EM
SSB        0
LB         0.30 Hz
GB         0
PC         1.00
    
```

13C NMR of 1

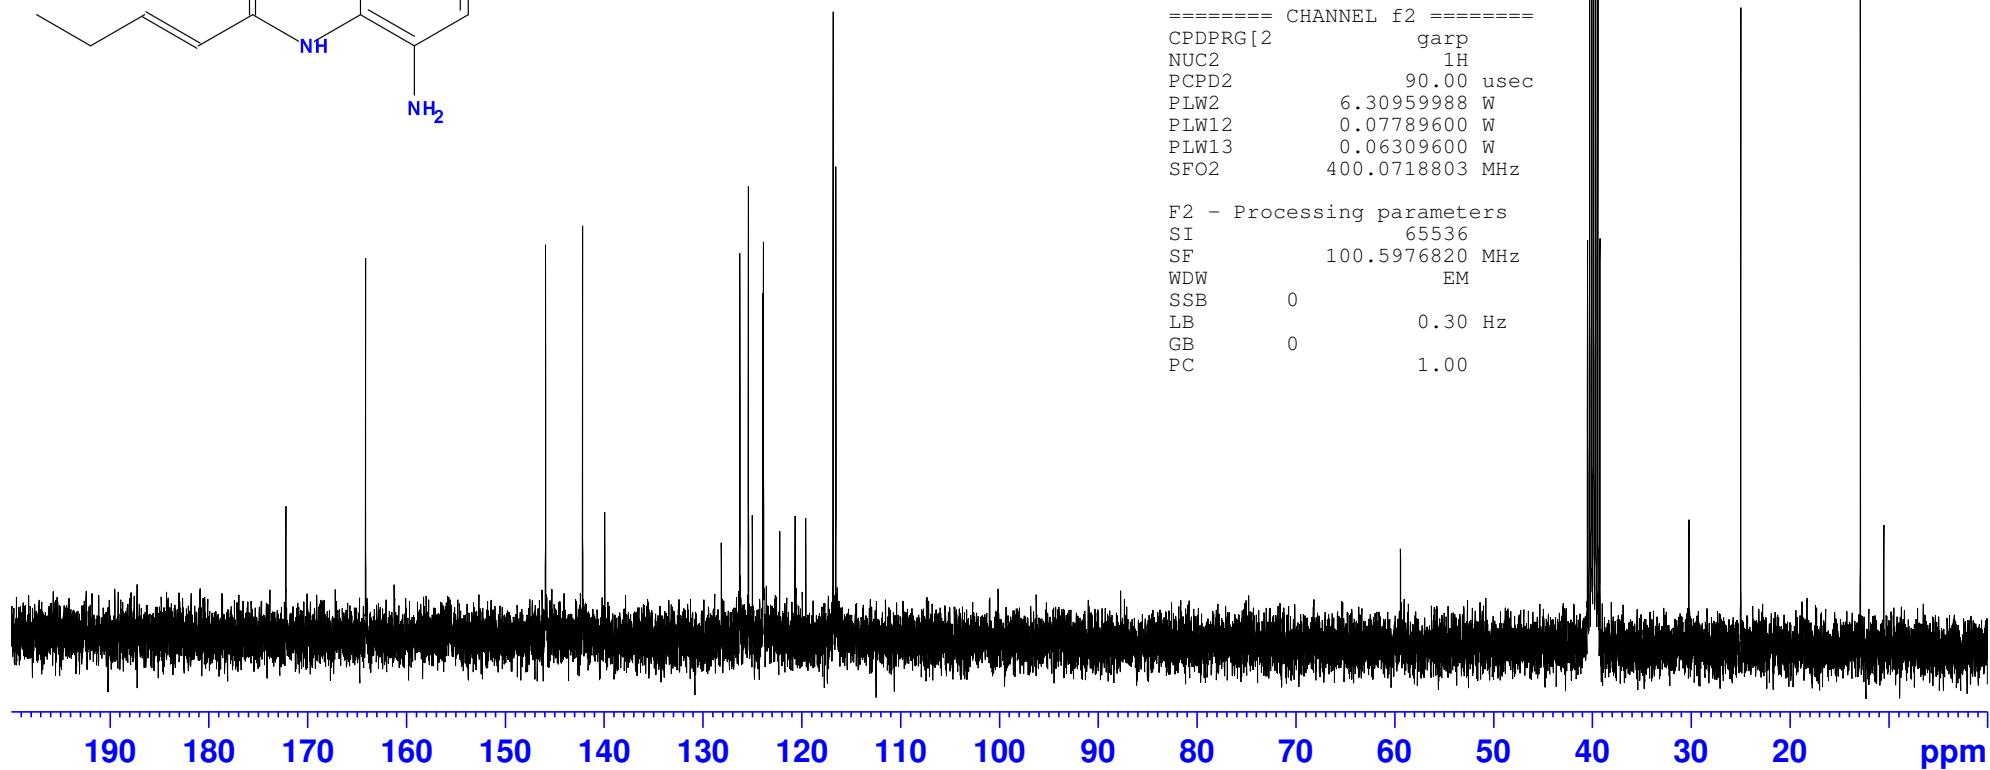

— 172.21  
 — 164.13  
 — 145.92  
 — 142.17  
 — 126.26  
 — 125.40  
 — 123.96  
 — 123.88  
 — 116.82  
 — 116.55

F2 - Acquisition Parameters  
 Date\_ 20141007  
 Time 15.11  
 INSTRUM spect  
 PROBHD 5 mm PABBI 1H/  
 PULPROG zgpg30  
 TD 30046  
 SOLVENT DMSO  
 NS 128  
 DS 8  
 SWH 25252.525 Hz  
 FIDRES 0.840462 Hz  
 AQ 0.5949108 sec  
 RG 1290  
 DW 19.800 usec  
 DE 6.50 usec  
 TE 298.0 K  
 D1 4.00000000 sec  
 D11 0.03000000 sec  
 TD0 1

==== CHANNEL f1 =====  
 NUC1 13C  
 P1 13.70 usec  
 PLW1 102.08999634 W  
 SFO1 100.6077418 MHz

==== CHANNEL f2 =====  
 CPDPRG[2] garp  
 NUC2 1H  
 PCPD2 90.00 usec  
 PLW2 6.30959988 W  
 PLW12 0.07789600 W  
 PLW13 0.06309600 W  
 SFO2 400.0718803 MHz

F2 - Processing parameters  
 SI 65536  
 SF 100.5976820 MHz  
 WDW EM  
 SSB 0  
 LB 0.30 Hz  
 GB 0  
 PC 1.00

— 24.96  
 — 12.87

1H NMR of 1a

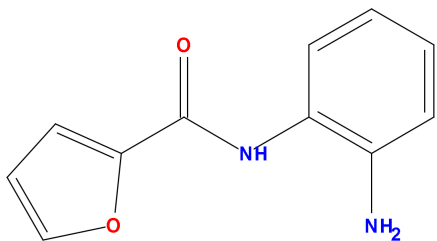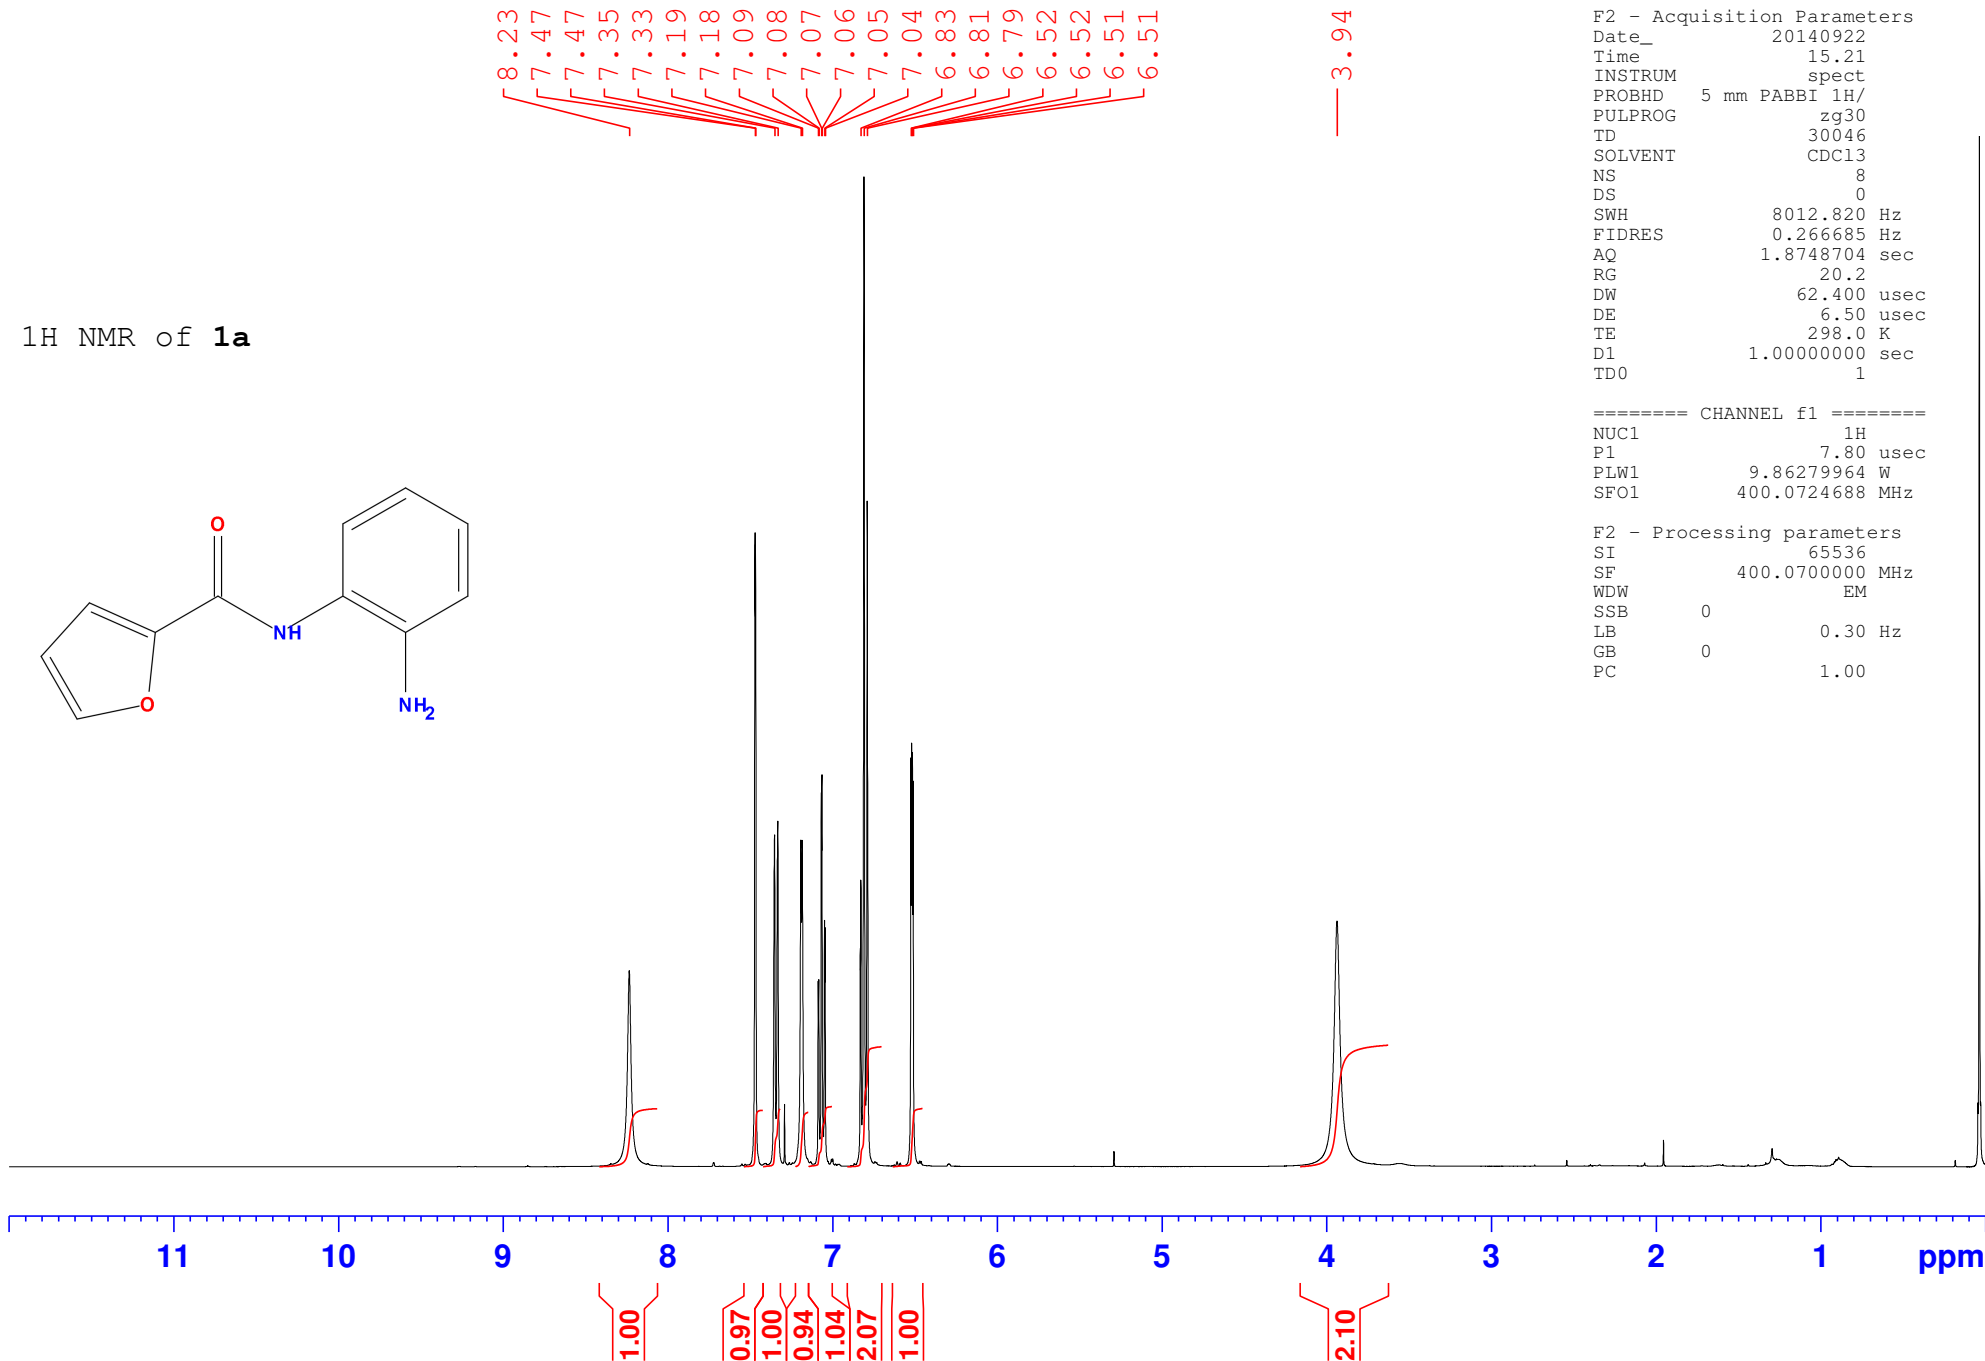

13C NMR of **1a**

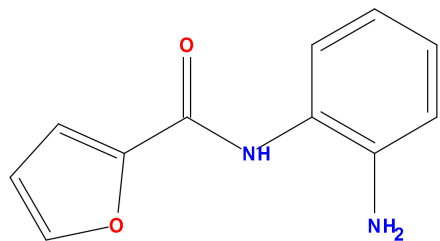

156.60  
 147.63  
 144.48  
 140.87  
 127.22  
 125.33  
 123.64  
 119.50  
 118.14  
 115.29  
 112.44

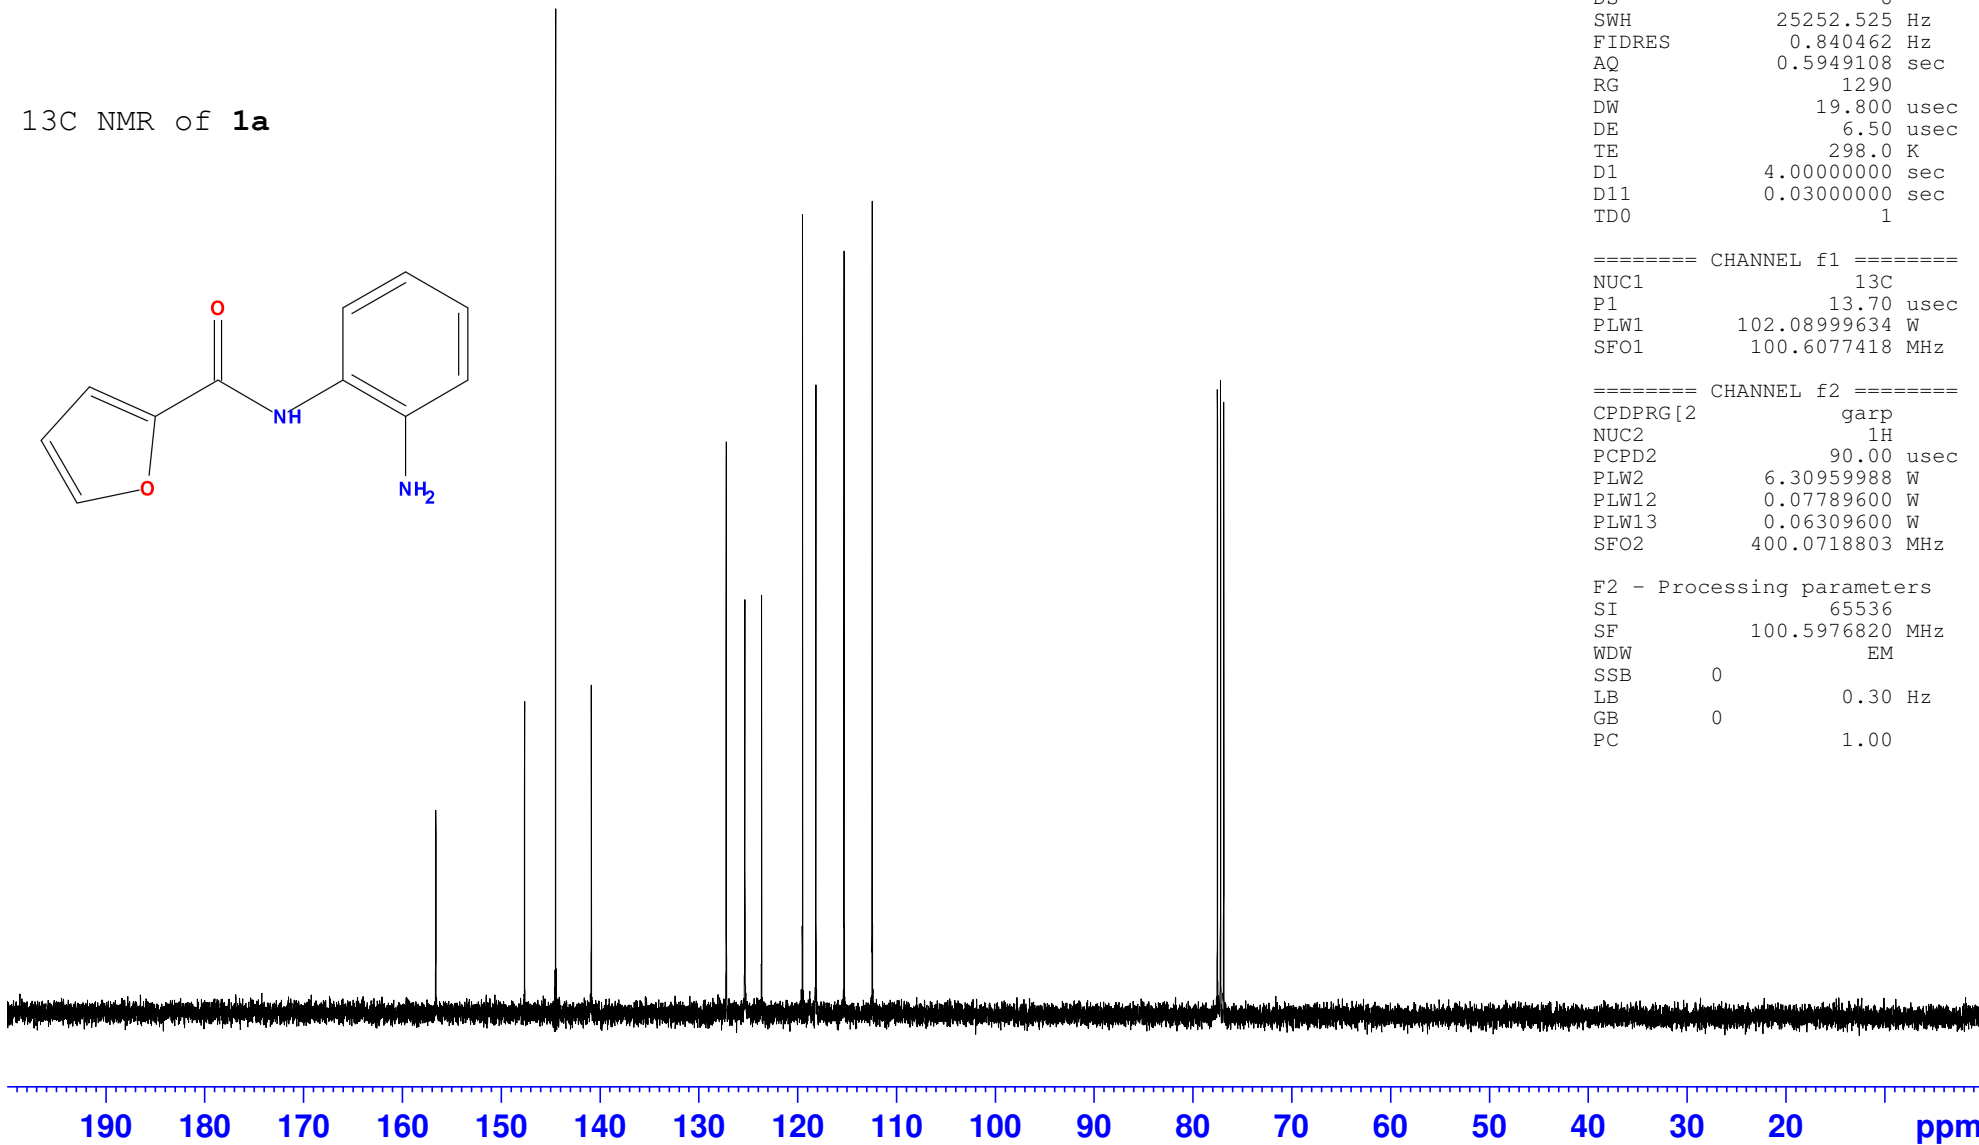

F2 - Acquisition Parameters  
 Date\_ 20140922  
 Time 15.37  
 INSTRUM spect  
 PROBHD 5 mm PABBI 1H/  
 PULPROG zgpg30  
 TD 30046  
 SOLVENT CDCl3  
 NS 128  
 DS 8  
 SWH 25252.525 Hz  
 FIDRES 0.840462 Hz  
 AQ 0.5949108 sec  
 RG 1290  
 DW 19.800 usec  
 DE 6.50 usec  
 TE 298.0 K  
 D1 4.00000000 sec  
 D11 0.03000000 sec  
 TD0 1

===== CHANNEL f1 =====  
 NUC1 13C  
 P1 13.70 usec  
 PLW1 102.08999634 W  
 SFO1 100.6077418 MHz

===== CHANNEL f2 =====  
 CPDPRG[2] garp  
 NUC2 1H  
 PCPD2 90.00 usec  
 PLW2 6.30959988 W  
 PLW12 0.07789600 W  
 PLW13 0.06309600 W  
 SFO2 400.0718803 MHz

F2 - Processing parameters  
 SI 65536  
 SF 100.5976820 MHz  
 WDW EM  
 SSB 0  
 LB 0.30 Hz  
 GB 0  
 PC 1.00



1H NMR of **1b**

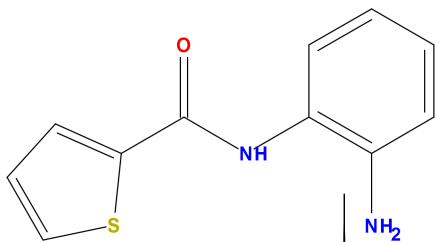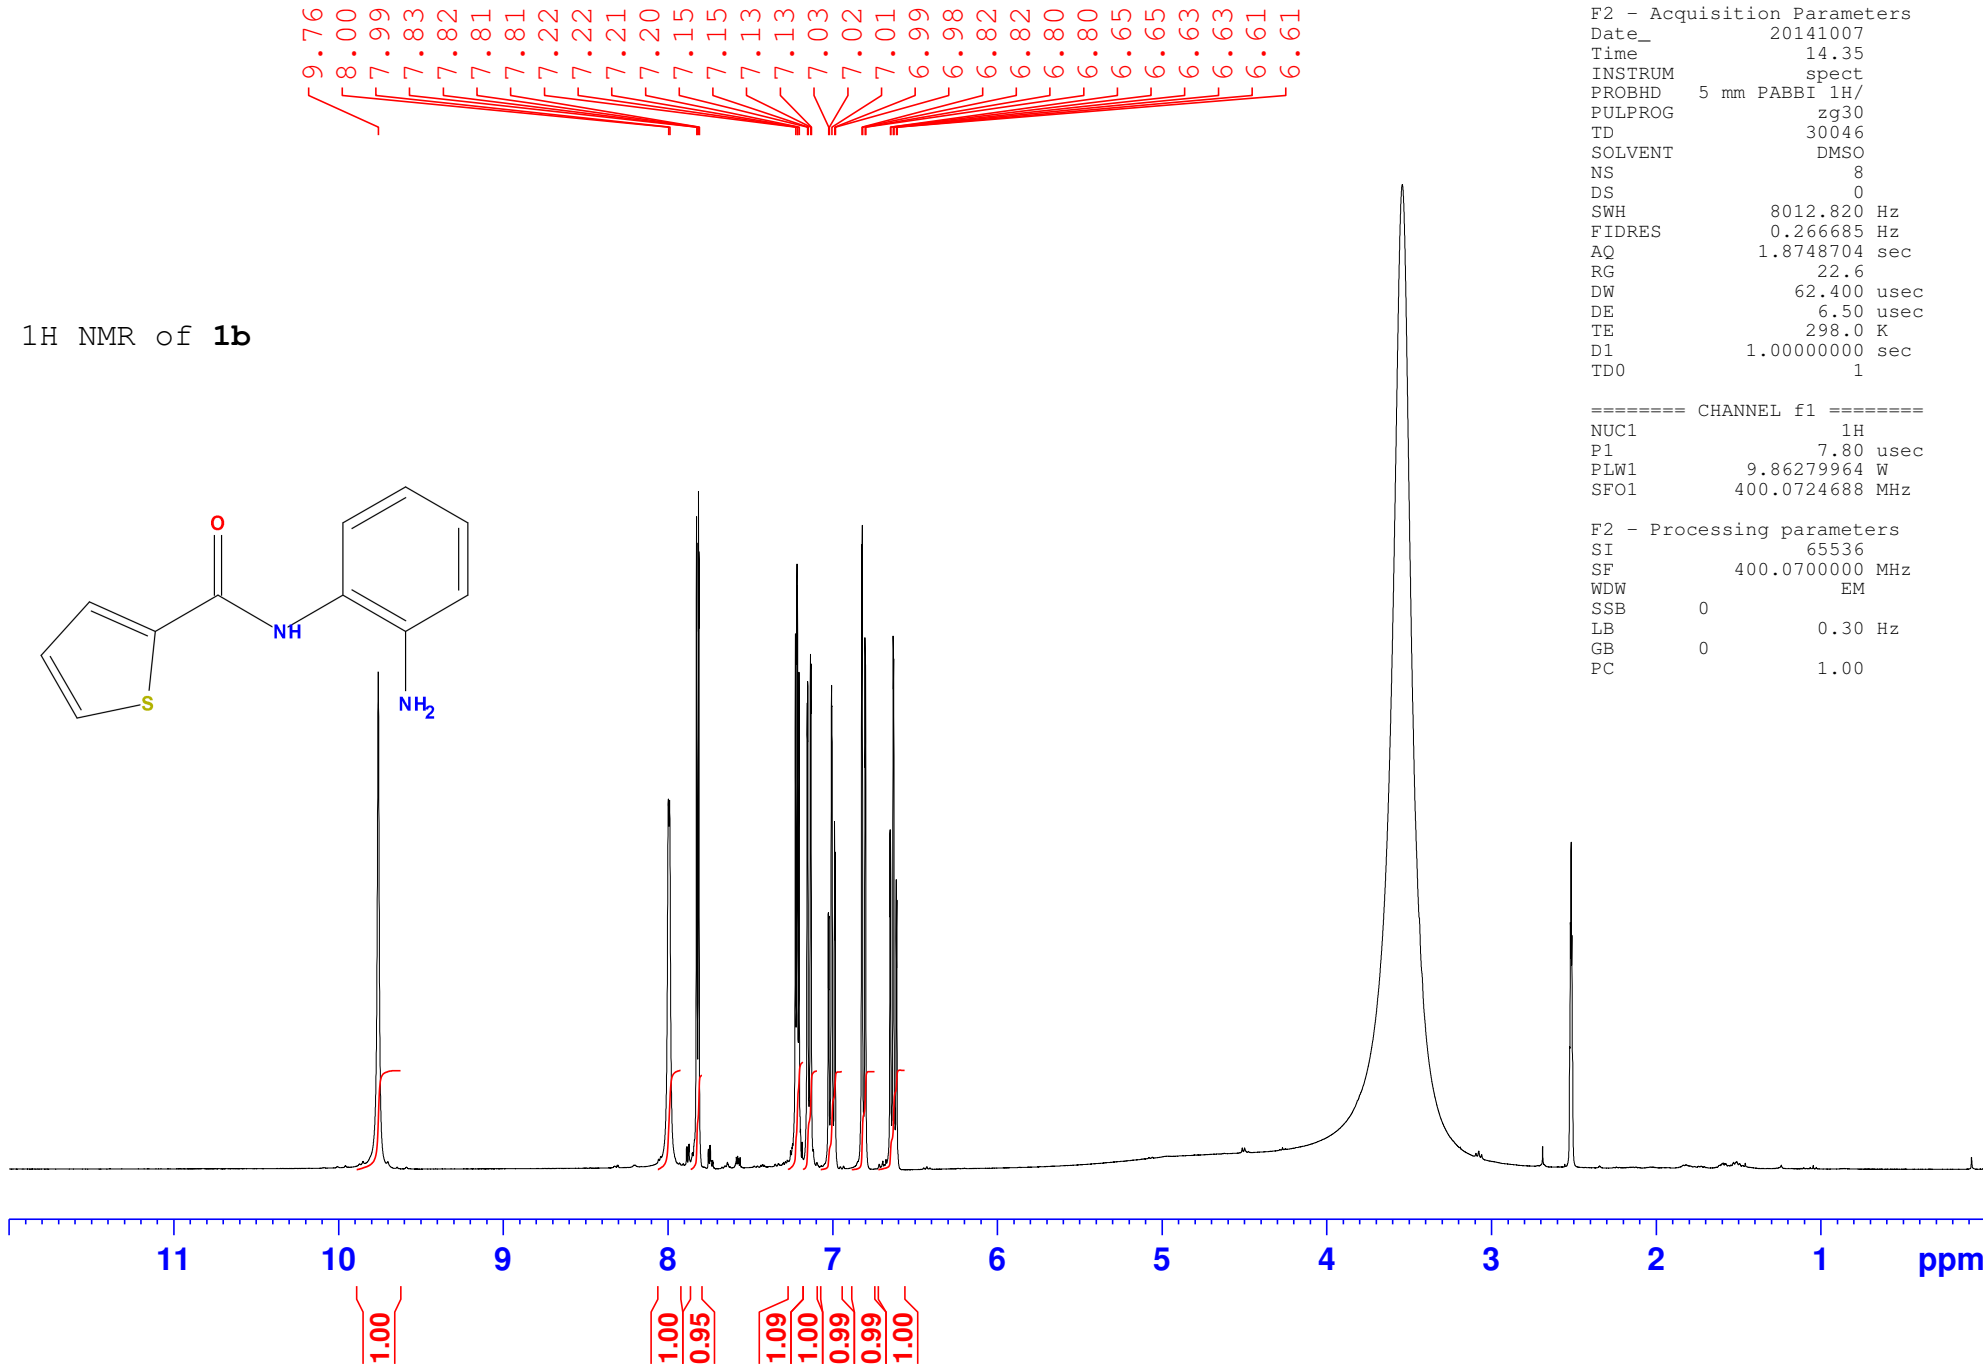

F2 - Acquisition Parameters  
 Date\_ 20141007  
 Time 14.35  
 INSTRUM spect  
 PROBHD 5 mm PABBI 1H/  
 PULPROG zg30  
 TD 30046  
 SOLVENT DMSO  
 NS 8  
 DS 0  
 SWH 8012.820 Hz  
 FIDRES 0.266685 Hz  
 AQ 1.8748704 sec  
 RG 22.6  
 DW 62.400 usec  
 DE 6.50 usec  
 TE 298.0 K  
 D1 1.00000000 sec  
 TD0 1

==== CHANNEL f1 =====  
 NUC1 1H  
 P1 7.80 usec  
 PLW1 9.86279964 W  
 SFO1 400.0724688 MHz

F2 - Processing parameters  
 SI 65536  
 SF 400.070000 MHz  
 WDW EM  
 SSB 0  
 LB 0.30 Hz  
 GB 0  
 PC 1.00

13C NMR of 1b

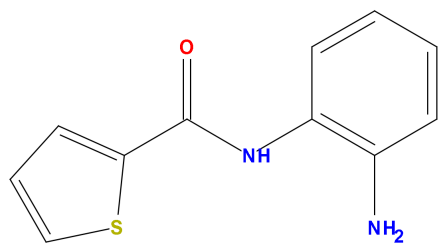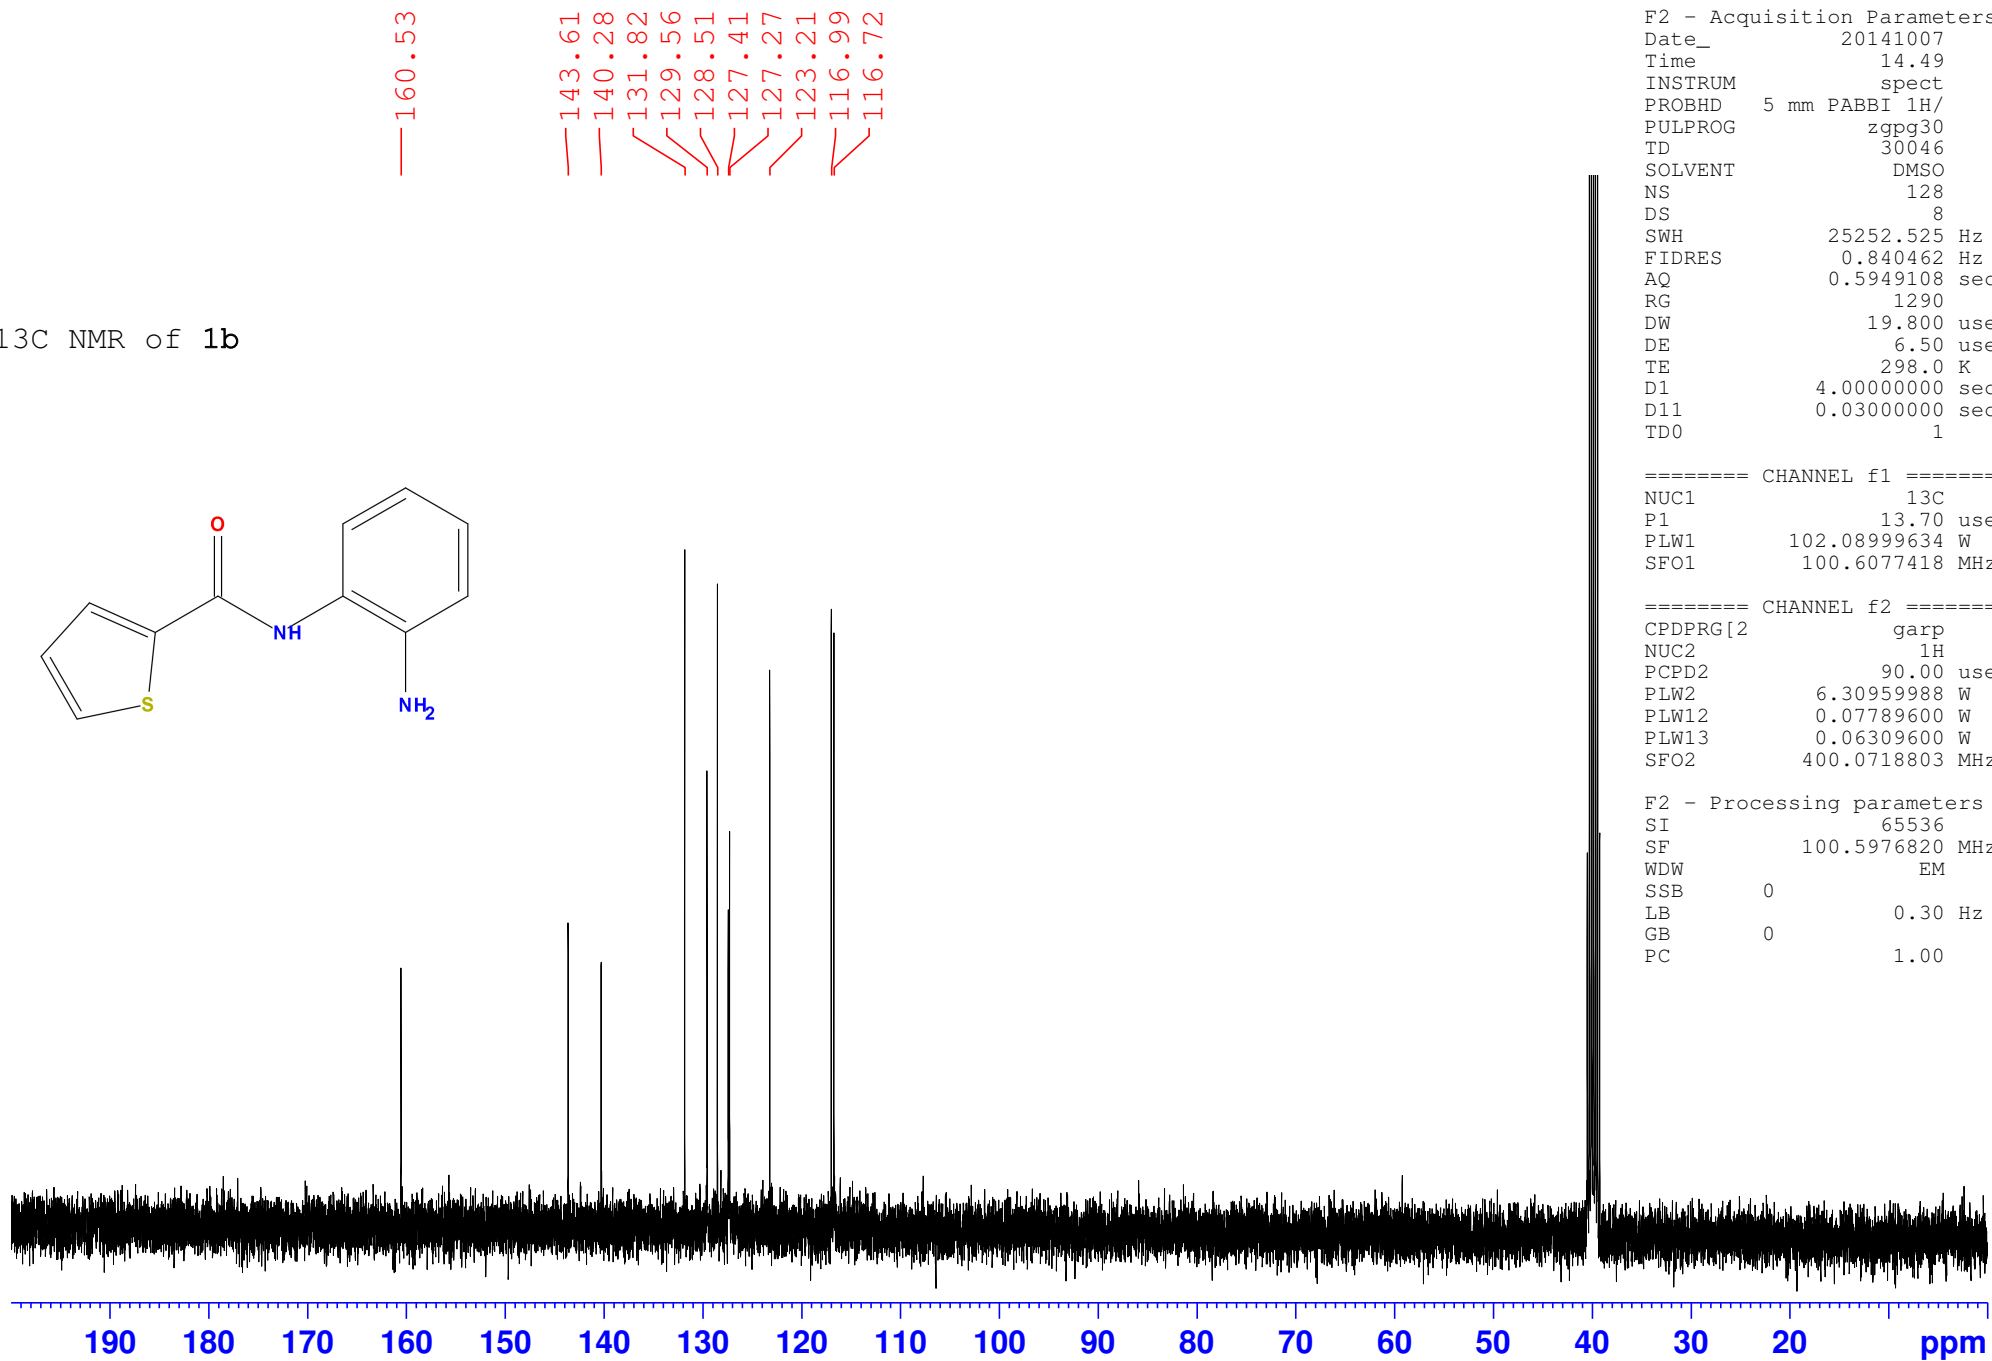

F2 - Acquisition Parameters  
Date\_ 20141007  
Time 14.49  
INSTRUM spect  
PROBHD 5 mm PABBI 1H/  
PULPROG zgpg30  
TD 30046  
SOLVENT DMSO  
NS 128  
DS 8  
SWH 25252.525 Hz  
FIDRES 0.840462 Hz  
AQ 0.5949108 sec  
RG 1290  
DW 19.800 usec  
DE 6.50 usec  
TE 298.0 K  
D1 4.00000000 sec  
D11 0.03000000 sec  
TD0 1

==== CHANNEL f1 =====  
NUC1 13C  
P1 13.70 usec  
PLW1 102.08999634 W  
SFO1 100.6077418 MHz

==== CHANNEL f2 =====  
CPDPRG[2] garp  
NUC2 1H  
PCPD2 90.00 usec  
PLW2 6.30959988 W  
PLW12 0.07789600 W  
PLW13 0.06309600 W  
SFO2 400.0718803 MHz

F2 - Processing parameters  
SI 65536  
SF 100.5976820 MHz  
WDW EM  
SSB 0  
LB 0.30 Hz  
GB 0  
PC 1.00

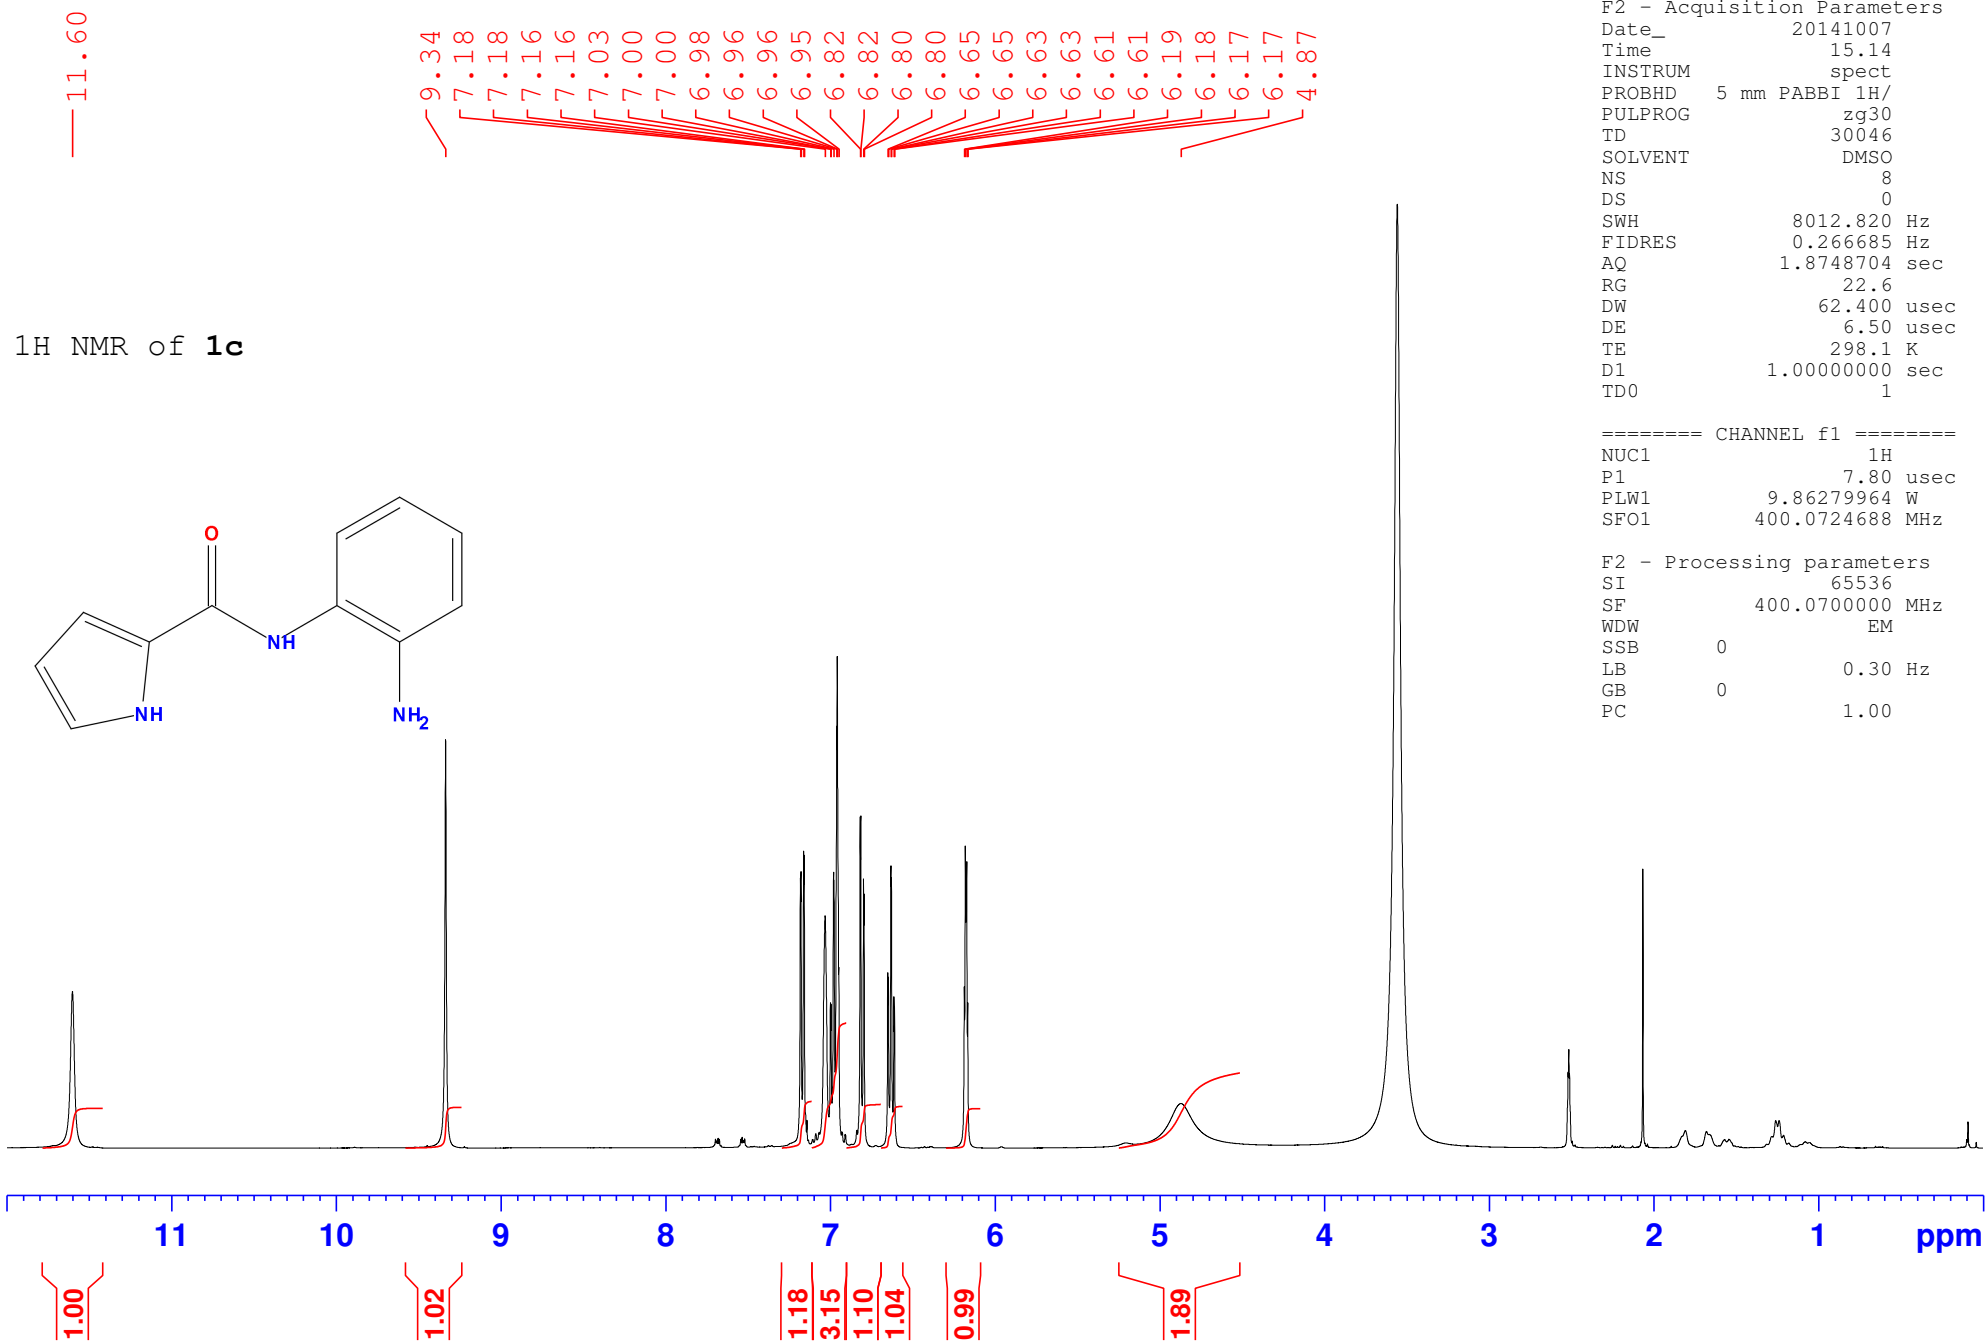

<sup>13</sup>C NMR of **1c**

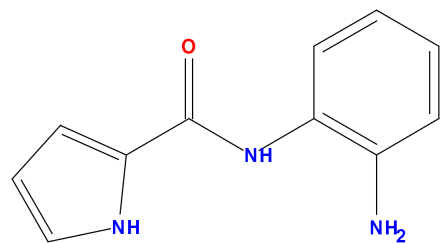

— 159.80

— 143.45

126.95  
126.67  
126.45  
123.88  
122.53  
117.00  
116.75  
111.76  
109.35

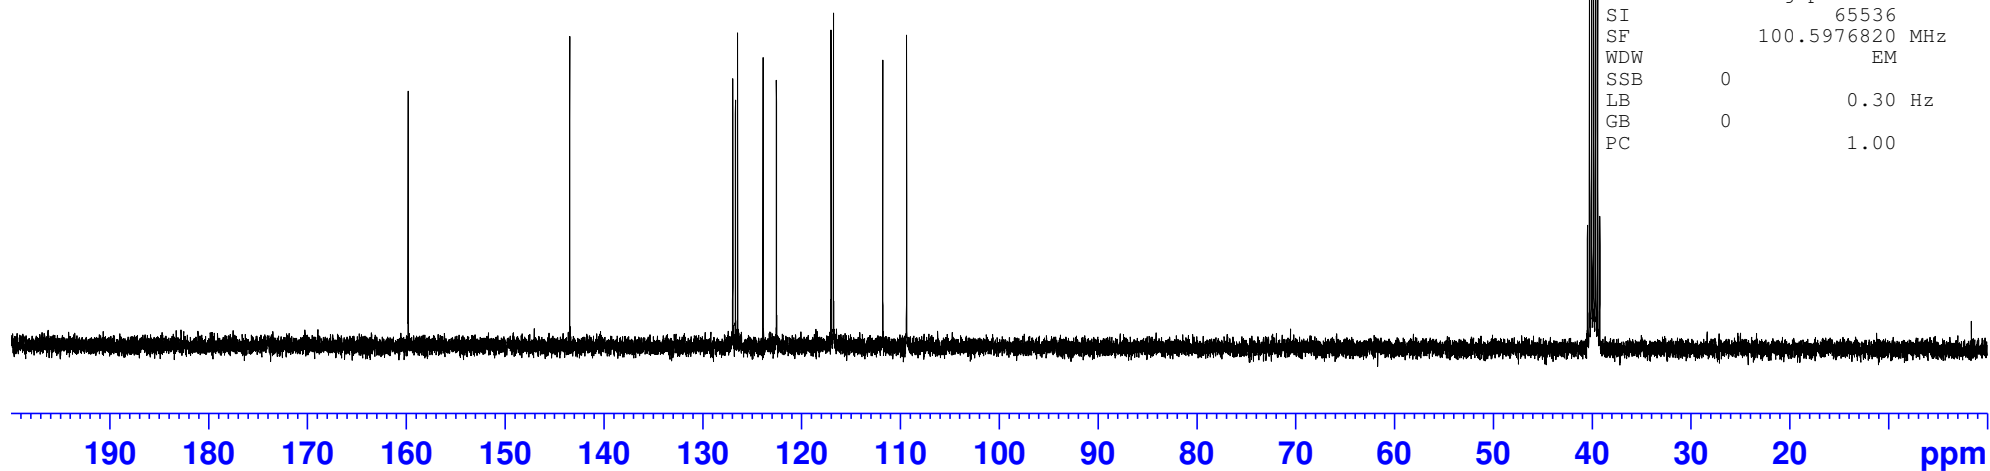

```
F2 - Acquisition Parameters
Date_      20141007
Time       15.28
INSTRUM    spect
PROBHD     5 mm PABBI 1H/
PULPROG    zgpg30
TD         30046
SOLVENT    DMSO
NS         128
DS         8
SWH        25252.525 Hz
FIDRES     0.840462 Hz
AQ         0.5949108 sec
RG         1290
DW         19.800 usec
DE         6.50 usec
TE         298.0 K
D1         4.00000000 sec
D11        0.03000000 sec
TD0        1
```

```
===== CHANNEL f1 =====
NUC1       13C
P1         13.70 usec
PLW1       102.08999634 W
SFO1       100.6077418 MHz
```

```
===== CHANNEL f2 =====
CPDPRG[2]  garp
NUC2       1H
PCPD2      90.00 usec
PLW2       6.30959988 W
PLW12      0.07789600 W
PLW13      0.06309600 W
SFO2       400.0718803 MHz
```

```
F2 - Processing parameters
SI         65536
SF         100.5976820 MHz
WDW        EM
SSB        0
LB         0.30 Hz
GB         0
PC         1.00
```

1H NMR of **1d**

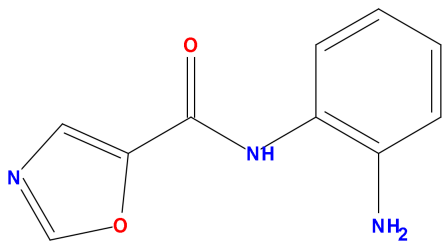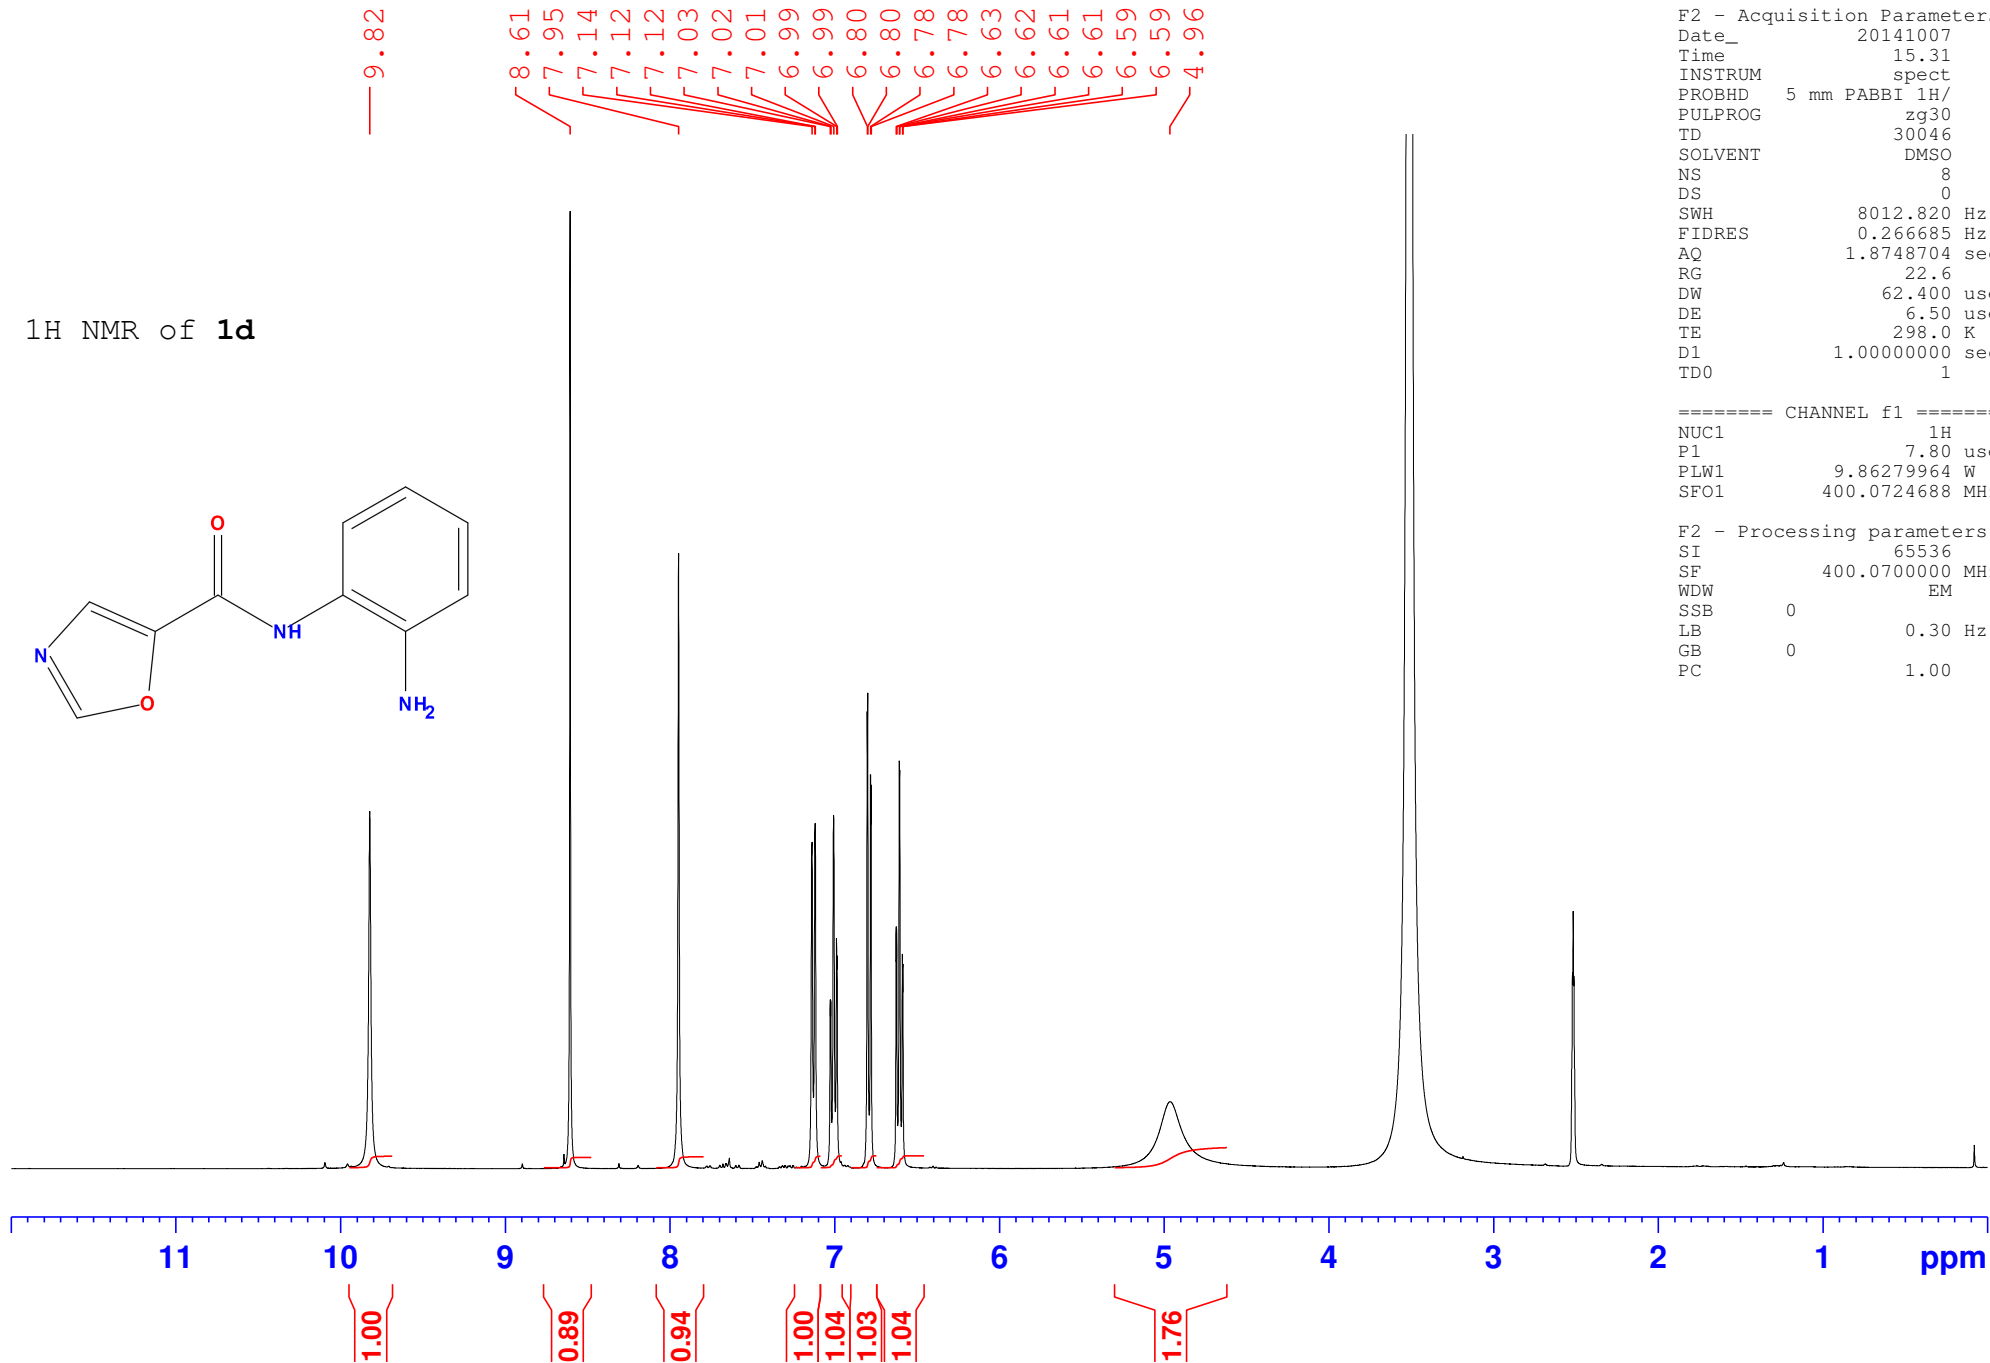

F2 - Acquisition Parameters  
 Date\_ 20141007  
 Time 15.31  
 INSTRUM spect  
 PROBHD 5 mm PABBI 1H/  
 PULPROG zg30  
 TD 30046  
 SOLVENT DMSO  
 NS 8  
 DS 0  
 SWH 8012.820 Hz  
 FIDRES 0.266685 Hz  
 AQ 1.8748704 sec  
 RG 22.6  
 DW 62.400 usec  
 DE 6.50 usec  
 TE 298.0 K  
 D1 1.00000000 sec  
 TD0 1

===== CHANNEL f1 =====  
 NUC1 1H  
 P1 7.80 usec  
 PLW1 9.86279964 W  
 SFO1 400.0724688 MHz

F2 - Processing parameters  
 SI 65536  
 SF 400.0700000 MHz  
 WDW EM  
 SSB 0  
 LB 0.30 Hz  
 GB 0  
 PC 1.00

<sup>13</sup>C NMR of **1d**

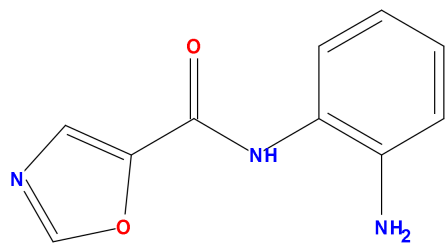

<sup>13</sup>C NMR peak list (ppm):  
 155.79  
 153.97  
 145.88  
 143.86  
 130.14  
 127.58  
 127.46  
 122.05  
 116.72  
 116.51

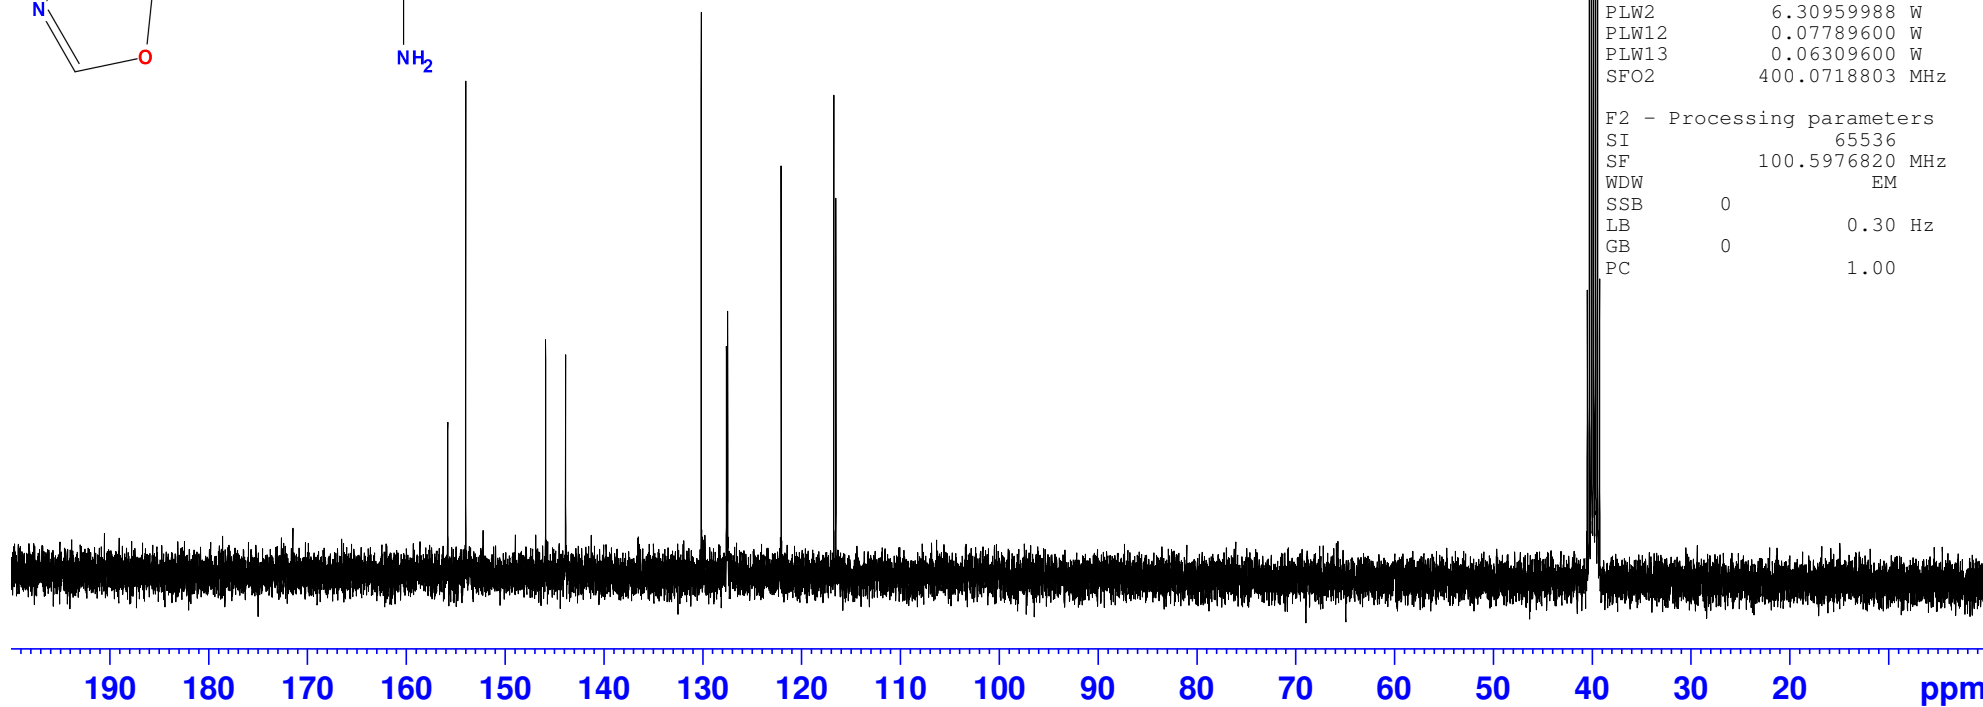

F2 - Acquisition Parameters

|         |                |
|---------|----------------|
| Date_   | 20141007       |
| Time    | 15.45          |
| INSTRUM | spect          |
| PROBHD  | 5 mm PABBI 1H/ |
| PULPROG | zgpg30         |
| TD      | 30046          |
| SOLVENT | DMSO           |
| NS      | 128            |
| DS      | 8              |
| SWH     | 25252.525 Hz   |
| FIDRES  | 0.840462 Hz    |
| AQ      | 0.5949108 sec  |
| RG      | 1290           |
| DW      | 19.800 usec    |
| DE      | 6.50 usec      |
| TE      | 298.0 K        |
| D1      | 4.00000000 sec |
| D11     | 0.03000000 sec |
| TD0     | 1              |

==== CHANNEL f1 =====

|      |                 |
|------|-----------------|
| NUC1 | 13C             |
| P1   | 13.70 usec      |
| PLW1 | 102.08999634 W  |
| SFO1 | 100.6077418 MHz |

==== CHANNEL f2 =====

|           |                 |
|-----------|-----------------|
| CPDPRG[2] | garp            |
| NUC2      | 1H              |
| PCPD2     | 90.00 usec      |
| PLW2      | 6.30959988 W    |
| PLW12     | 0.07789600 W    |
| PLW13     | 0.06309600 W    |
| SFO2      | 400.0718803 MHz |

F2 - Processing parameters

|     |                 |
|-----|-----------------|
| SI  | 65536           |
| SF  | 100.5976820 MHz |
| WDW | EM              |
| SSB | 0               |
| LB  | 0.30 Hz         |
| GB  | 0               |
| PC  | 1.00            |

1H NMR of **1e**

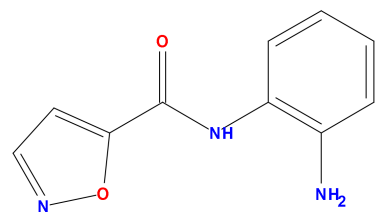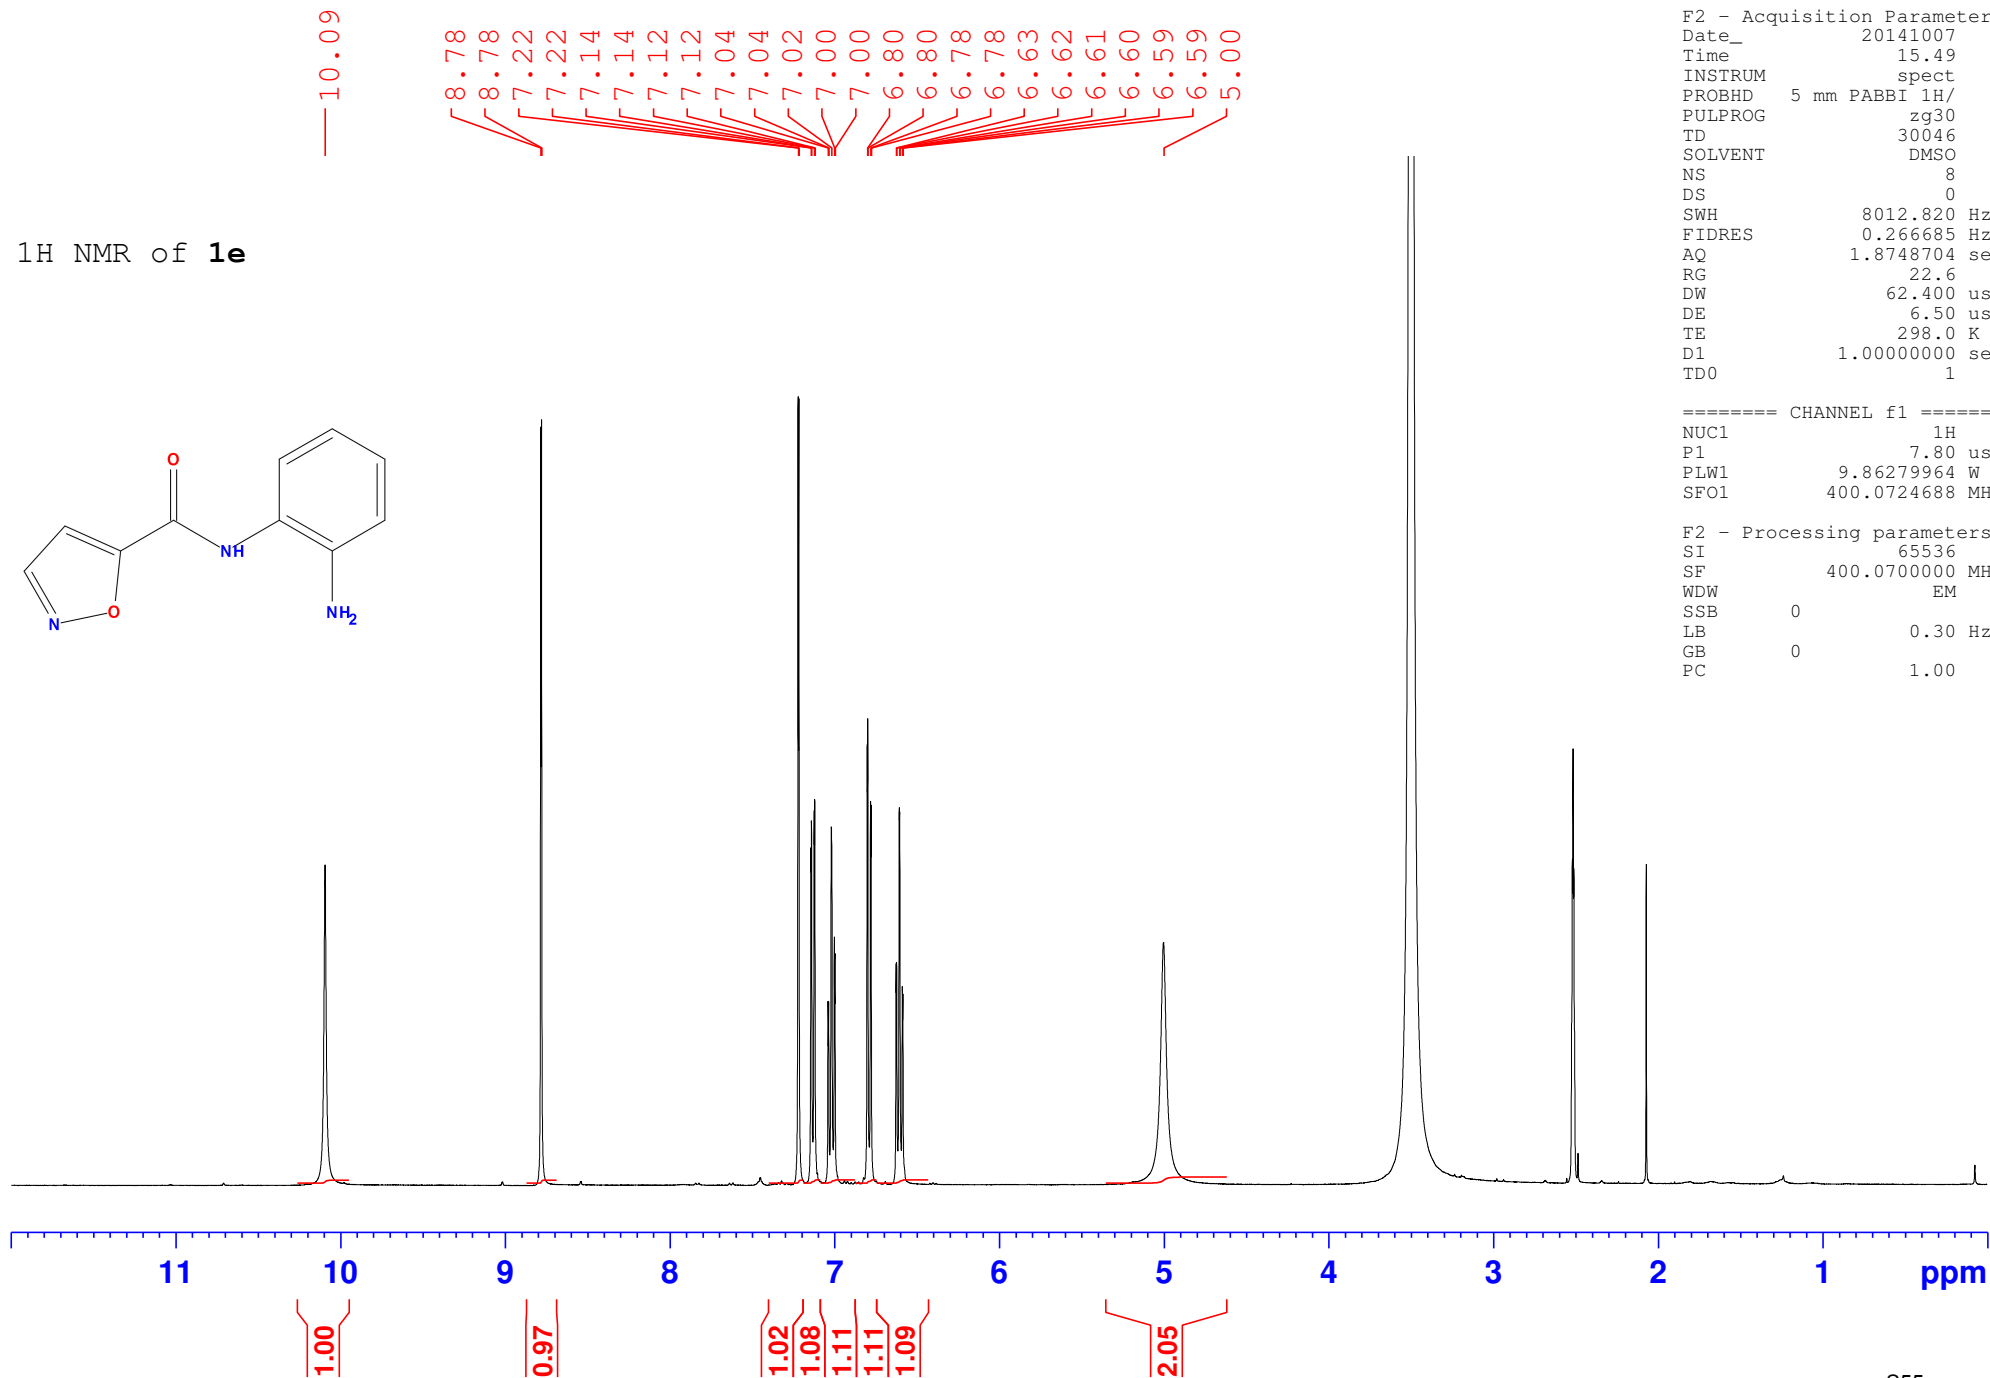

F2 - Acquisition Parameters  
 Date\_ 20141007  
 Time 15.49  
 INSTRUM spect  
 PROBHD 5 mm PABBI 1H/  
 PULPROG zg30  
 TD 30046  
 SOLVENT DMSO  
 NS 8  
 DS 0  
 SWH 8012.820 Hz  
 FIDRES 0.266685 Hz  
 AQ 1.8748704 sec  
 RG 22.6  
 DW 62.400 usec  
 DE 6.50 usec  
 TE 298.0 K  
 D1 1.00000000 sec  
 TD0 1

==== CHANNEL f1 =====  
 NUC1 1H  
 P1 7.80 usec  
 PLW1 9.86279964 W  
 SFO1 400.0724688 MHz

F2 - Processing parameters  
 SI 65536  
 SF 400.0700000 MHz  
 WDW EM  
 SSB 0  
 LB 0.30 Hz  
 GB 0  
 PC 1.00

<sup>13</sup>C NMR of **1e**

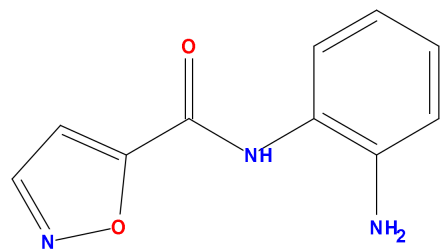

— 163.26  
— 154.95  
— 152.16  
— 143.98  
127.85  
127.54  
— 121.68  
116.63  
116.49  
— 106.88

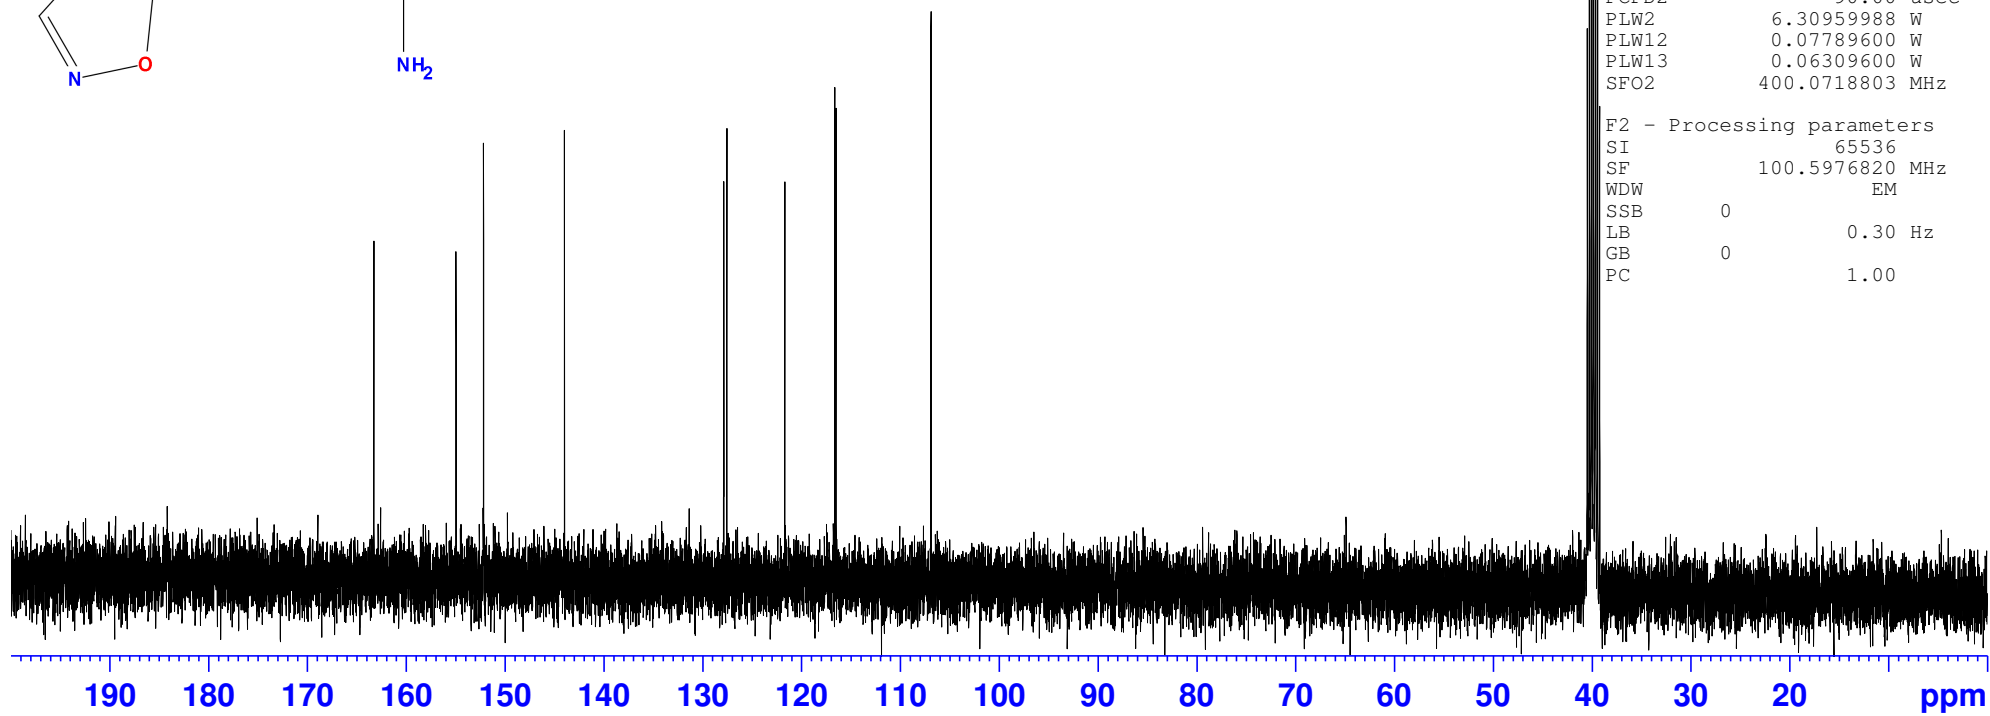

F2 - Acquisition Parameters  
Date\_ 20141007  
Time 16.04  
INSTRUM spect  
PROBHD 5 mm PABBI 1H/  
PULPROG zgpg30  
TD 30046  
SOLVENT DMSO  
NS 128  
DS 8  
SWH 25252.525 Hz  
FIDRES 0.840462 Hz  
AQ 0.5949108 sec  
RG 1290  
DW 19.800 usec  
DE 6.50 usec  
TE 298.0 K  
D1 4.0000000 sec  
D11 0.03000000 sec  
TD0 1

==== CHANNEL f1 =====  
NUC1 13C  
P1 13.70 usec  
PLW1 102.08999634 W  
SFO1 100.6077418 MHz

==== CHANNEL f2 =====  
CPDPRG[2] garp  
NUC2 1H  
PCPD2 90.00 usec  
PLW2 6.30959988 W  
PLW12 0.07789600 W  
PLW13 0.06309600 W  
SFO2 400.0718803 MHz

F2 - Processing parameters  
SI 65536  
SF 100.5976820 MHz  
WDW EM  
SSB 0  
LB 0.30 Hz  
GB 0  
PC 1.00



1H NMR of **1f**

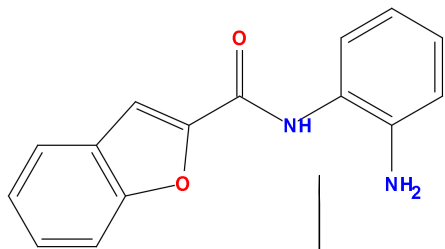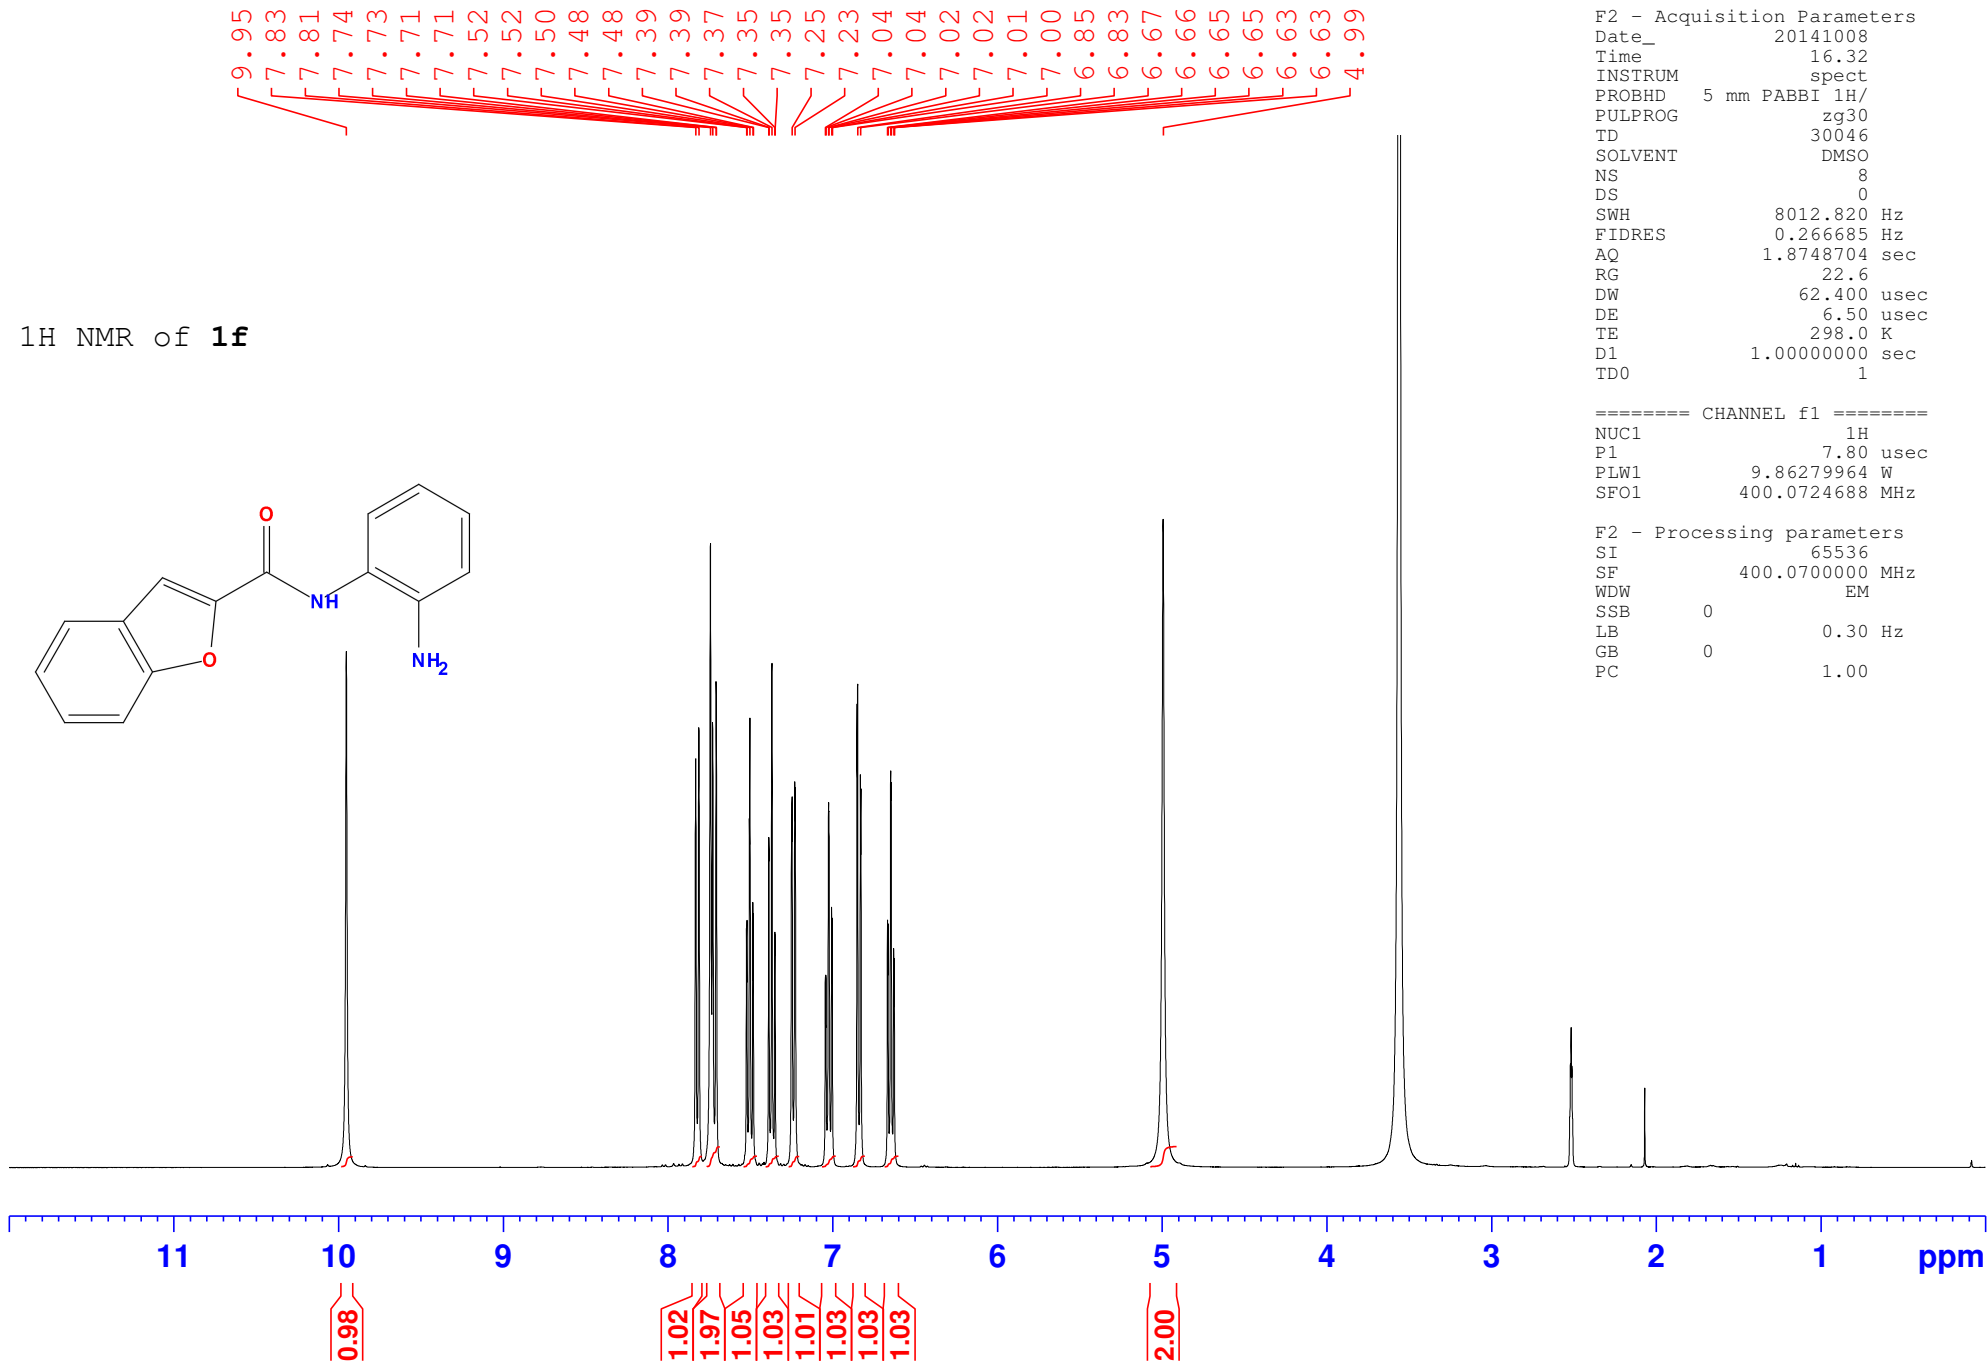

F2 - Acquisition Parameters  
 Date\_ 20141008  
 Time 16.32  
 INSTRUM spect  
 PROBHD 5 mm PABBI 1H/  
 PULPROG zg30  
 TD 30046  
 SOLVENT DMSO  
 NS 8  
 DS 0  
 SWH 8012.820 Hz  
 FIDRES 0.266685 Hz  
 AQ 1.8748704 sec  
 RG 22.6  
 DW 62.400 usec  
 DE 6.50 usec  
 TE 298.0 K  
 D1 1.00000000 sec  
 TD0 1

===== CHANNEL f1 =====  
 NUC1 1H  
 P1 7.80 usec  
 PLW1 9.86279964 W  
 SFO1 400.0724688 MHz

F2 - Processing parameters  
 SI 65536  
 SF 400.0700000 MHz  
 WDW EM  
 SSB 0  
 LB 0.30 Hz  
 GB 0  
 PC 1.00

<sup>13</sup>C NMR of **1f**

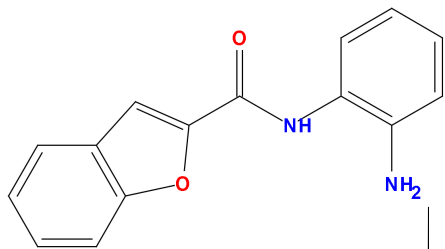

157.46  
154.85  
149.45  
143.66  
127.66  
127.46  
127.40  
127.21  
124.26  
123.30  
122.72  
116.92  
116.75  
112.37  
110.72

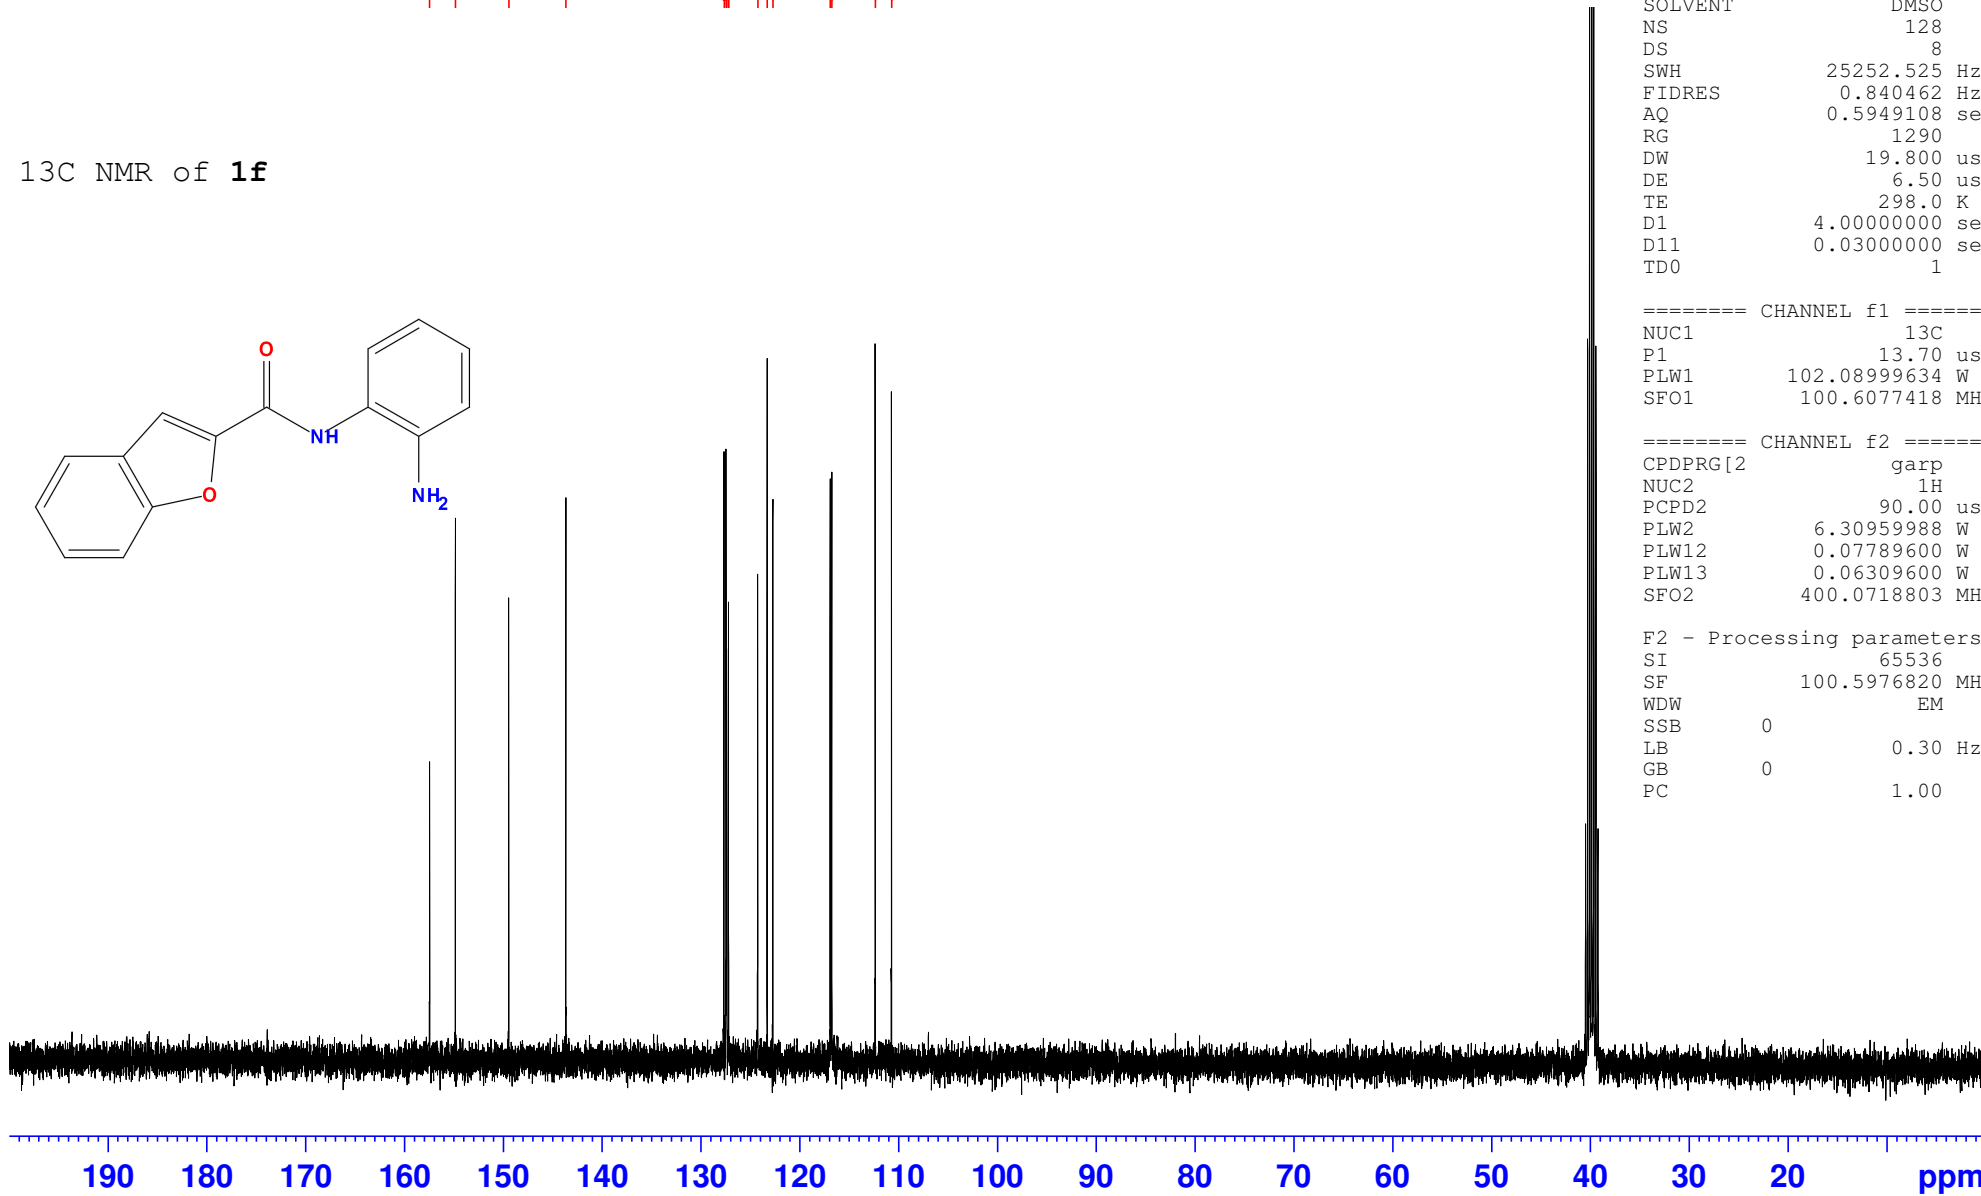

F2 - Acquisition Parameters  
Date\_ 20141008  
Time 16.45  
INSTRUM spect  
PROBHD 5 mm PABBI 1H/  
PULPROG zgpg30  
TD 30046  
SOLVENT DMSO  
NS 128  
DS 8  
SWH 25252.525 Hz  
FIDRES 0.840462 Hz  
AQ 0.5949108 sec  
RG 1290  
DW 19.800 usec  
DE 6.50 usec  
TE 298.0 K  
D1 4.00000000 sec  
D11 0.03000000 sec  
TD0 1

=====  
CHANNEL f1  
NUC1 13C  
P1 13.70 usec  
PLW1 102.08999634 W  
SFO1 100.6077418 MHz

=====  
CHANNEL f2  
CPDPRG[2] garp  
NUC2 1H  
PCPD2 90.00 usec  
PLW2 6.30959988 W  
PLW12 0.07789600 W  
PLW13 0.06309600 W  
SFO2 400.0718803 MHz

F2 - Processing parameters  
SI 65536  
SF 100.5976820 MHz  
WDW EM  
SSB 0  
LB 0.30 Hz  
GB 0  
PC 1.00

1H NMR of 2

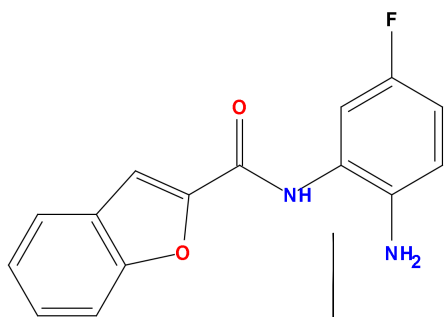

9.88  
7.83  
7.81  
7.74  
7.72  
7.70  
7.52  
7.52  
7.50  
7.48  
7.48  
7.39  
7.39  
7.37  
7.35  
7.35  
7.20  
7.18  
7.18  
7.16  
6.62  
6.61  
6.59  
6.58  
6.43  
6.42  
6.40  
6.40  
6.38  
6.38  
5.35

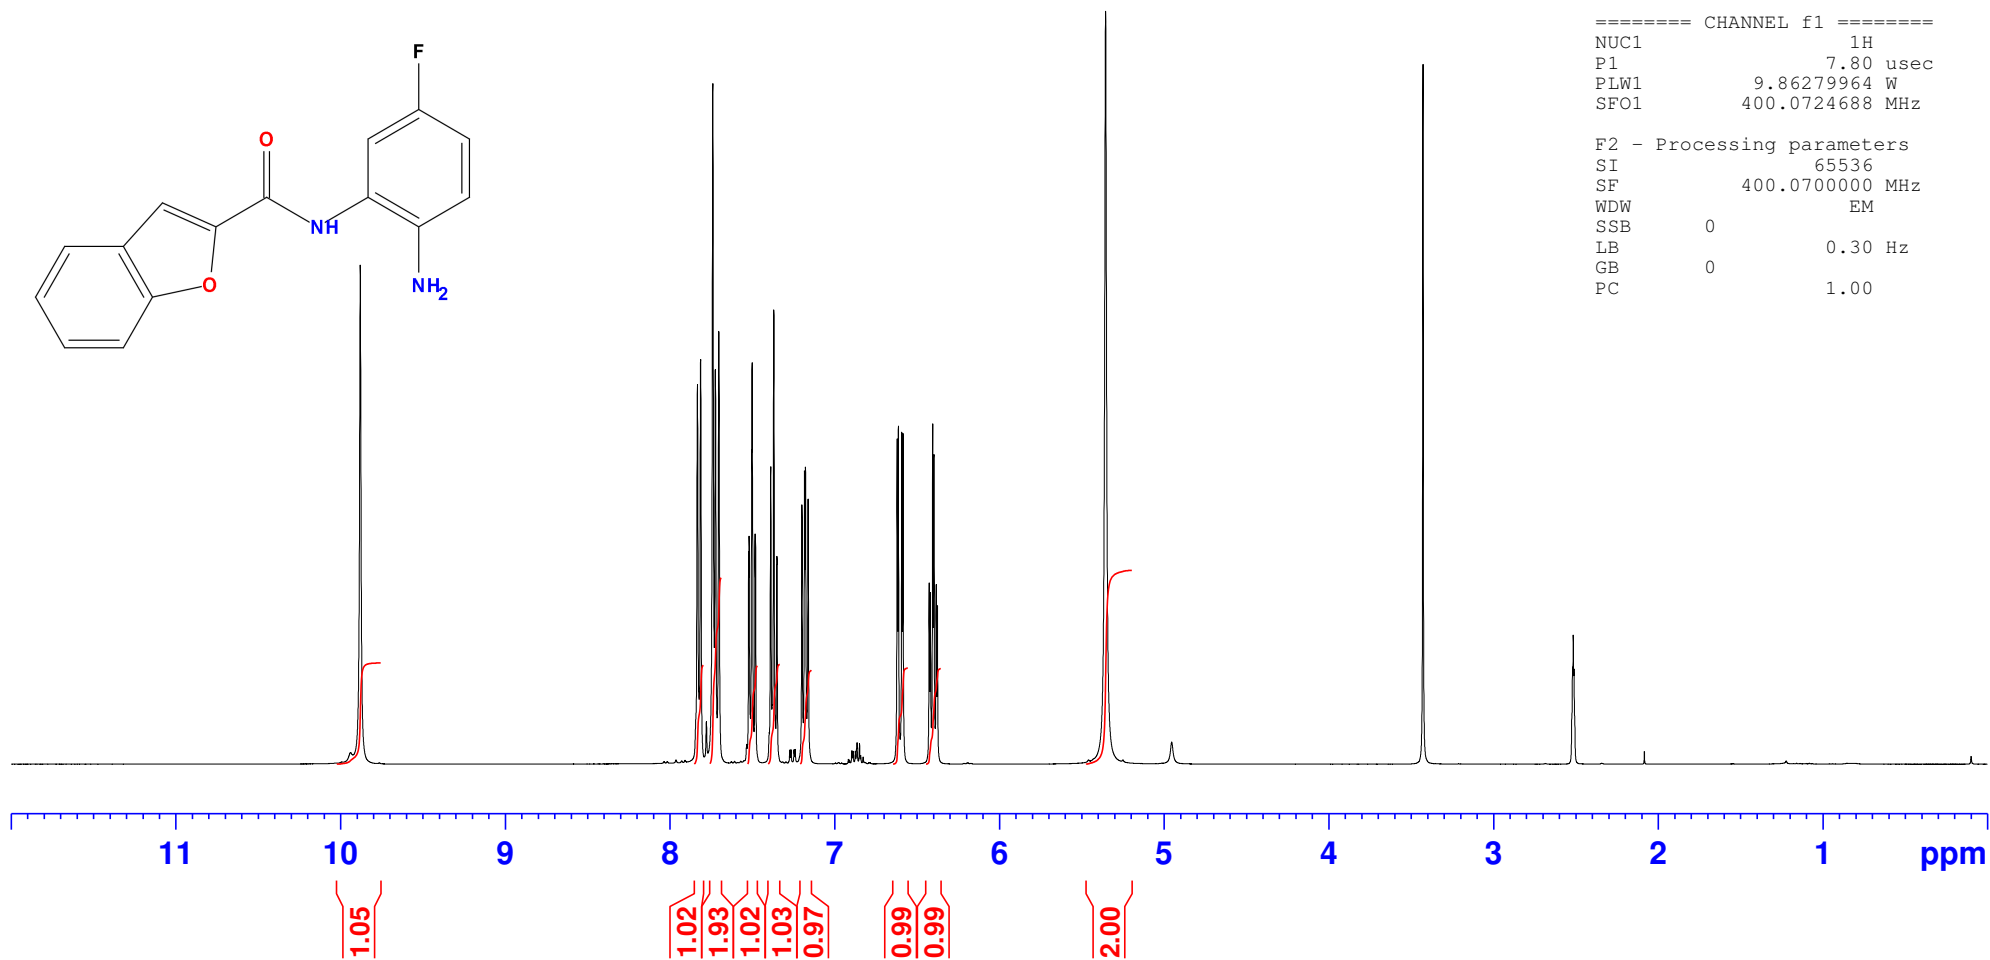

F2 - Acquisition Parameters  
Date\_ 20150226  
Time 16.55  
INSTRUM spect  
PROBHD 5 mm PABBI 1H/  
PULPROG zg30  
TD 30046  
SOLVENT DMSO  
NS 8  
DS 0  
SWH 8012.820 Hz  
FIDRES 0.266685 Hz  
AQ 1.8748704 sec  
RG 22.6  
DW 62.400 usec  
DE 6.50 usec  
TE 298.0 K  
D1 1.00000000 sec  
TD0 1

==== CHANNEL f1 =====  
NUC1 1H  
P1 7.80 usec  
PLW1 9.86279964 W  
SFO1 400.0724688 MHz

F2 - Processing parameters  
SI 65536  
SF 400.0700000 MHz  
WDW EM  
SSB 0  
LB 0.30 Hz  
GB 0  
PC 1.00

162.97  
160.59  
157.76  
154.83  
149.51  
146.23  
146.11  
129.25  
129.15  
127.67  
127.39  
123.27  
118.62  
112.33  
110.63  
102.71  
102.48  
102.12  
101.87

F2 - Acquisition Parameters  
Date\_ 20150226  
Time 17.19  
INSTRUM spect  
PROBHD 5 mm PABBI 1H/  
PULPROG zgpg30  
TD 30046  
SOLVENT DMSO  
NS 256  
DS 8  
SWH 25252.525 Hz  
FIDRES 0.840462 Hz  
AQ 0.5949108 sec  
RG 1290  
DW 19.800 usec  
DE 6.50 usec  
TE 298.0 K  
D1 4.00000000 sec  
D11 0.03000000 sec  
TD0 1

13C NMR of 2

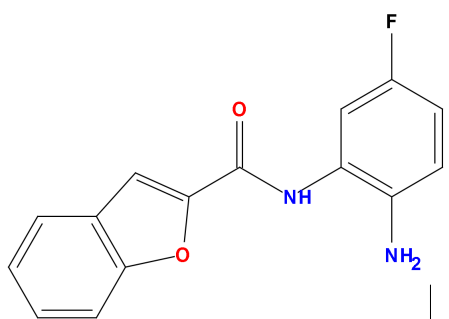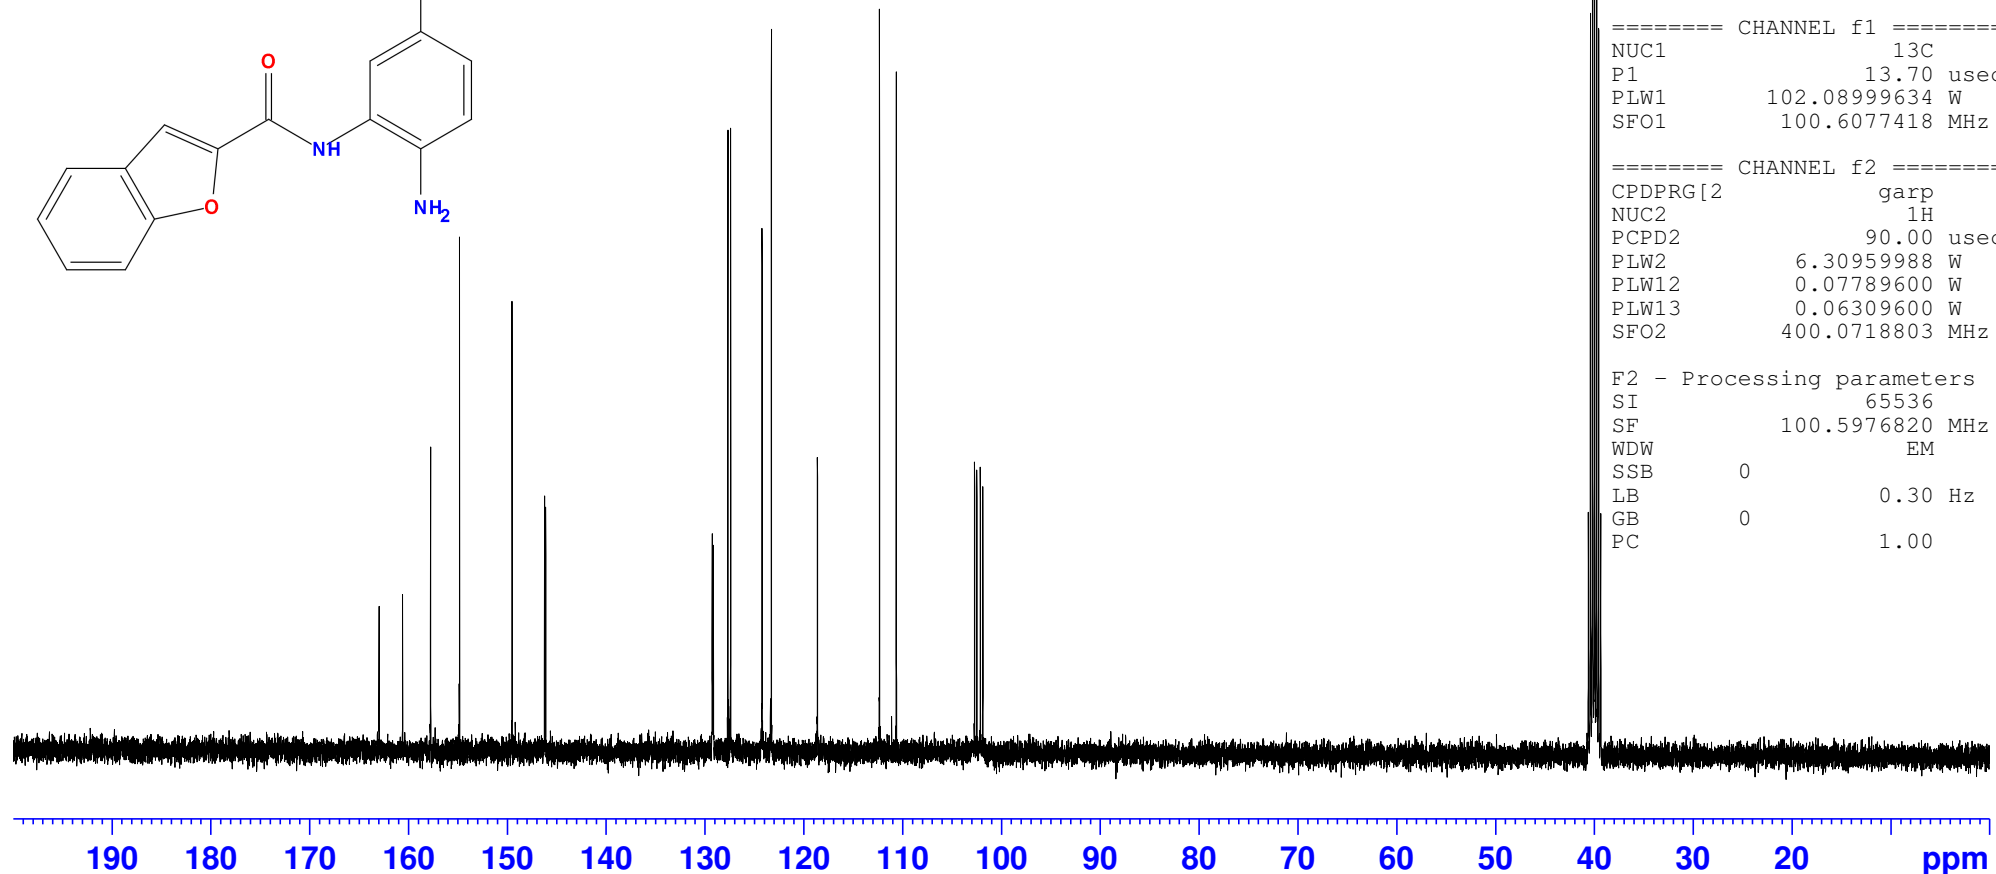

==== CHANNEL f1 =====  
NUC1 13C  
P1 13.70 usec  
PLW1 102.0899634 W  
SFO1 100.6077418 MHz  
==== CHANNEL f2 =====  
CPDPRG[2] garp  
NUC2 1H  
PCPD2 90.00 usec  
PLW2 6.30959988 W  
PLW12 0.07789600 W  
PLW13 0.06309600 W  
SFO2 400.0718803 MHz  
F2 - Processing parameters  
SI 65536  
SF 100.5976820 MHz  
WDW EM  
SSB 0  
LB 0.30 Hz  
GB 0  
PC 1.00

<sup>19</sup>F NMR of **2**

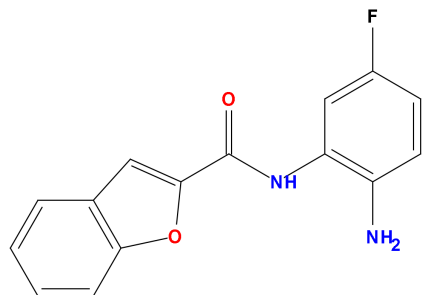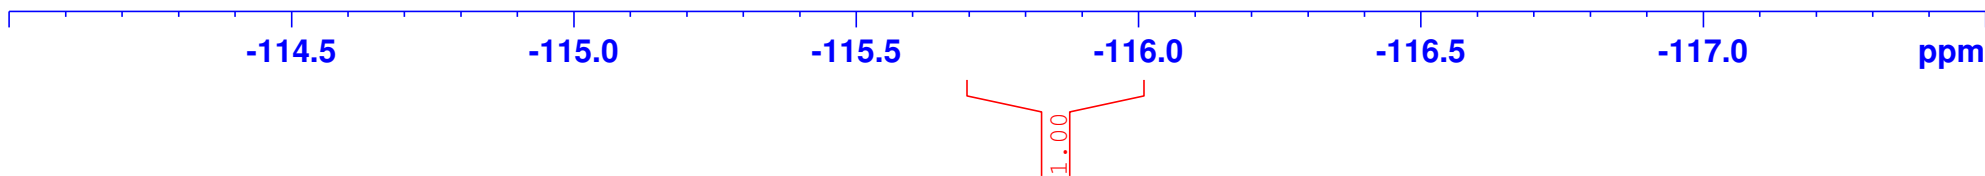

F2 - Acquisition Parameters  
Date\_ 20150414  
Time 10.34  
INSTRUM spect  
PROBHD 5 mm PABBI 1H/  
PULPROG zg  
TD 32768  
SOLVENT DMSO  
NS 16  
DS 0  
SWH 15000.000 Hz  
FIDRES 0.457764 Hz  
AQ 1.0922667 sec  
RG 256  
DW 33.333 usec  
DE 6.50 usec  
TE 298.0 K  
D1 2.00000000 sec  
TD0 1

==== CHANNEL f1 =====  
NUC1 19F  
P1 18.50 usec  
PLW1 2.51188588 W  
SFO1 376.3967370 MHz

F2 - Processing parameters  
SI 16384  
SF 376.4419100 MHz  
WDW EM  
SSB 0  
LB 2.00 Hz  
GB 0  
PC 1.00

1H NMR of 2a

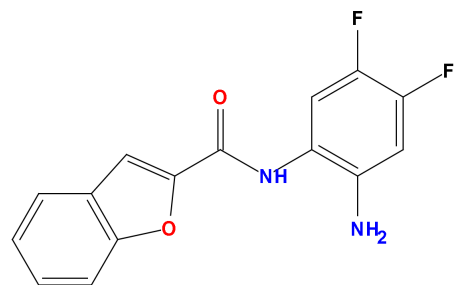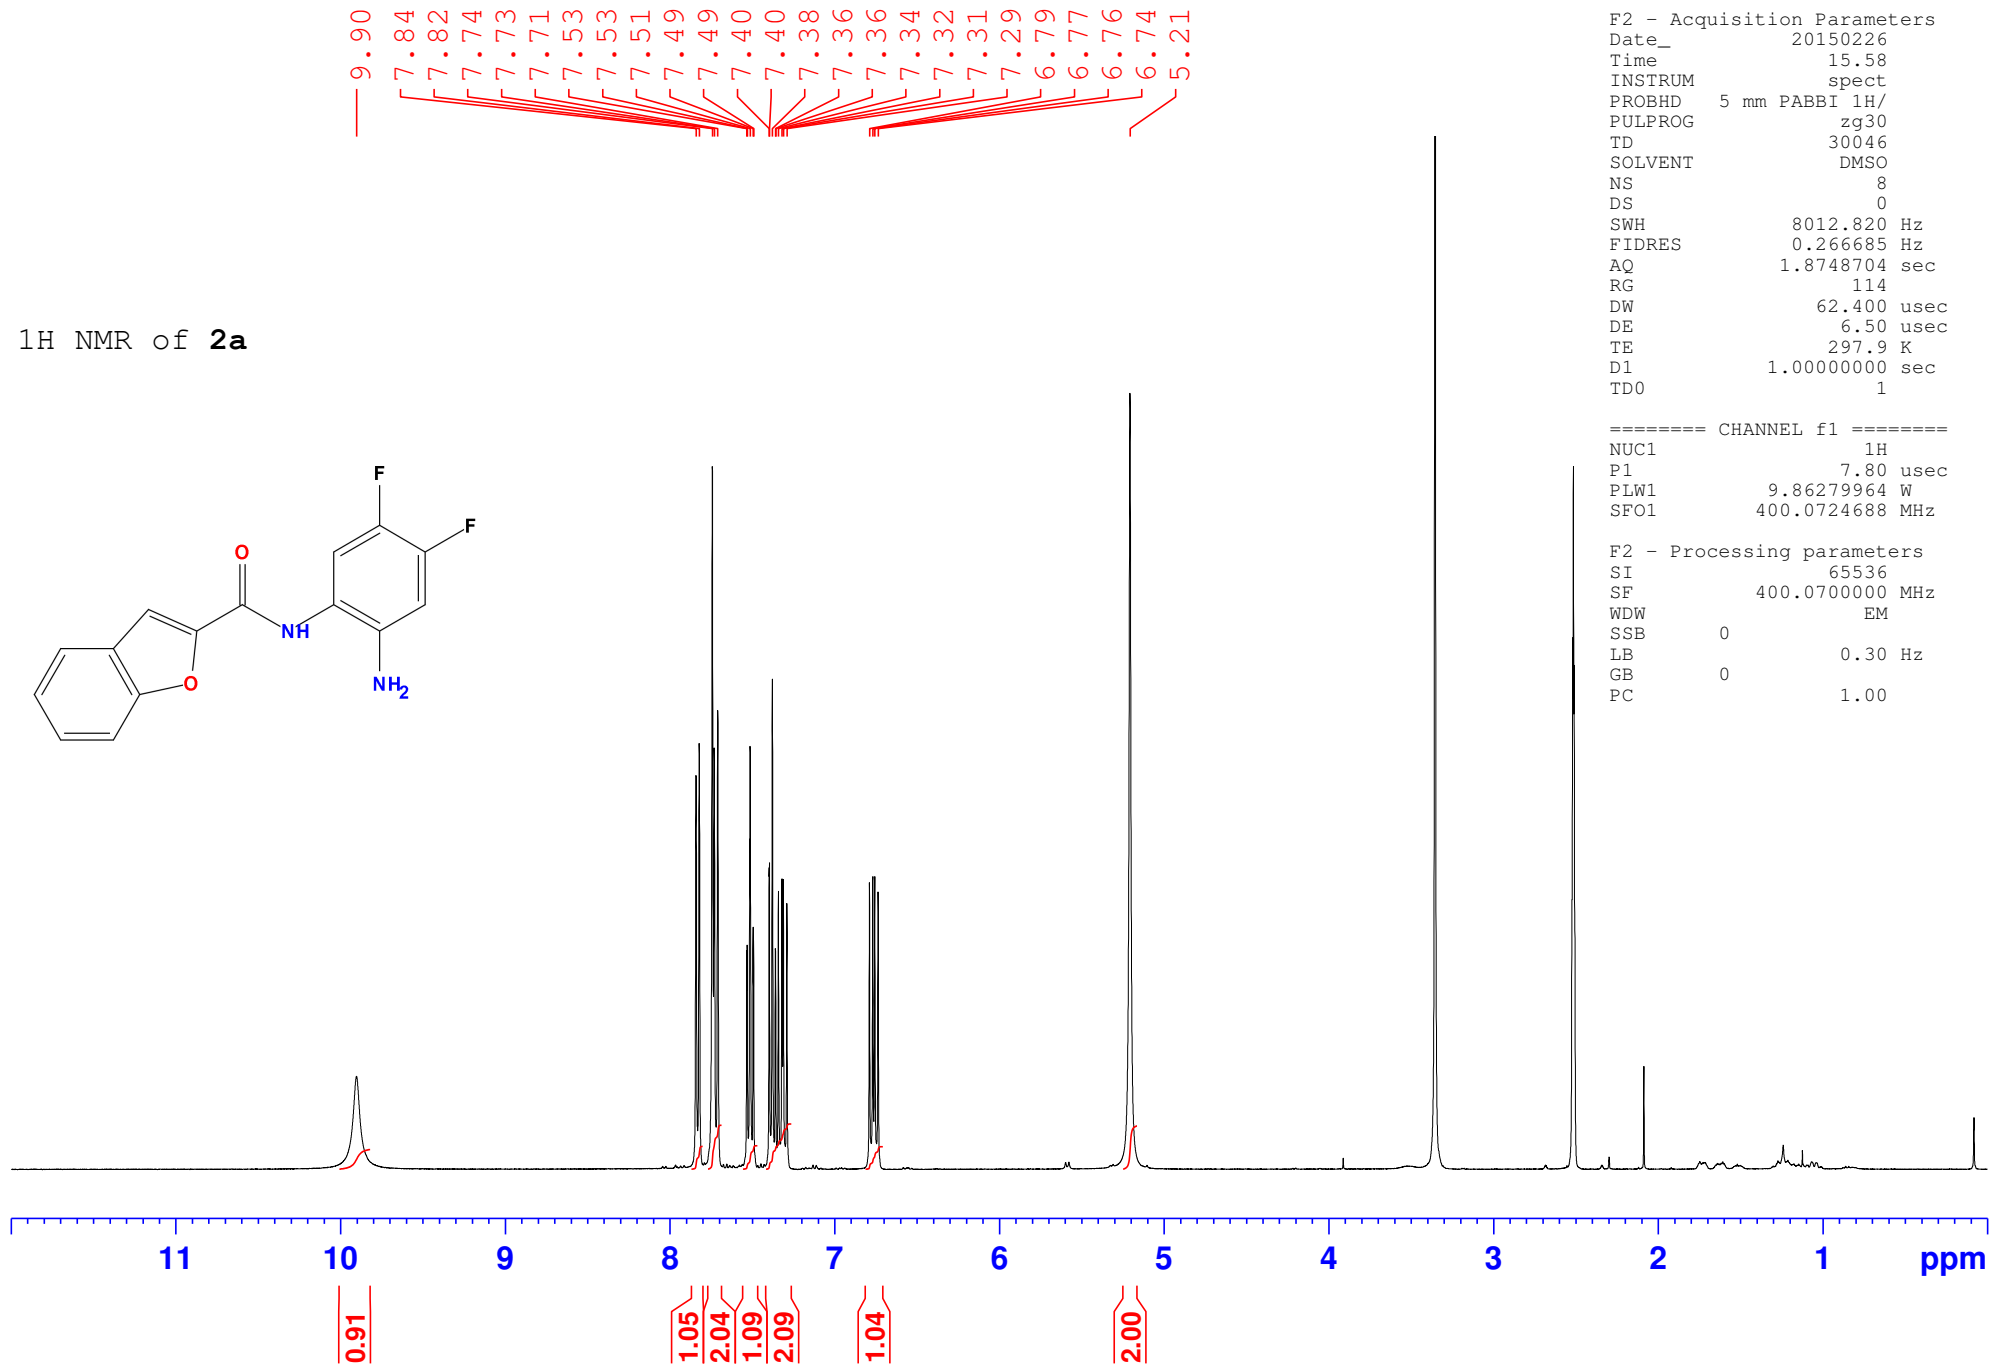

F2 - Acquisition Parameters  
 Date\_ 20150226  
 Time 15.58  
 INSTRUM spect  
 PROBHD 5 mm PABBI 1H/  
 PULPROG zg30  
 TD 30046  
 SOLVENT DMSO  
 NS 8  
 DS 0  
 SWH 8012.820 Hz  
 FIDRES 0.266685 Hz  
 AQ 1.8748704 sec  
 RG 114  
 DW 62.400 usec  
 DE 6.50 usec  
 TE 297.9 K  
 D1 1.00000000 sec  
 TD0 1

==== CHANNEL f1 =====  
 NUC1 1H  
 P1 7.80 usec  
 PLW1 9.86279964 W  
 SFO1 400.0724688 MHz

F2 - Processing parameters  
 SI 65536  
 SF 400.0700000 MHz  
 WDW EM  
 SSB 0  
 LB 0.30 Hz  
 GB 0  
 PC 1.00

<sup>13</sup>C NMR of **2a**

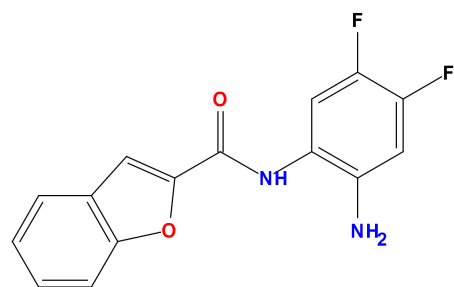

<sup>13</sup>C NMR peak list (ppm):  
 157.59  
 154.85  
 149.17  
 141.43  
 141.35  
 127.60  
 127.56  
 124.29  
 123.36  
 118.07  
 115.99  
 115.80  
 112.37  
 110.99  
 103.65  
 103.45

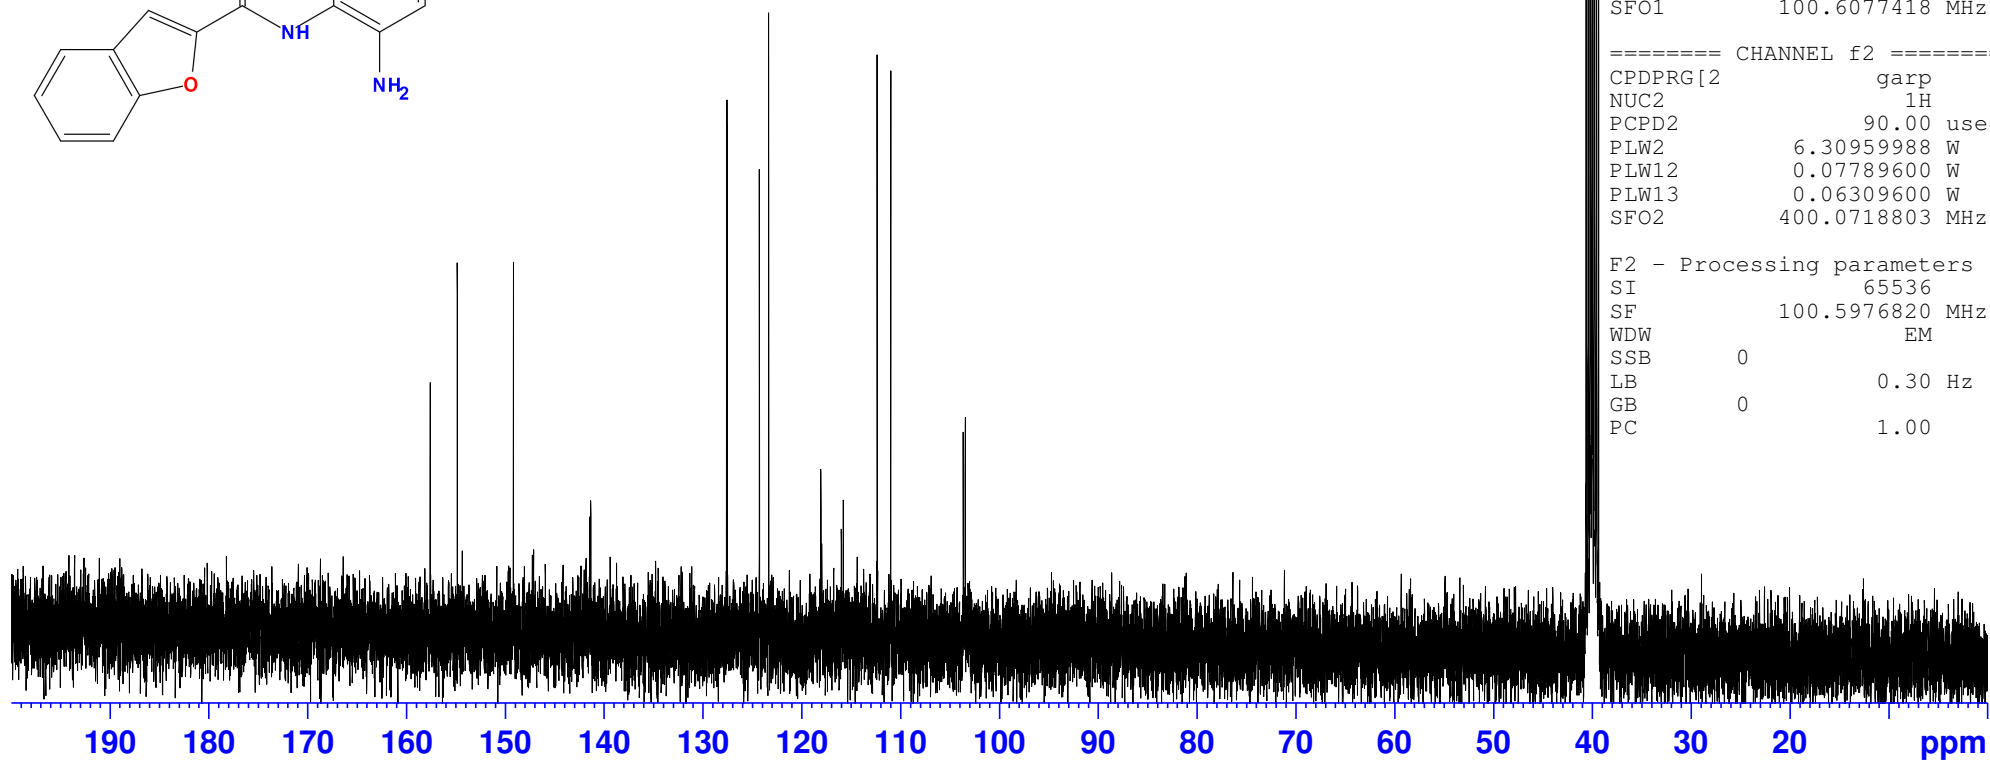

F2 - Acquisition Parameters  
 Date\_ 20150226  
 Time 16.22  
 INSTRUM spect  
 PROBHD 5 mm PABBI 1H/  
 PULPROG zgpg30  
 TD 30046  
 SOLVENT DMSO  
 NS 256  
 DS 8  
 SWH 25252.525 Hz  
 FIDRES 0.840462 Hz  
 AQ 0.5949108 sec  
 RG 1290  
 DW 19.800 usec  
 DE 6.50 usec  
 TE 298.0 K  
 D1 4.00000000 sec  
 D11 0.03000000 sec  
 TD0 1

==== CHANNEL f1 =====  
 NUC1 13C  
 P1 13.70 usec  
 PLW1 102.0899634 W  
 SFO1 100.6077418 MHz

==== CHANNEL f2 =====  
 CPDPRG[2] garp  
 NUC2 1H  
 PCPD2 90.00 usec  
 PLW2 6.30959988 W  
 PLW12 0.07789600 W  
 PLW13 0.06309600 W  
 SFO2 400.0718803 MHz

F2 - Processing parameters  
 SI 65536  
 SF 100.5976820 MHz  
 WDW EM  
 SSB 0  
 LB 0.30 Hz  
 GB 0  
 PC 1.00

19F NMR of 2a

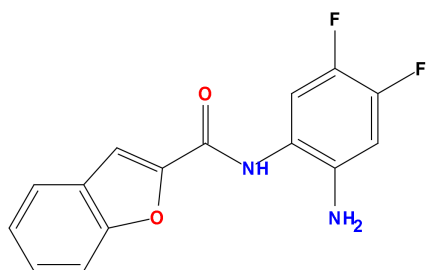

-140.834  
-140.859  
-140.867  
-140.896  
-140.923  
-140.931  
-140.956

F2 - Acquisition Parameters  
Date\_ 20150414  
Time 10.24  
INSTRUM spect  
PROBHD 5 mm PABBI 1H/  
PULPROG zg  
TD 32768  
SOLVENT DMSO  
NS 16  
DS 0  
SWH 15000.000 Hz  
FIDRES 0.457764 Hz  
AQ 1.0922667 sec  
RG 256  
DW 33.333 usec  
DE 6.50 usec  
TE 298.0 K  
D1 2.00000000 sec  
TD0 1

-153.694  
-153.716  
-153.724  
-153.747  
-153.758  
-153.780  
-153.789  
-153.811

==== CHANNEL f1 =====  
NUC1 19F  
P1 18.50 usec  
PLW1 2.51188588 W  
SFO1 376.3835615 MHz

F2 - Processing parameters  
SI 16384  
SF 376.4419100 MHz  
WDW EM  
SSB 0  
LB 2.00 Hz  
GB 0  
PC 1.00

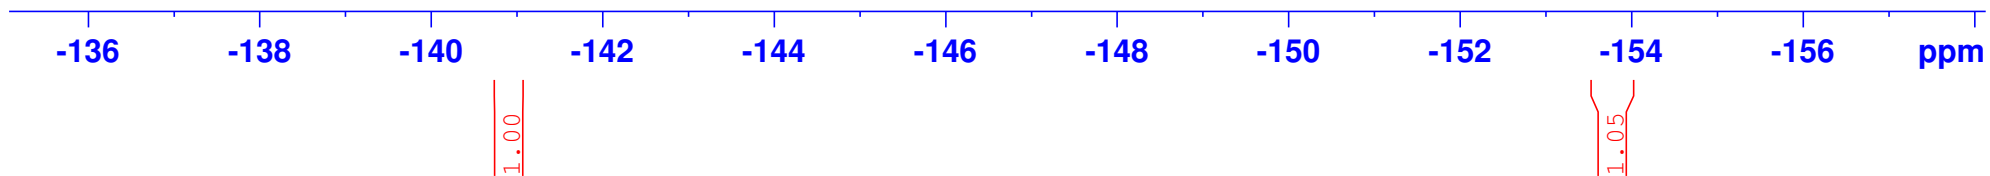



1H NMR of 2b

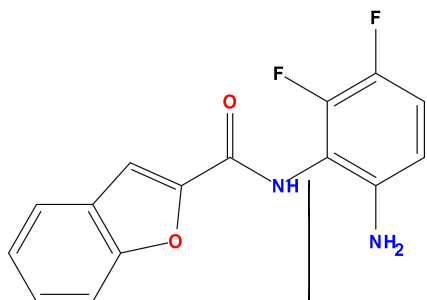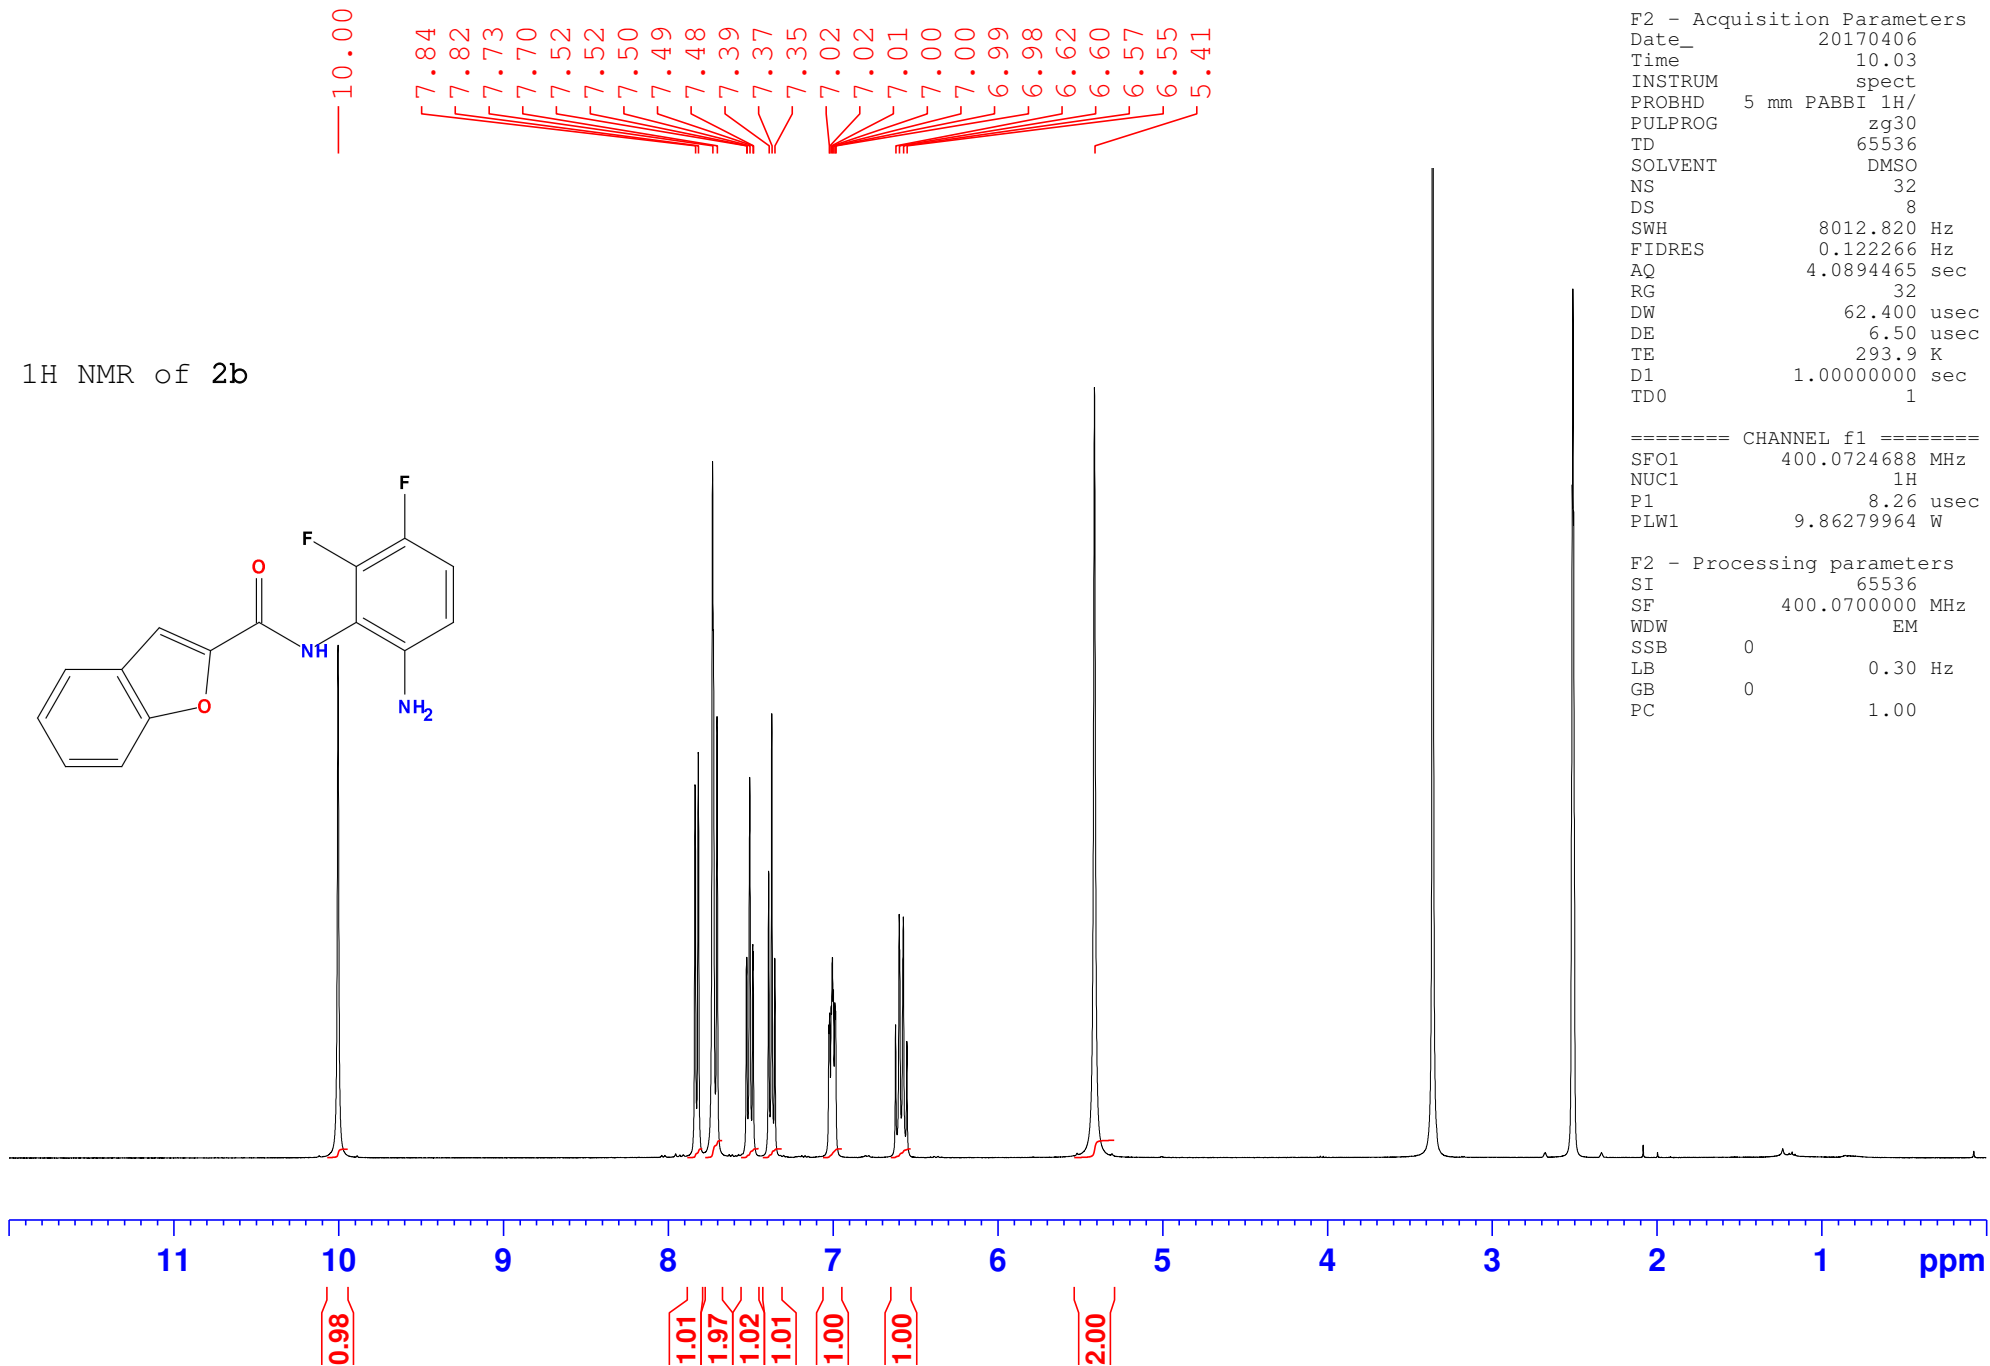

F2 - Acquisition Parameters  
 Date\_ 20170406  
 Time 10.03  
 INSTRUM spect  
 PROBHD 5 mm PABBI 1H/  
 PULPROG zg30  
 TD 65536  
 SOLVENT DMSO  
 NS 32  
 DS 8  
 SWH 8012.820 Hz  
 FIDRES 0.122266 Hz  
 AQ 4.0894465 sec  
 RG 32  
 DW 62.400 usec  
 DE 6.50 usec  
 TE 293.9 K  
 D1 1.00000000 sec  
 TD0 1

==== CHANNEL f1 =====  
 SFO1 400.0724688 MHz  
 NUC1 1H  
 P1 8.26 usec  
 PLW1 9.86279964 W

F2 - Processing parameters  
 SI 65536  
 SF 400.0700000 MHz  
 WDW EM  
 SSB 0  
 LB 0.30 Hz  
 GB 0  
 PC 1.00

<sup>13</sup>C NMR of 2b

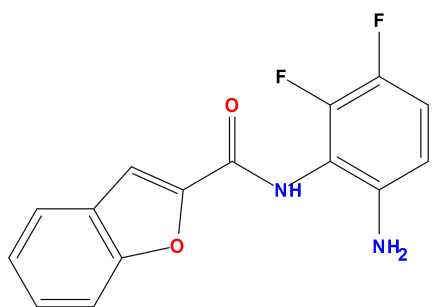

157.81  
154.82  
149.30  
140.46  
138.10  
135.00  
127.62  
127.48  
124.24  
123.32  
119.93  
112.35  
110.85  
102.67  
102.49

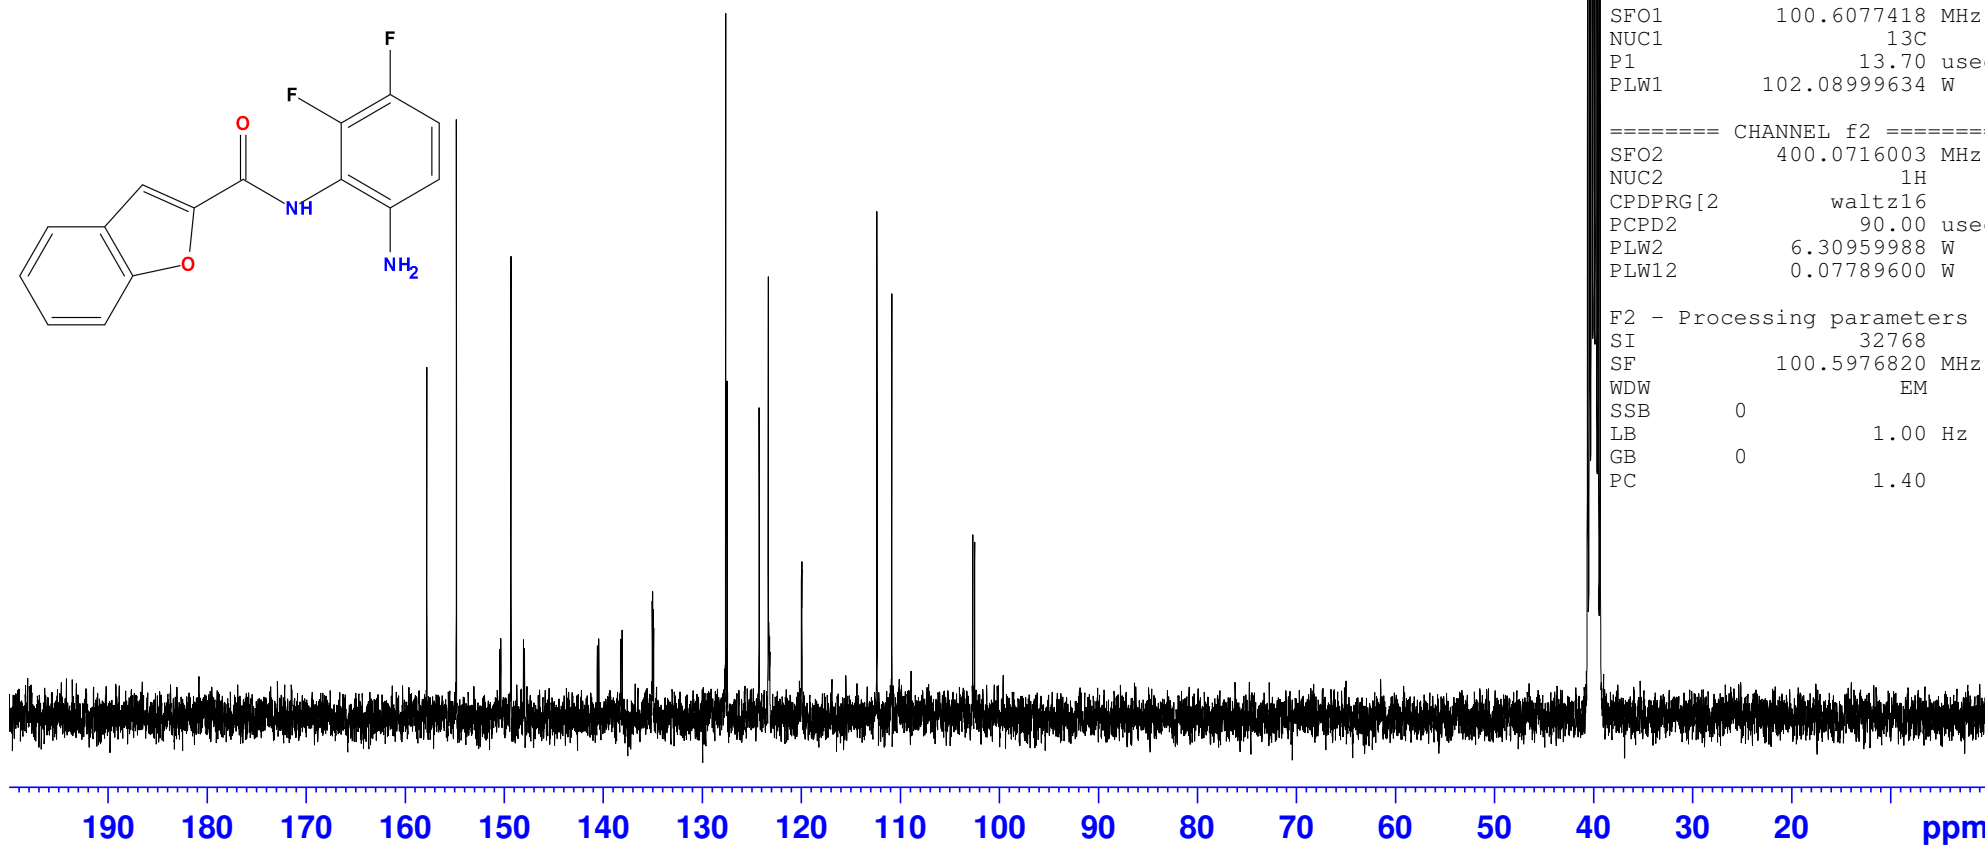

F2 - Acquisition Parameters  
Date\_ 20170410  
Time 16.54  
INSTRUM spect  
PROBHD 5 mm PABBI 1H/  
PULPROG zgig30  
TD 65536  
SOLVENT DMSO  
NS 3072  
DS 8  
SWH 24038.461 Hz  
FIDRES 0.366798 Hz  
AQ 1.3631488 sec  
RG 1290  
DW 20.800 usec  
DE 6.50 usec  
TE 294.2 K  
D1 2.0000000 sec  
D11 0.0300000 sec  
TD0 1

==== CHANNEL f1 =====  
SFO1 100.6077418 MHz  
NUC1 13C  
P1 13.70 usec  
PLW1 102.08999634 W

==== CHANNEL f2 =====  
SFO2 400.0716003 MHz  
NUC2 1H  
CPDPRG[2] waltz16  
PCPD2 90.00 usec  
PLW2 6.30959988 W  
PLW12 0.07789600 W

F2 - Processing parameters  
SI 32768  
SF 100.5976820 MHz  
WDW EM  
SSB 0  
LB 1.00 Hz  
GB 0  
PC 1.40

19F NMR of 2b

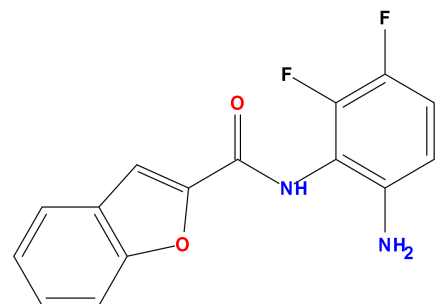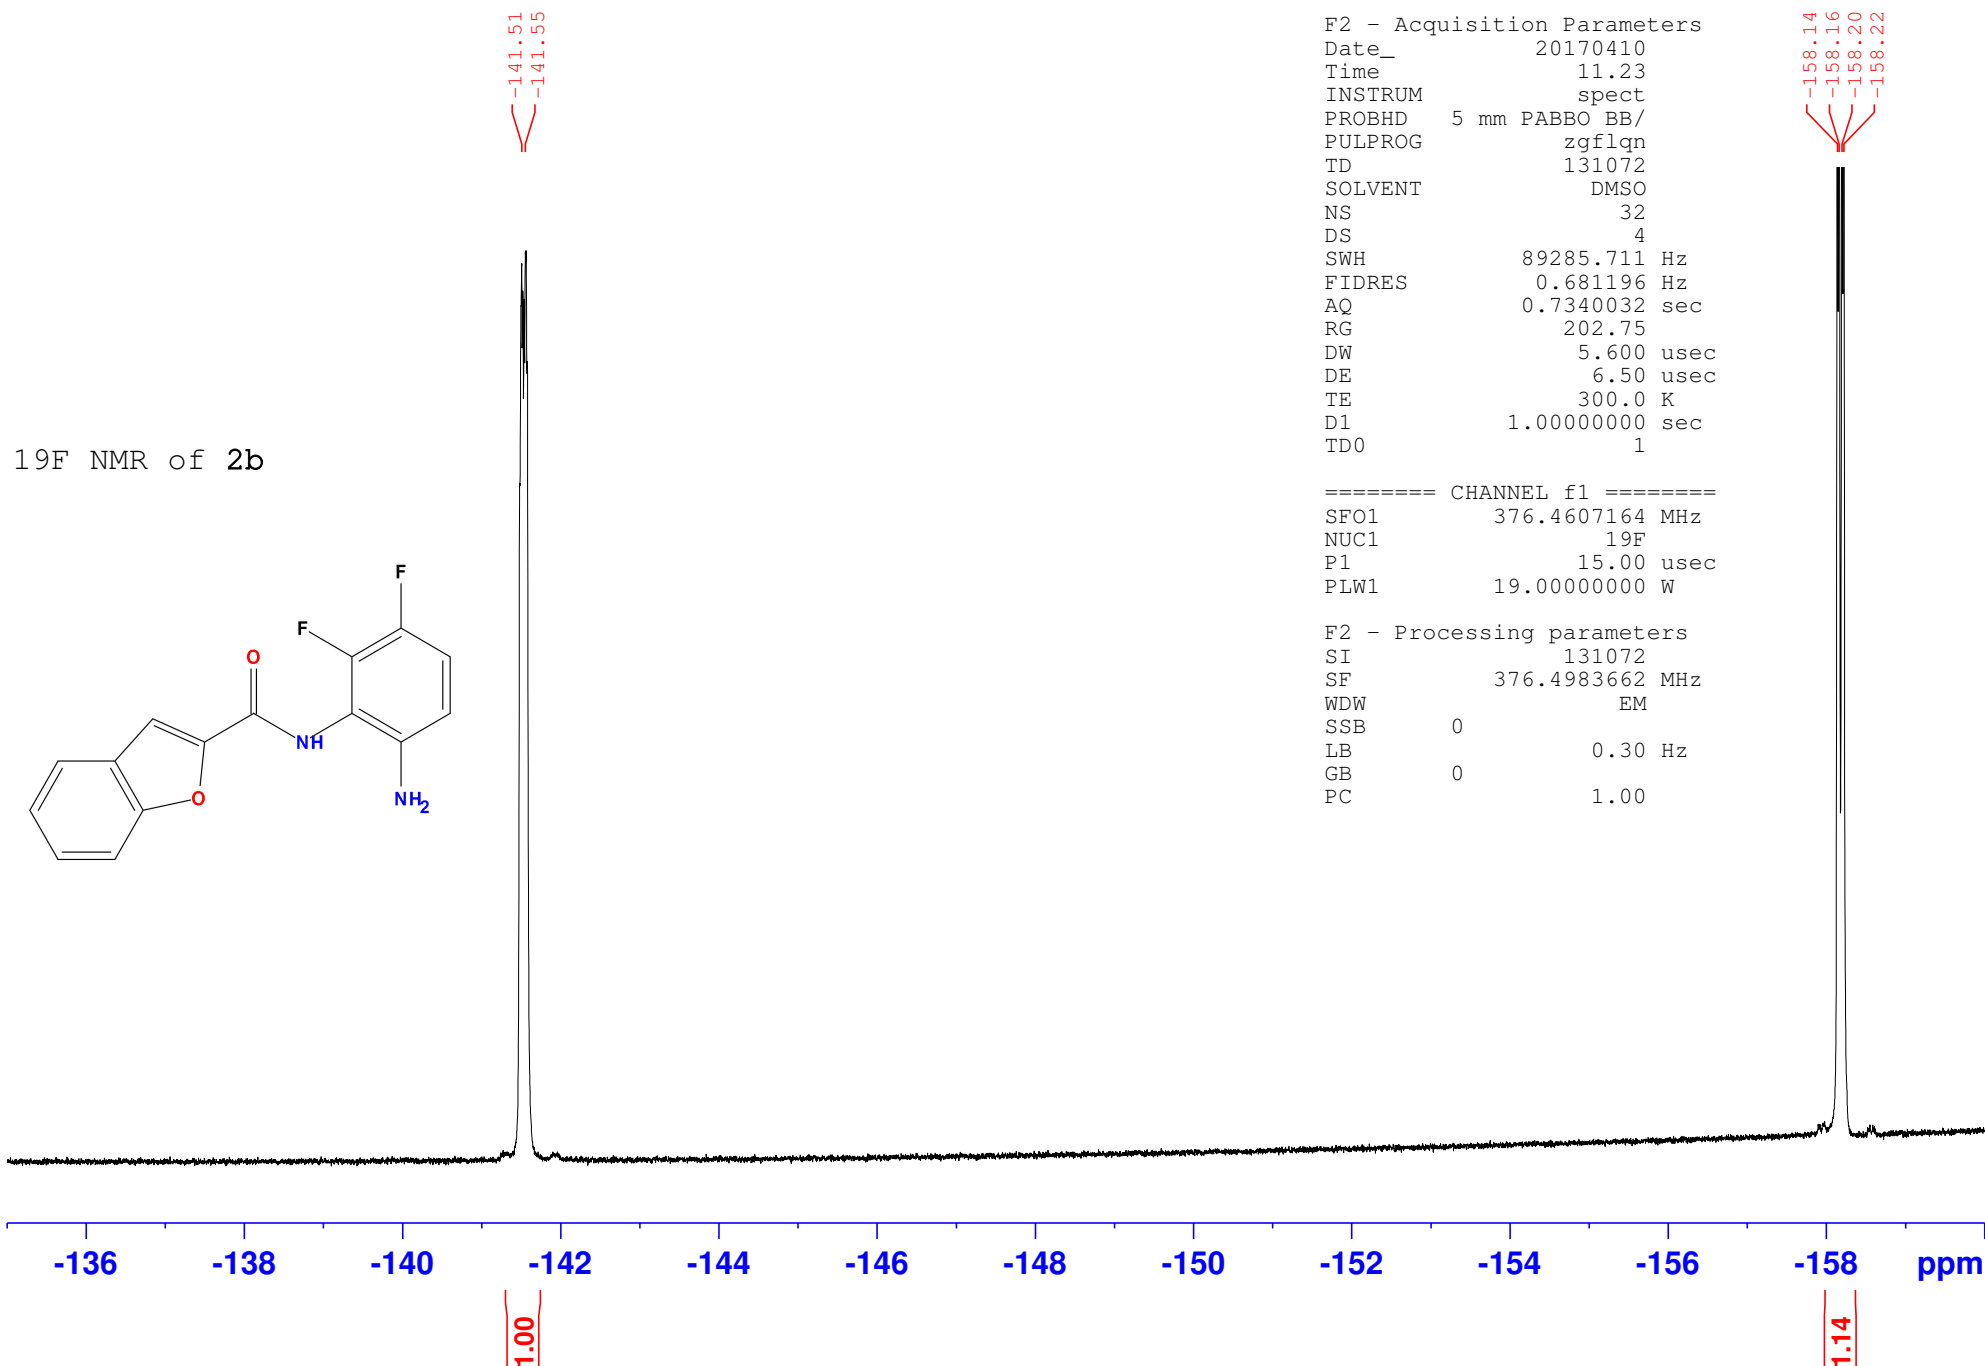

F2 - Acquisition Parameters  
Date\_ 20170410  
Time 11.23  
INSTRUM spect  
PROBHD 5 mm PABBO BB/  
PULPROG zgflqn  
TD 131072  
SOLVENT DMSO  
NS 32  
DS 4  
SWH 89285.711 Hz  
FIDRES 0.681196 Hz  
AQ 0.7340032 sec  
RG 202.75  
DW 5.600 usec  
DE 6.50 usec  
TE 300.0 K  
D1 1.00000000 sec  
TD0 1

==== CHANNEL f1 =====  
SFO1 376.4607164 MHz  
NUC1 19F  
P1 15.00 usec  
PLW1 19.00000000 W

F2 - Processing parameters  
SI 131072  
SF 376.4983662 MHz  
WDW EM  
SSB 0  
LB 0.30 Hz  
GB 0  
PC 1.00

<sup>1</sup>H NMR of 2c

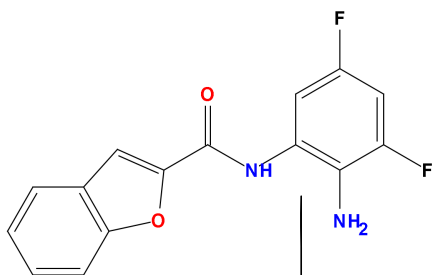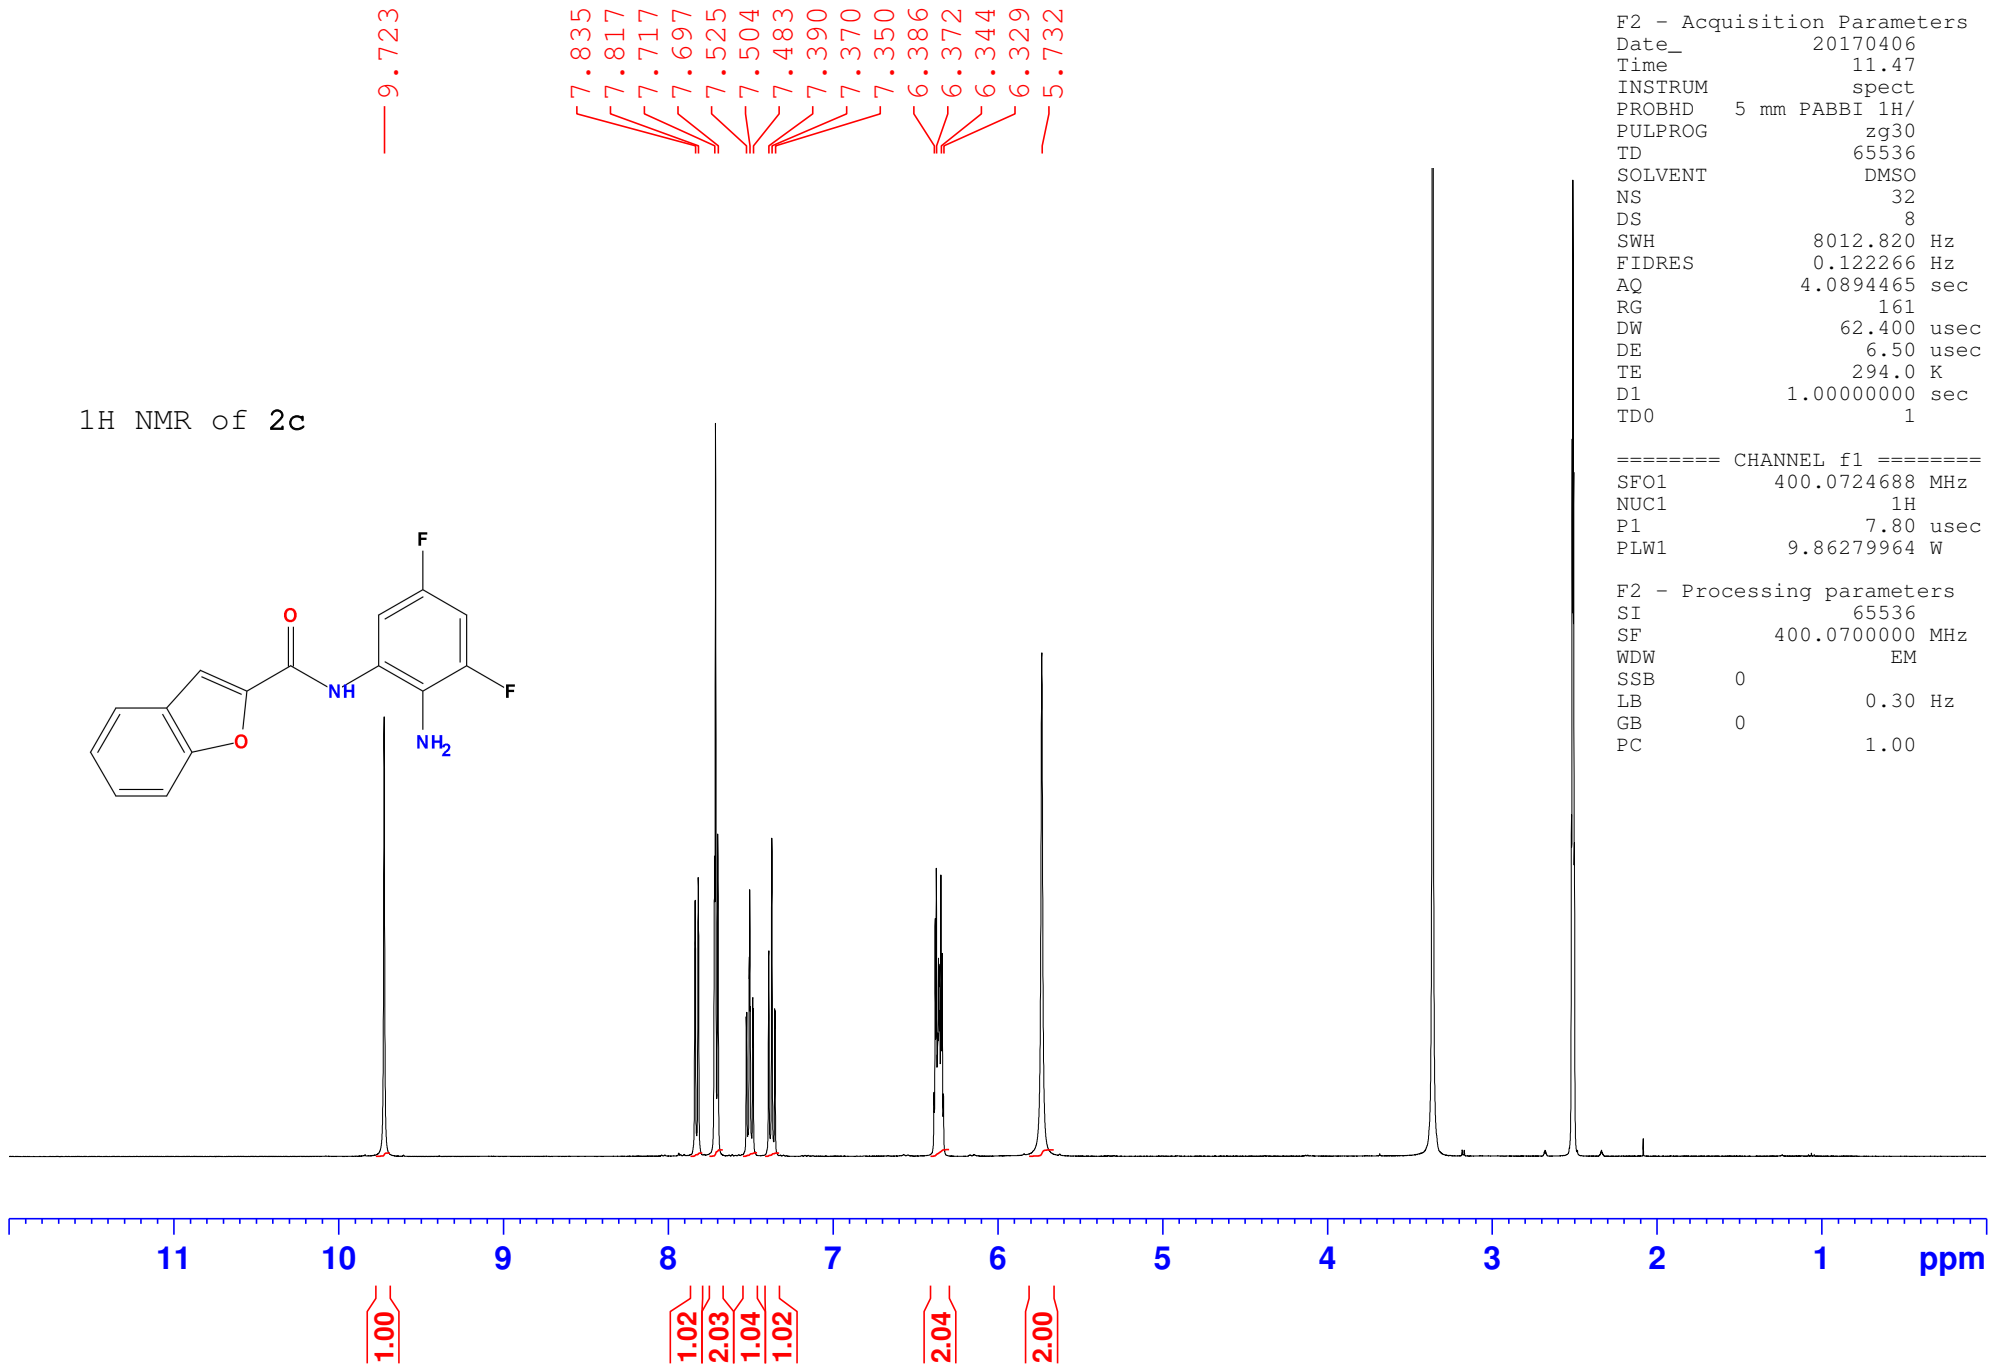

F2 - Acquisition Parameters  
Date\_ 20170406  
Time 11.47  
INSTRUM spect  
PROBHD 5 mm PABBI 1H/  
PULPROG zg30  
TD 65536  
SOLVENT DMSO  
NS 32  
DS 8  
SWH 8012.820 Hz  
FIDRES 0.122266 Hz  
AQ 4.0894465 sec  
RG 161  
DW 62.400 usec  
DE 6.50 usec  
TE 294.0 K  
D1 1.00000000 sec  
TD0 1

==== CHANNEL f1 =====  
SFO1 400.0724688 MHz  
NUC1 1H  
P1 7.80 usec  
PLW1 9.86279964 W

F2 - Processing parameters  
SI 65536  
SF 400.0700000 MHz  
WDW EM  
SSB 0  
LB 0.30 Hz  
GB 0  
PC 1.00

13C NMR of 2c

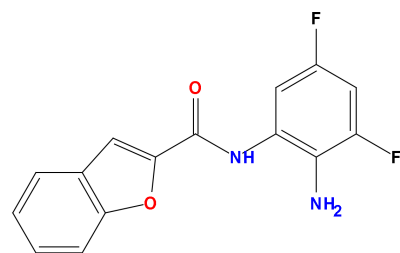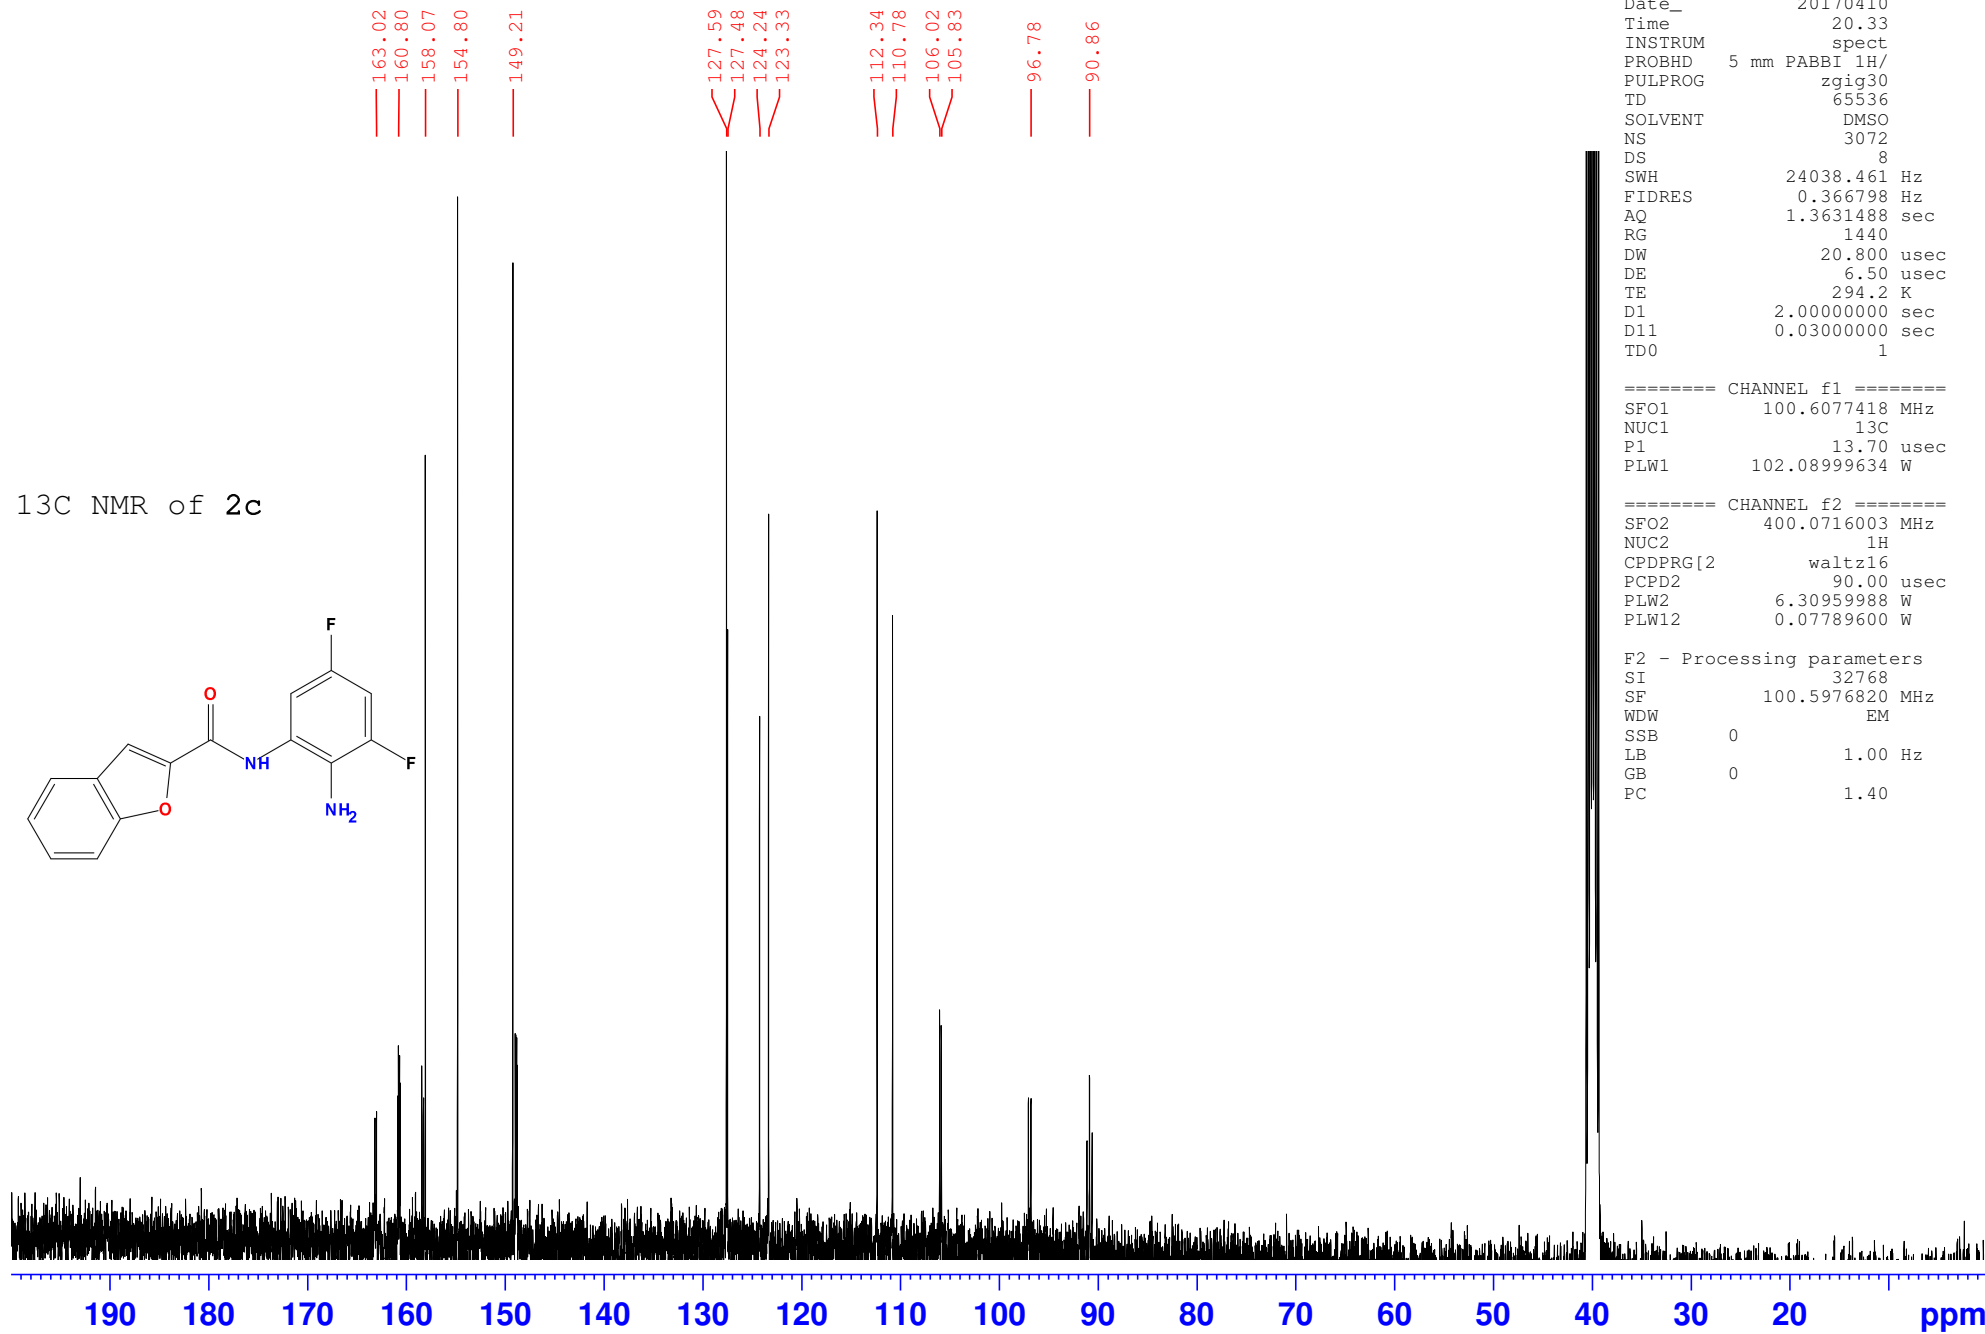

F2 - Acquisition Parameters  
 Date\_ 20170410  
 Time 20.33  
 INSTRUM spect  
 PROBHND 5 mm PABBI 1H/  
 PULPROG zgig30  
 TD 65536  
 SOLVENT DMSO  
 NS 3072  
 DS 8  
 SWH 24038.461 Hz  
 FIDRES 0.366798 Hz  
 AQ 1.3631488 sec  
 RG 1440  
 DW 20.800 usec  
 DE 6.50 usec  
 TE 294.2 K  
 D1 2.00000000 sec  
 D11 0.03000000 sec  
 TD0 1

===== CHANNEL f1 =====  
 SFO1 100.6077418 MHz  
 NUC1 13C  
 P1 13.70 usec  
 PLW1 102.08999634 W

===== CHANNEL f2 =====  
 SFO2 400.0716003 MHz  
 NUC2 1H  
 CPDPRG[2] waltz16  
 PCPD2 90.00 usec  
 PLW2 6.30959988 W  
 PLW12 0.07789600 W

F2 - Processing parameters  
 SI 32768  
 SF 100.5976820 MHz  
 WDW EM  
 SSB 0  
 LB 1.00 Hz  
 GB 0  
 PC 1.40

19F NMR of 2c

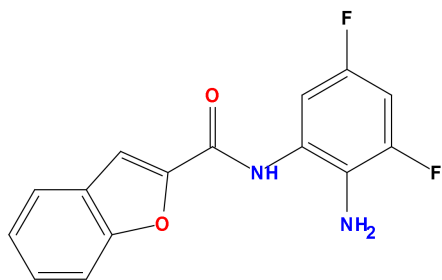

-112.66  
-112.69  
-112.71  
-112.74

F2 - Acquisition Parameters  
Date\_ 20170410  
Time 11.25  
INSTRUM spect  
PROBHD 5 mm PABBO BB/  
PULPROG zgflqn  
TD 131072  
SOLVENT DMSO  
NS 32  
DS 4  
SWH 89285.711 Hz  
FIDRES 0.681196 Hz  
AQ 0.7340032 sec  
RG 202.75  
DW 5.600 usec  
DE 6.50 usec  
TE 300.0 K  
D1 1.00000000 sec  
TDO 1

-117.19  
-117.21  
-117.23

==== CHANNEL f1 =====  
SFO1 376.4607164 MHz  
NUC1 19F  
P1 15.00 usec  
PLW1 19.00000000 W

F2 - Processing parameters  
SI 131072  
SF 376.4983662 MHz  
WDW EM  
SSB 0  
LB 0.30 Hz  
GB 0  
PC 1.00

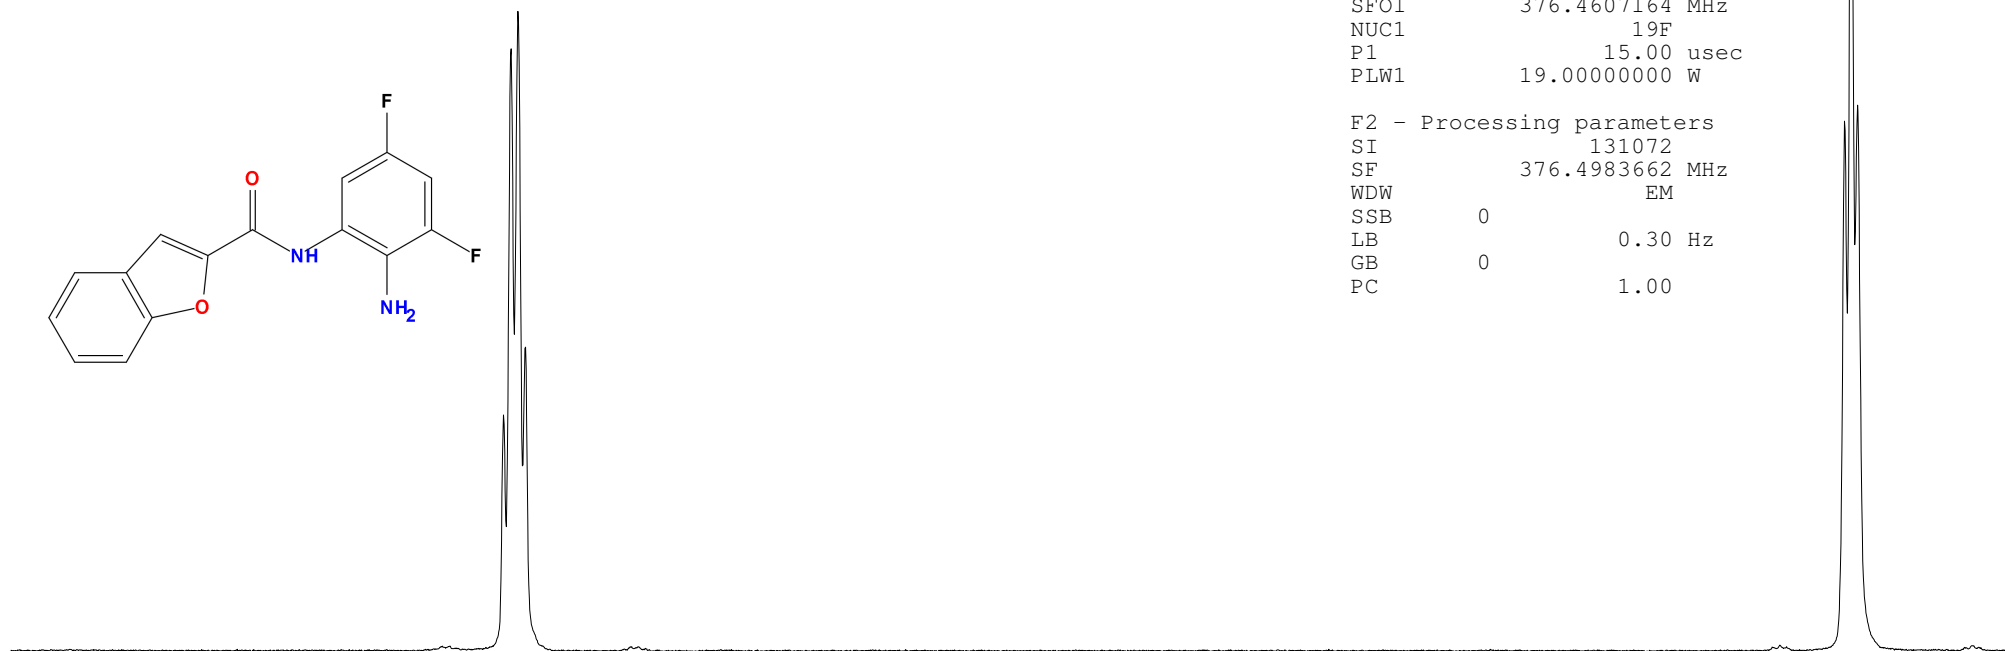

0.89

1.00
